# Supplementary material for: Organocatalytic tandem Morita–Baylis–Hillman–Michael reaction for asymmetric synthesis of a drug-like oxa-spirocyclic indanone scaffold
Source: Royal Society of Chemistry journal article supplement (doi:10.1039/c3cc44004d), 2013-01-01
Supplement: c3cc44004d.pdf [file c3cc44004d.pdf]

# Organocatalytic tandem Morita-Baylis-Hillman/Michael reaction for asymmetric synthesis of a drug-like oxa-spirocyclic indanone scaffold

Xiang Li,<sup>a</sup> Lei Yang,<sup>a</sup> Cheng Peng,<sup>\*a,b</sup> Xin Xie,<sup>a</sup> Hai-Jun Leng,<sup>b</sup> Biao Wang,<sup>b</sup> Zheng-Wei Tang,<sup>b</sup>

Gu He,<sup>c</sup> Liang Ouyang,<sup>c</sup> Wei Huang<sup>\*b</sup> and Bo Han<sup>\*a</sup>

<sup>a</sup> State Key Laboratory Breeding Base of Systematic Research, Development and Utilization of Chinese Medicine Resources, School of Pharmacy, Chengdu University of Traditional Chinese Medicine, Chengdu 611137, P. R. China. E-mail: [hanbo@cdutcm.edu.cn](mailto:hanbo@cdutcm.edu.cn); [pengchengchengdu@126.com](mailto:pengchengchengdu@126.com)

<sup>b</sup> Ministry of Education Key Laboratory of Standardization of Chinese Medicine, School of Pharmacy, Chengdu University of Traditional Chinese Medicine, Chengdu 611137, P. R. China. E-mail: [huangwei@cdutcm.edu.cn](mailto:huangwei@cdutcm.edu.cn)

<sup>c</sup> State Key Laboratory of Biotherapy, West China Hospital, Sichuan University, Chengdu 610041, P. R. China.

## Supporting Information

### Table of Contents

1. General methods
2. General procedure for the asymmetric synthesis of spiroindanone  $\delta$ -lactone 6
3. Screening studies to improve the yield of hexahydrofuro[2,3-*b*]pyran derivatives 7
4. General procedure for the asymmetric synthesis of 7
5. Crystal data of 6b
6. Proposed catalytic cycles for the enantioselective transformation
7. NMR spectra and HPLC chromatograms
8. The confirmation of the absolute configuration of 7l

## 1. General methods

NMR data was obtained for  $^1\text{H}$  at 400 MHz, and for  $^{13}\text{C}$  at 100 MHz. Chemical shifts were reported in ppm from tetramethylsilane with the solvent resonance as the internal standard in  $\text{CDCl}_3$  solution. ESI HRMS was recorded on a Waters SYNAPT G2. In each case, enantiomeric ratio was determined by HPLC analysis on chiral column in comparison with authentic racemates, using a Daicel Chiralpak AD-H Column (250 x 4.6 mm), Daicel Chiralpak OD-H Column (250 x 4.6 mm) or Kromasil CelluCoat Column (250 x 4.6 mm). UV detection was monitored at 220 nm or 254 nm. Optical rotation data were examined in  $\text{CH}_2\text{Cl}_2$  solution at 20 °C. Column chromatography was performed on silica gel (200-300 mesh) eluting with ethyl acetate and petroleum ether. TLC was performed on glass-backed silica plates. UV light and  $\text{I}_2$  were used to visualize products. Melting points were determined on a Mel-Temp apparatus and are uncorrected. All chemicals were used without purification as commercially available unless otherwise noted. The catalysts **II** were synthesized according to the literature procedures.<sup>[1]</sup>

[1]. (a) Marigo, M.; Wabnitz, T. C.; Fielenbach, D.; Jørgensen, K. A. *Angew. Chem., Int. Ed.* **2005**, *44*, 794. (b) Hayashi, Y.; Gotoh, H.; Hayasi, T.; Shoji, M. *Angew. Chem., Int. Ed.* **2005**, *44*, 4212.

## 2. General procedure for the asymmetric synthesis of spiroindanone $\delta$ -lactone **6**

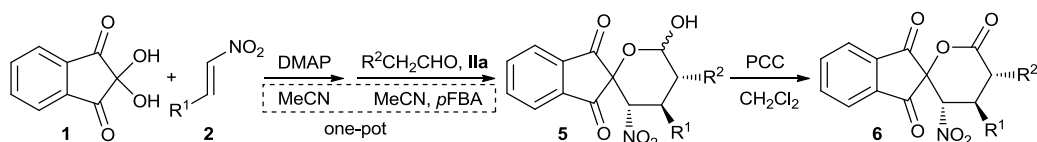

The reaction was carried out with ninhydrin **1** (89 mg, 0.5 mmol) and nitroolefin **2** (0.4 mmol) in the presence of DMAP (3.6 mg, 0.04 mmol) in MeCN (2.0 mL) at room temperature for 1 h to afford the MBH adduct **3**, after which aldehyde **4** (0.5 mmol), diphenyl prolinol TMS ether **IIa** (32.5 mg, 0.1 mmol) and 4-fluorobenzoic acid (14.0 mg, 0.1 mmol) were added in one-pot. The reaction mixture was stirred at room temperature for a specified reaction time (about 3h) until the reaction completed (monitored by TLC). Then the reaction mixture was concentrated and the residue was purified by flash chromatography on silica gel (petroleum ether/ethyl acetate = 10:1) to give hemiacetal **5**.

Hemiacetal **5** were oxidized to the stable corresponding spiroindanone  $\delta$ -lactone **6**. To a solution of **5** in methylene chloride (5 mL) was added PCC (107.8 mg, 0.5 mmol). The mixture was stirred for 2 h at 50 °C. The solid was removed by filtration through celite. The filtrate was evaporated under reduced pressure and the residual was purified by column chromatography (petroleum ether/ethyl acetate = 15:1) to give spiroindanone  $\delta$ -lactone **6**. The dr values of **6** were calculated by <sup>1</sup>H NMR analysis of the crude reaction mixture and the major diastereomers of **6** could be isolated in pure form for NMR, HRMS and HPLC analysis.

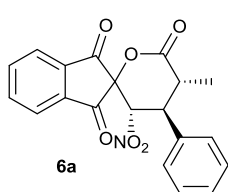

**6a** was obtained as a white solid in 76% yield for two steps after flash chromatography and the enantiomeric excess was determined to be 93% by HPLC on Chiralpak OD-H column (30% 2-propanol/n-hexane, 1 mL/min), UV 254 nm,  $t_{\text{minor}} = 11.05$  min,  $t_{\text{major}} = 12.11$  min. m.p. 167-168 °C;  $[\alpha]_{\text{D}}^{20} -129.4$  ( $c = 0.12$  in CH<sub>2</sub>Cl<sub>2</sub>); <sup>1</sup>H NMR (400 MHz, CDCl<sub>3</sub>):  $\delta = 8.12$ -8.05 (m, 2H), 8.01-7.94 (m, 2H), 7.40-7.34 (m, 3H), 7.27-7.26 (m, 2H), 5.64 (d,  $J = 12.4$  Hz, 1H), 4.16 (t,  $J = 12.0$  Hz, 1H), 3.10-3.02 (m, 1H), 1.39 (d,  $J = 6.8$  Hz, 3H) ppm; <sup>13</sup>C NMR (100 MHz, CDCl<sub>3</sub>):  $\delta = 192.31$ , 190.03, 169.62, 141.15, 140.18, 138.00, 137.48, 135.43, 129.51, 129.05, 127.77, 124.99, 124.72, 87.28, 46.58, 41.42, 14.74 ppm; ESI HRMS: calcd. For C<sub>20</sub>H<sub>15</sub>NO<sub>6</sub>+Na 388.0797, found 388.0795.

For the minor diastereomer of **6a**, <sup>1</sup>H NMR (400 MHz, CDCl<sub>3</sub>):  $\delta = 8.05$ -7.84 (m, 4H), 7.33-7.18 (m, 5H), 5.56 (d,  $J = 12.0$  Hz, 1H), 4.09 (t,  $J = 11.6$  Hz, 1H), 3.02-2.94 (m, 1H), 1.31 (d,  $J = 6.8$  Hz, 3H) ppm; ESI HRMS: calcd. For C<sub>20</sub>H<sub>15</sub>NO<sub>6</sub>+Na 388.0797, found 388.0796.

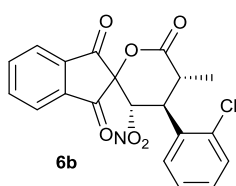

**6b** was obtained as a white solid in 76% yield for two steps after flash chromatography and the enantiomeric excess was determined to be 99% by HPLC on Kromasil CelluCoat column (10% 2-propanol/n-hexane, 1 mL/min), UV 254 nm,  $t_{\text{minor}} = 26.42$  min,  $t_{\text{major}} = 28.33$  min. m.p. 167-168 °C;  $[\alpha]_{\text{D}}^{20} -126.2$  ( $c = 0.18$  in CH<sub>2</sub>Cl<sub>2</sub>); <sup>1</sup>H NMR (400 MHz, CDCl<sub>3</sub>):  $\delta = 8.15$ -8.07 (m, 2H), 8.03-7.95 (m, 2H), 7.43-7.39 (m, 3H), 7.30-7.27 (m, 1H), 5.63 (d,  $J = 12.4$  Hz, 1H), 5.19 (t,  $J = 12.0$  Hz, 1H), 2.99-2.97 (m, 1H), 1.42 (d,  $J = 6.4$  Hz, 3H) ppm; <sup>13</sup>C NMR (100 MHz, CDCl<sub>3</sub>):  $\delta = 192.07$ , 190.04, 169.22, 141.15, 140.21, 137.90, 137.43, 135.66, 133.85, 130.44, 129.83, 128.10, 126.70, 124.99, 124.93, 86.23, 42.39, 40.71, 14.31 ppm; ESI HRMS: calcd. For C<sub>20</sub>H<sub>14</sub>ClNO<sub>6</sub>+Na 422.0407, found 422.0409.

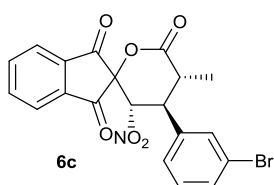

**6c** was obtained as a white solid in 78% yield for two steps after flash chromatography and the enantiomeric excess was determined to be 98% by HPLC on Chiralpak OD-H column (20% 2-propanol/n-hexane, 1 mL/min), UV 220 nm,  $t_{\text{minor}} = 13.62$  min,  $t_{\text{major}} = 14.97$  min. m.p. 168-169 °C;  $[\alpha]_{\text{D}}^{20}$

-95.2 ( $c = 0.12$  in  $\text{CH}_2\text{Cl}_2$ );  $^1\text{H}$  NMR (400 MHz,  $\text{CDCl}_3$ ):  $\delta = 8.13$ -8.07 (m, 2H), 8.03-7.98 (m, 2H), 7.50-7.43 (m, 2H), 7.30-7.20 (m, 2H), 5.60 (d,  $J = 12.0$  Hz, 1H), 4.15 (t,  $J = 11.6$  Hz, 1H), 3.03-2.99 (m, 1H), 1.40 (d,  $J = 6.8$  Hz, 3H) ppm;  $^{13}\text{C}$  NMR (100 MHz,  $\text{CDCl}_3$ ):  $\delta = 192.17$ , 189.80, 169.08, 141.07, 140.21, 138.01, 137.82, 137.57, 132.32, 131.06, 130.90, 126.44, 125.06, 124.78, 123.53, 86.78, 46.17, 41.30, 14.78 ppm; ESI HRMS: calcd. For  $\text{C}_{20}\text{H}_{14}\text{BrNO}_6 + \text{Na}$  465.9902, found 465.9905.

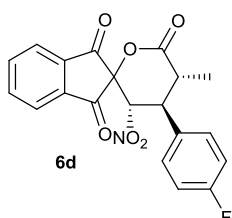

**6d** was obtained as a white solid in 72% yield for two steps after flash chromatography and the enantiomeric excess was determined to be 97% by HPLC on Chiralpak OD-H column (20% 2-propanol/n-hexane, 1 mL/min), UV 254 nm,  $t_{\text{minor}} = 11.74$  min,  $t_{\text{major}} = 13.13$  min. m.p. 170-172 °C;  $[\alpha]_{\text{D}}^{20}$

-107.6 ( $c = 0.12$  in  $\text{CH}_2\text{Cl}_2$ );  $^1\text{H}$  NMR (400 MHz,  $\text{CDCl}_3$ ):  $\delta = 8.13$ -8.06 (m, 2H), 8.03-7.96 (m, 2H), 7.26-7.23 (m, 2H), 7.11-7.07 (m, 2H), 5.57 (d,  $J = 12.4$  Hz, 1H), 4.18 (t,  $J = 12.0$  Hz, 1H), 3.02-2.97 (m, 1H), 1.39 (d,  $J = 6.8$  Hz, 3H) ppm;  $^{13}\text{C}$  NMR (100 MHz,  $\text{CDCl}_3$ ):  $\delta = 192.25$ , 189.90, 169.29, 162.84 (d,  $J_{\text{CF}} = 248$  Hz), 141.11, 140.17, 138.04, 137.55, 131.20, 129.49 (d,  $J_{\text{CF}} = 8$  Hz), 125.04, 124.76, 116.65 (d,  $J_{\text{CF}} = 22$  Hz), 99.99, 87.21, 45.87, 41.54, 14.70 ppm; ESI HRMS: calcd. For  $\text{C}_{20}\text{H}_{14}\text{FNO}_6 + \text{H}$  384.0883, found 384.0886.

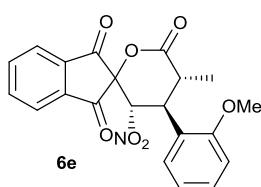

**6e** was obtained as a white solid in 70% yield for two steps after flash chromatography and the enantiomeric excess was determined to be 99% by HPLC on Chiralpak OD-H column (20% 2-propanol/n-hexane, 1 mL/min), UV 254 nm,  $t_{\text{minor}} = 15.64$  min,  $t_{\text{major}} = 17.68$  min. m.p. 168-170 °C;  $[\alpha]_{\text{D}}^{20}$

-125.8 ( $c = 0.08$  in  $\text{CH}_2\text{Cl}_2$ );  $^1\text{H}$  NMR (400 MHz,  $\text{CDCl}_3$ ):  $\delta = 8.12$ -8.05 (m, 2H), 8.01-7.93 (m, 2H), 7.34-7.30 (m, 1H), 7.08-7.06 (m, 1H), 6.95-6.89 (m, 2H), 6.14 (br s, 1H), 4.24 (br s, 1H), 3.93 (s, 3H), 3.52 (br s, 1H), 1.39 (d,  $J = 6.8$  Hz, 3H) ppm;  $^{13}\text{C}$  NMR (100 MHz,  $\text{CDCl}_3$ ):  $\delta = 192.67$ , 190.39, 170.38, 157.58, 141.32, 140.22, 137.72, 137.18, 130.31, 124.86, 124.61, 122.27, 122.21, 121.25, 111.62, 84.56, 55.59, 50.44, 38.60, 15.38 ppm; ESI HRMS: calcd. For  $\text{C}_{21}\text{H}_{17}\text{NO}_6 + \text{Na}$

418.0903, found 418.0901.

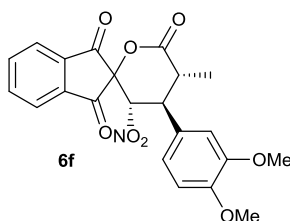

**6f** was obtained as a white solid in 65% yield for two steps after flash chromatography and the enantiomeric excess was determined to be 97% by HPLC on Chiralpak OD-H column (20% 2-propanol/n-hexane, 1 mL/min), UV 220 nm,  $t_{\text{minor}} = 27.63$  min,  $t_{\text{major}} = 36.53$  min. m.p. 171-172 °C;  $[\alpha]_{\text{D}}^{20}$

-139.9 ( $c = 0.12$  in  $\text{CH}_2\text{Cl}_2$ );  $^1\text{H}$  NMR (400 MHz,  $\text{CDCl}_3$ ):  $\delta = 8.13$ -8.06 (m, 2H), 8.03-7.95 (m, 2H), 7.27 (s, 1H), 6.86-6.79 (m, 2H), 6.71-6.70 (m, 1H), 5.58 (d,  $J = 12.4$  Hz, 1H), 4.09 (t,  $J = 12.0$  Hz, 1H), 3.89 (s, 3H), 3.87 (s, 3H), 3.06-2.98 (m, 1H), 1.41 (d,  $J = 6.8$  Hz, 3H) ppm;  $^{13}\text{C}$  NMR (100 MHz,  $\text{CDCl}_3$ ):  $\delta = 192.36, 190.09, 169.64, 149.61, 149.43, 141.18, 140.17, 138.01, 137.47, 127.55, 124.99, 124.67, 120.08, 111.67, 110.36, 87.54, 56.07, 55.90, 46.35, 41.61, 14.77$  ppm; ESI HRMS: calcd. For  $\text{C}_{22}\text{H}_{19}\text{NO}_8 + \text{Na}$  448.1008, found 448.1011.

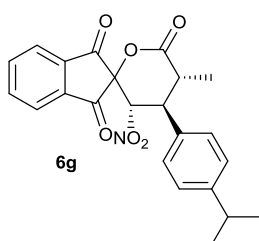

**6g** was obtained as a white solid in 72% yield for two steps after flash chromatography and the enantiomeric excess was determined to be 98% by HPLC on Chiralpak OD-H column (10% 2-propanol/n-hexane, 1 mL/min), UV 254 nm,  $t_{\text{minor}} = 16.32$  min,  $t_{\text{major}} = 18.03$  min. m.p. 156-158 °C;  $[\alpha]_{\text{D}}^{20}$

-117.2 ( $c = 0.10$  in  $\text{CH}_2\text{Cl}_2$ );  $^1\text{H}$  NMR (400 MHz,  $\text{CDCl}_3$ ):  $\delta = 8.13$ -8.05 (m, 2H), 8.02-7.94 (m, 2H), 7.23-7.21 (m, 2H), 7.17-7.15 (m, 2H), 5.60 (d,  $J = 12.4$  Hz, 1H), 4.11 (t,  $J = 12.0$  Hz, 1H), 3.06-2.98 (m, 1H), 2.92-2.85 (m, 1H), 1.39 (d,  $J = 6.8$  Hz, 3H), 1.23 (s, 3H), 1.22 (s, 3H) ppm;  $^{13}\text{C}$  NMR (100 MHz,  $\text{CDCl}_3$ ):  $\delta = 192.31, 190.08, 169.74, 149.73, 141.17, 140.20, 137.95, 137.43, 132.58, 127.63, 127.54, 124.98, 124.70, 87.36, 77.23, 77.10, 46.21, 41.52, 33.75, 23.81, 14.78$  ppm; ESI HRMS: calcd. For  $\text{C}_{23}\text{H}_{21}\text{NO}_6 + \text{H}$  408.1447, found 408.1450.

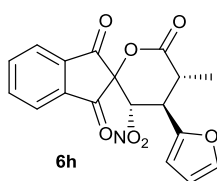

**6h** was obtained as a white solid in 66% yield for two steps after flash chromatography and the enantiomeric excess was determined to be 95% by HPLC on Chiralpak OD-H column (20% 2-propanol/n-hexane, 1 mL/min), UV 220 nm,  $t_{\text{major}} = 8.85$  min,  $t_{\text{minor}} = 18.05$  min. m.p. 152-154 °C;  $[\alpha]_{\text{D}}^{20}$

-106.2 ( $c = 0.09$  in  $\text{CH}_2\text{Cl}_2$ );  $^1\text{H}$  NMR (400 MHz,  $\text{CDCl}_3$ ):  $\delta = 8.13$ -8.06 (m, 2H), 8.02-7.95 (m, 2H), 7.45 (s, 1H), 6.33-6.28 (m, 2H), 5.69 (d,  $J = 12.0$  Hz, 1H), 4.34 (t,  $J = 11.6$  Hz, 1H), 3.28-3.20 (m, 1H), 1.45 (d,  $J = 6.8$  Hz, 3H) ppm;  $^{13}\text{C}$  NMR (100 MHz,  $\text{CDCl}_3$ ):  $\delta = 192.48, 189.77, 169.22, 147.41,$

143.68, 141.09, 140.27, 137.88, 137.47, 125.03, 124.76, 110.77, 110.70, 84.91, 76.18, 40.69, 38.95, 14.94 ppm; ESI HRMS: calcd. For  $C_{18}H_{13}NO_7+Na$  378.0590, found 378.0593.

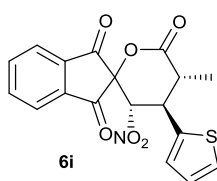

**6i** was obtained as a white solid in 69% yield for two steps after flash chromatography and the enantiomeric excess was determined to be 97% by HPLC on Chiralpak OD-H column (10% 2-propanol/n-hexane, 1 mL/min), UV 254 nm,  $t_{\text{minor}} = 21.08$  min,  $t_{\text{major}} = 27.83$  min. m.p. 156-158 °C;  $[\alpha]_D^{20} -125.8$  ( $c = 0.14$  in  $CH_2Cl_2$ );  $^1H$  NMR (400 MHz,  $CDCl_3$ ):  $\delta = 8.13-8.06$  (m, 2H), 8.01-7.94 (m, 2H), 7.33 (s, 1H), 6.97 (s, 2H), 5.54 (d,  $J = 12.0$  Hz, 1H), 4.52 (t,  $J = 11.6$  Hz, 1H), 3.07-3.05 (m, 1H), 1.49 (d,  $J = 6.4$  Hz, 3H) ppm;  $^{13}C$  NMR (100 MHz,  $CDCl_3$ ):  $\delta = 192.26, 189.65, 168.82, 141.09, 140.20, 138.35, 138.02, 137.54, 127.78, 127.48, 126.32, 125.03, 124.73, 88.19, 76.78, 42.82, 42.36, 14.92$  ppm; ESI HRMS: calcd. For  $C_{18}H_{13}NO_6S+Na$  394.0361, found 394.0357.

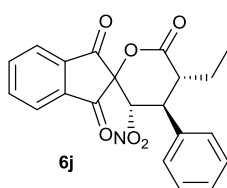

**6j** was obtained as a white solid in 78% yield for two steps after flash chromatography and the enantiomeric excess was determined to be 99% by HPLC on Kromasil CelluCoat column (20% 2-propanol/n-hexane, 1 mL/min), UV 254 nm,  $t_{\text{minor}} = 8.15$  min,  $t_{\text{major}} = 13.39$  min. m.p. 169-171 °C;  $[\alpha]_D^{20} -94.7$  ( $c = 0.09$  in  $CH_2Cl_2$ );  $^1H$  NMR (400 MHz,  $CDCl_3$ ):  $\delta = 8.12-8.05$  (m, 2H), 8.01-7.93 (m, 2H), 7.40-7.32 (m, 3H), 7.28-7.26 (m, 2H), 5.61 (d,  $J = 12.0$  Hz, 1H), 4.44 (t,  $J = 12.0$  Hz, 1H), 3.12-3.08 (m, 1H), 2.08-2.02 (m, 1H), 1.56-1.48 (m, 1H), 1.12 (t,  $J = 7.6$  Hz, 3H) ppm;  $^{13}C$  NMR (100 MHz,  $CDCl_3$ ):  $\delta = 192.19, 190.11, 168.56, 141.20, 140.11, 137.96, 137.41, 135.30, 129.52, 129.02, 127.69, 124.96, 124.67, 87.75, 77.23, 46.68, 42.77, 21.08, 9.71$  ppm; ESI HRMS: calcd. For  $C_{21}H_{17}NO_6+Na$  402.0954, found 402.0955.

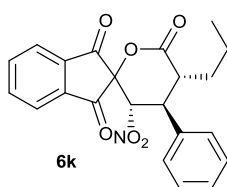

**6k** was obtained as a white solid in 75% yield for two steps after flash chromatography and the enantiomeric excess was determined to be 99% by HPLC on Chiralpak AD-H column (10% 2-propanol/n-hexane, 1 mL/min), UV 220 nm,  $t_{\text{major}} = 11.22$  min,  $t_{\text{minor}} = 12.98$  min. m.p. 155-156 °C;  $[\alpha]_D^{20} -91.8$  ( $c = 0.08$  in  $CH_2Cl_2$ );  $^1H$  NMR (400 MHz,  $CDCl_3$ ):  $\delta = 8.12-8.05$  (m, 2H), 8.02-7.94 (m, 2H), 7.41-7.33 (m, 3H), 7.27-7.26 (m, 2H), 5.59 (d,  $J = 12.4$  Hz, 1H), 4.39 (t,  $J = 12.0$  Hz, 1H), 3.13-3.08 (m, 1H), 1.92-1.85 (m, 1H), 1.69-1.46 (m, 3H), 0.87 (t,  $J = 7.2$  Hz, 3H) ppm;  $^{13}C$  NMR (100 MHz,  $CDCl_3$ ):

$\delta$  = 191.23, 189.06, 167.79, 140.16, 139.10, 136.93, 136.39, 134.37, 128.47, 127.98, 126.69, 123.92, 123.63, 86.76, 76.21, 44.71, 42.57, 29.46, 17.86, 13.05 ppm; ESI HRMS: calcd. For  $C_{22}H_{19}NO_6+Na$  416.1110, found 416.1113.

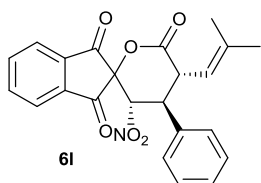

**6I** was obtained as a white solid in 60% yield for two steps after flash chromatography and the enantiomeric excess was determined to be 99% by HPLC on Chiralpak OD-H column (15% 2-propanol/n-hexane, 1 mL/min), UV 220 nm,  $t_{\text{minor}}$  = 14.76 min,  $t_{\text{major}}$  = 15.86 min. m.p. 162-164 °C;  $[\alpha]_D^{20}$

-125.2 ( $c$  = 0.10 in  $CH_2Cl_2$ );  $^1H$  NMR (400 MHz,  $CDCl_3$ ):  $\delta$  = 8.13-8.06 (m, 2H), 8.02-7.94 (m, 2H), 7.36-7.27 (m, 3H), 7.24-7.22 (m, 2H), 5.75 (d,  $J$  = 12.4 Hz, 1H), 5.36 (d,  $J$  = 9.2 Hz, 1H), 4.24 (t,  $J$  = 12.0 Hz, 1H), 3.81 (dd,  $J$  = 10.8 Hz,  $J$  = 9.2 Hz, 1H), 1.68 (s, 3H), 1.14 (s, 3H) ppm;  $^{13}C$  NMR (100 MHz,  $CDCl_3$ ):  $\delta$  = 192.31, 189.98, 168.32, 141.18, 140.23, 139.57, 137.95, 137.47, 135.32, 129.13, 128.69, 127.97, 124.98, 124.72, 117.60, 86.67, 77.22, 46.55, 46.03, 25.53, 17.78 ppm; ESI HRMS: calcd. For  $C_{23}H_{19}NO_6+Na$  428.1110, found 428.1107.

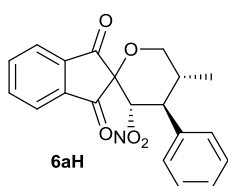

**6aH** was obtained as a white solid in 75% yield for two steps after flash chromatography and the enantiomeric excess was determined to be 97% by HPLC on Chiralpak AD-H column (10% 2-propanol/n-hexane, 1 mL/min), UV 220 nm,  $t_{\text{major}}$  = 12.75 min,  $t_{\text{minor}}$  = 23.03 min. m.p. 183-184 °C;  $[\alpha]_D^{20}$  -145.8 ( $c$

= 0.08 in  $CH_2Cl_2$ );  $^1H$  NMR (400 MHz,  $CDCl_3$ ):  $\delta$  = 8.06-8.01 (m, 2H), 7.93-7.86 (m, 2H), 7.37-7.28 (m, 5H), 5.41 (d,  $J$  = 12.0 Hz, 1H), 4.25 (t,  $J$  = 12.0 Hz, 1H), 3.93 (dd,  $J$  = 12.0 Hz,  $J$  = 5.2 Hz, 1H), 3.85 (t,  $J$  = 12.0 Hz, 1H), 2.35-2.27 (m, 1H), 0.78 (d,  $J$  = 6.4 Hz, 3H) ppm;  $^{13}C$  NMR (100 MHz,  $CDCl_3$ ):  $\delta$  = 194.83, 193.66, 141.50, 140.09, 137.09, 137.04, 136.60, 128.94, 127.99, 124.49, 124.16, 88.45, 73.97, 69.77, 47.58, 36.19, 13.93 ppm; ESI HRMS: calcd. For  $C_{20}H_{17}NO_5+Na$  374.1004, found 374.1007.

### 3. Screening studies to improve the yield of hexahydrofuro[2,3-*b*]pyran derivatives **7**<sup>a</sup>

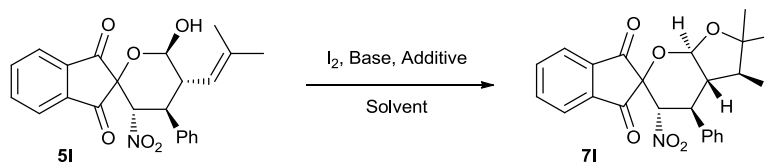

| entry    | Base                            | additive  | Solvent <sup>b</sup>    | Time (h) | Yield <sup>c</sup> (%) | ee <sup>d</sup> |
|----------|---------------------------------|-----------|-------------------------|----------|------------------------|-----------------|
| 1        | Na <sub>2</sub> CO <sub>3</sub> | -         | THF                     | 12       | 49                     | 82              |
| 2        | K <sub>2</sub> CO <sub>3</sub>  | -         | THF                     | 12       | 45                     | 78              |
| 3        | NaHCO <sub>3</sub>              | -         | THF                     | 12       | 48                     | 95              |
| 4        | NaHCO <sub>3</sub>              | KI        | THF                     | 6        | 53                     | 96              |
| 5        | NaHCO <sub>3</sub>              | KI        | Dioxane                 | 8        | 31                     | 95              |
| 6        | NaHCO <sub>3</sub>              | KI        | DCM                     | 8        | 38                     | 96              |
| 7        | NaHCO <sub>3</sub>              | KI        | MeCN                    | 2        | 61                     | 97              |
| <b>8</b> | <b>NaHCO<sub>3</sub></b>        | <b>KI</b> | <b>MeCN<sup>e</sup></b> | <b>2</b> | <b>71</b>              | <b>97</b>       |

<sup>a</sup> Unless noted otherwise, reactions were performed with allylic hemiacetal **5X** (0.4 mmol), I<sub>2</sub> (1.2 mmol), Base (1.2mmol), and additive (0.04 mmol) at 0 °C in 4 mL solvent for the times specified (TLC monitoring). <sup>b</sup> The commercially available solvent was used without distillation or drying. <sup>c</sup> Isolated yield. <sup>d</sup> By chiral HPLC analysis. <sup>e</sup> The anhydrous acetonitrile was used.

### 4. General procedure for the asymmetric synthesis of **7**

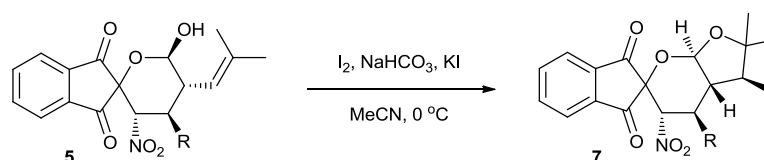

To a solution of allylic hemiacetal **5** (0.4 mmol) in 4 mL anhydrous MeCN were added I<sub>2</sub> (304.8 mg, 1.2 mmol), NaHCO<sub>3</sub> (100.8 mg, 1.2 mmol), and KI (6.6 mg, 0.04 mmol). The mixture was stirred for the times specified (TLC monitoring) at 0 °C. Ethyl acetate (20 mL) was added and the resulting mixture washed with saturated aqueous sodium thiosulfate (30 mL). The separated aqueous phase was extracted with ether (3×10 mL) and the combined organic solution dried and evaporated. The residue was purified by flash chromatography on silica gel (petroleum ether/ethyl acetate = 20:1) to give tetracyclic hexahydrofuro[2,3-*b*]pyran-based compounds **7**. For the reason that the major and minor diastereomers of compounds **7** could not be isolated in pure form by column chromatography, the dr values of **7** were calculated by chiral HPLC analysis.



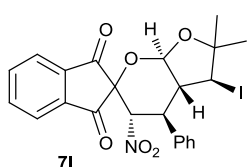

**7l** was obtained as a white solid in 71% yield for two steps after flash chromatography and the enantiomeric excess was determined to be 97% by HPLC on Chiralpak AD-H column (20% 2-propanol/n-hexane, 1 mL/min), UV 254 nm,  $t_{\text{major}} = 10.09$  min,  $t_{\text{minor}} = 12.14$  min. m.p. 194-196 °C;  $[\alpha]_{\text{D}}^{20}$

-124.2 ( $c = 0.08$  in  $\text{CH}_2\text{Cl}_2$ );  $^1\text{H}$  NMR (400 MHz,  $\text{CDCl}_3$ ):  $\delta = 8.09$ -8.01 (m, 2H), 7.92-7.90 (m, 2H), 7.44-7.31 (m, 5H), 5.66 (d,  $J = 8.0$  Hz, 1H), 5.56 (d,  $J = 10.8$  Hz, 1H), 4.18 (t,  $J = 11.6$  Hz, 1H), 3.94 (d,  $J = 12.4$  Hz, 1H), 2.53 (td,  $J = 12.0$  Hz,  $J = 8.0$  Hz, 1H), 1.51 (s, 3H), 1.36 (s, 3H) ppm;  $^{13}\text{C}$  NMR (100 MHz,  $\text{CDCl}_3$ ):  $\delta = 193.71, 171.25, 140.76, 140.41, 137.01, 136.99, 131.77, 129.03, 128.86, 128.66, 124.82, 124.60, 100.20, 85.95, 85.75, 52.08, 45.90, 30.61, 26.68, 25.22$  ppm; ESI HRMS: calcd. For  $\text{C}_{23}\text{H}_{20}\text{INO}_6 + \text{Na}$  556.0233, found 556.0231.

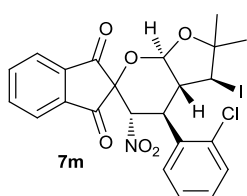

**7m** was obtained as a white solid in 69% yield for two steps after flash chromatography and the enantiomeric excess was determined to be 94% by HPLC on Chiralpak AD-H column (20% 2-propanol/n-hexane, 1 mL/min), UV 254 nm,  $t_{\text{major}} = 6.56$  min,  $t_{\text{minor}} = 12.24$  min. m.p. 206-207 °C;  $[\alpha]_{\text{D}}^{20}$

-149.5 ( $c = 0.32$  in  $\text{CH}_2\text{Cl}_2$ );  $^1\text{H}$  NMR (400 MHz,  $\text{CDCl}_3$ ):  $\delta = 8.10$ -8.02 (m, 2H), 7.93-7.92 (m, 2H), 7.51-7.47 (m, 2H), 7.38-7.25 (m, 2H), 5.65-5.62 (m, 2H), 5.05 (t,  $J = 11.6$  Hz, 1H), 4.07 (d,  $J = 12.4$  Hz, 1H), 2.41 (td,  $J = 12.0$  Hz,  $J = 8.0$  Hz, 1H), 1.49 (s, 3H), 1.38 (s, 3H) ppm;  $^{13}\text{C}$  NMR (100 MHz,  $\text{CDCl}_3$ ):  $\delta = 193.44, 191.14, 140.73, 140.41, 136.98, 136.94, 136.21, 132.80, 130.14, 129.25, 127.31, 126.78, 124.88, 124.68, 100.26, 85.95, 84.30, 81.83, 53.04, 40.26, 30.59, 26.72, 24.99$  ppm; ESI HRMS: calcd. For  $\text{C}_{23}\text{H}_{19}\text{ClINO}_5 + \text{Na}$  589.9843, found 589.9841.

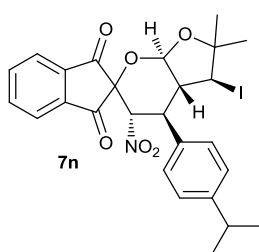

**7n** was obtained as a white solid in 65% yield for two steps after flash chromatography and the enantiomeric excess was determined to be 98% by HPLC on Kromasil CelluCoat column (5% 2-propanol/n-hexane, 1 mL/min), UV 220 nm,  $t_{\text{minor}} = 9.09$  min,  $t_{\text{major}} = 10.13$  min. m.p. 171-173 °C;  $[\alpha]_{\text{D}}^{20}$

-139.6 ( $c = 0.18$  in  $\text{CH}_2\text{Cl}_2$ );  $^1\text{H}$  NMR (400 MHz,  $\text{CDCl}_3$ ):  $\delta = 8.09$ -8.01 (m, 2H), 7.93-7.90 (m, 2H), 7.34-7.24 (m, 4H), 5.66 (d,  $J = 8.0$  Hz, 1H), 5.55 (d,  $J = 11.2$  Hz, 1H), 4.15 (t,  $J = 11.6$  Hz, 1H), 3.92 (d,  $J = 12.4$  Hz, 1H), 2.94-2.87 (m, 1H), 2.50 (td,  $J = 12.4$  Hz,  $J = 8.0$  Hz, 1H), 1.51 (s, 3H), 1.36 (s, 3H), 1.24 (s, 3H), 1.22 (s, 3H) ppm;  $^{13}\text{C}$  NMR (100 MHz,  $\text{CDCl}_3$ ):  $\delta = 193.76, 191.37, 149.66, 140.78, 140.42, 137.00, 131.32, 126.88, 125.38, 124.81, 124.58, 100.21,$

86.08, 85.73, 52.11, 45.53, 33.75, 30.60, 26.68, 25.20, 24.00 ppm; ESI HRMS: calcd. For  $C_{26}H_{26}INO_6+H$  576.0883, found 576.0886.

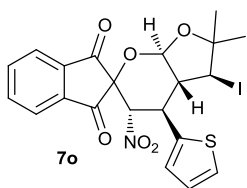

**7o** was obtained as a white solid in 61% yield for two steps after flash chromatography and the enantiomeric excess was determined to be 97% by HPLC on Kromasil CelluCoat column (5% 2-propanol/n-hexane, 1 mL/min), UV 254 nm,  $t_{\text{minor}} = 14.13$  min,  $t_{\text{major}} = 28.33$  min. m.p. 188-190 °C;  $[\alpha]_D^{20}$

-157.6 ( $c = 0.06$  in  $CH_2Cl_2$ );  $^1H$  NMR (400 MHz,  $CDCl_3$ ):  $\delta = 8.10$ -8.00 (m, 2H), 7.95-7.90 (m, 2H), 7.30 (d,  $J = 5.2$  Hz, 1H), 7.13 (d,  $J = 3.2$  Hz, 1H), 7.02 (dd,  $J = 4.8$  Hz,  $J = 3.6$  Hz, 1H), 5.65 (d,  $J = 8.0$  Hz, 1H), 5.46 (d,  $J = 10.8$  Hz, 1H), 4.51 (t,  $J = 11.6$  Hz, 1H), 3.98 (d,  $J = 12.4$  Hz, 1H), 2.50 (td,  $J = 12.0$  Hz,  $J = 8.0$  Hz, 1H), 1.53 (s, 3H), 1.38 (s, 3H) ppm;  $^{13}C$  NMR (100 MHz,  $CDCl_3$ ):  $\delta = 193.61, 190.93, 140.71, 140.42, 137.13, 137.06, 127.18, 125.12, 124.86, 124.63, 100.06, 89.88, 87.07, 85.84, 53.34, 30.60, 26.71, 24.91$  ppm; ESI HRMS: calcd. For  $C_{21}H_{18}INO_6S+Na$  561.9797, found 561.9798.

## 5. Crystal data of 6b

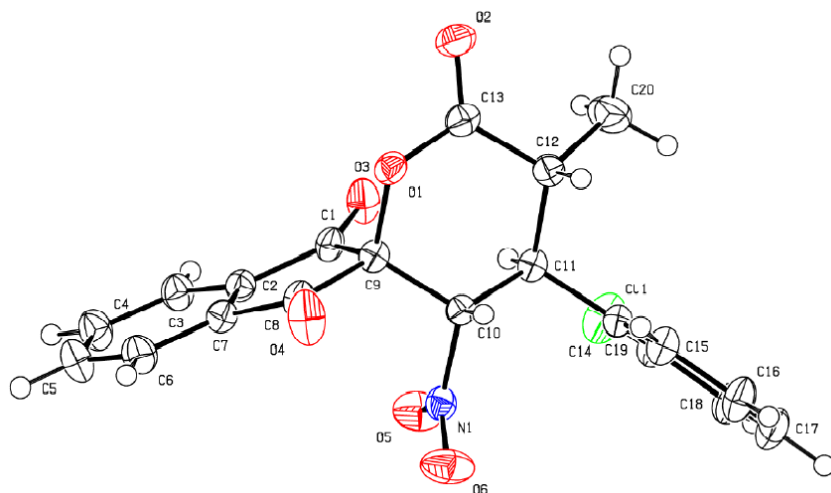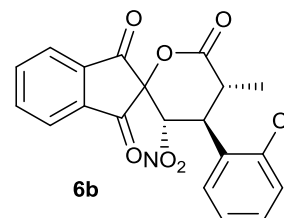

|                                             |                                                   |
|---------------------------------------------|---------------------------------------------------|
| Empirical formula                           | C <sub>20</sub> H <sub>14</sub> ClNO <sub>6</sub> |
| Formula weight                              | 399.77                                            |
| Temperature/K                               | 143(2)                                            |
| Crystal system                              | orthorhombic                                      |
| Space group                                 | P212121                                           |
| a/Å                                         | 8.1843(16)                                        |
| b/Å                                         | 10.679(2)                                         |
| c/Å                                         | 21.790(4)                                         |
| α/°                                         | 90.00                                             |
| β/°                                         | 90.00                                             |
| γ/°                                         | 90.00                                             |
| Volume/Å <sup>3</sup>                       | 1904.4(6)                                         |
| Z                                           | 4                                                 |
| ρ <sub>calc</sub> /mm <sup>3</sup>          | 1.394                                             |
| m/mm <sup>-1</sup>                          | 0.238                                             |
| F(000)                                      | 824.0                                             |
| Crystal size/mm <sup>3</sup>                | 0.4 × 0.38 × 0.37                                 |
| 2θ range for data collection                | 5.34 to 58.28 °                                   |
| Index ranges                                | -11 ≤ h ≤ 11, -14 ≤ k ≤ 13, -29 ≤ l ≤ 29          |
| Reflections collected                       | 16915                                             |
| Independent reflections                     | 5110[R(int) = 0.0281]                             |
| Data/restraints/parameters                  | 5110/0/254                                        |
| Goodness-of-fit on F <sup>2</sup>           | 1.000                                             |
| Final R indexes [I ≥ 2σ (I)]                | R1 = 0.0340, wR2 = 0.0802                         |
| Final R indexes [all data]                  | R1 = 0.0363, wR2 = 0.0819                         |
| Largest diff. peak/hole / e Å <sup>-3</sup> | 0.23/-0.30                                        |
| Flack parameter                             | 0.03(5)                                           |

## 6. Proposed catalytic cycles for the enantioselective transformation

✂ In 2005, Yujiro Hayashi demonstrated that diphenylprolinol silyl ethers were efficient chiral secondary amine catalyst in the asymmetric Michael reaction of aldehydes and nitroalkenes. A reasonable transition state model has been proposed to explain the high diastereoselectivities and excellent enantioselectivities of this reaction. The Hayashi's transition state model can explain the absolute configuration of C2 ( $\alpha$ -position of CHO) and C3 ( $\beta$ -position of NO<sub>2</sub>). (ACIE. 2005, 44, 4212)

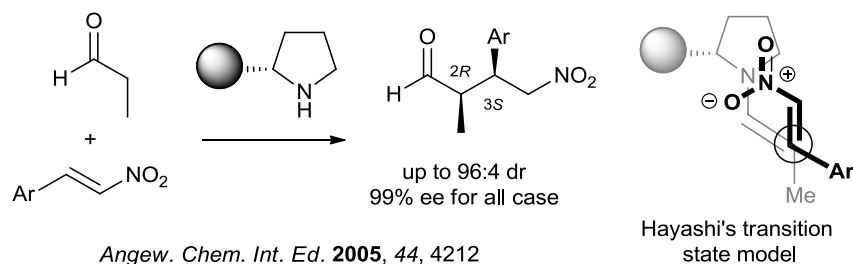

Based on Hayashi's transition state model, we proposed the plausible catalytic cycles and transition-state structures which were responsible for the enantioselective transformation:

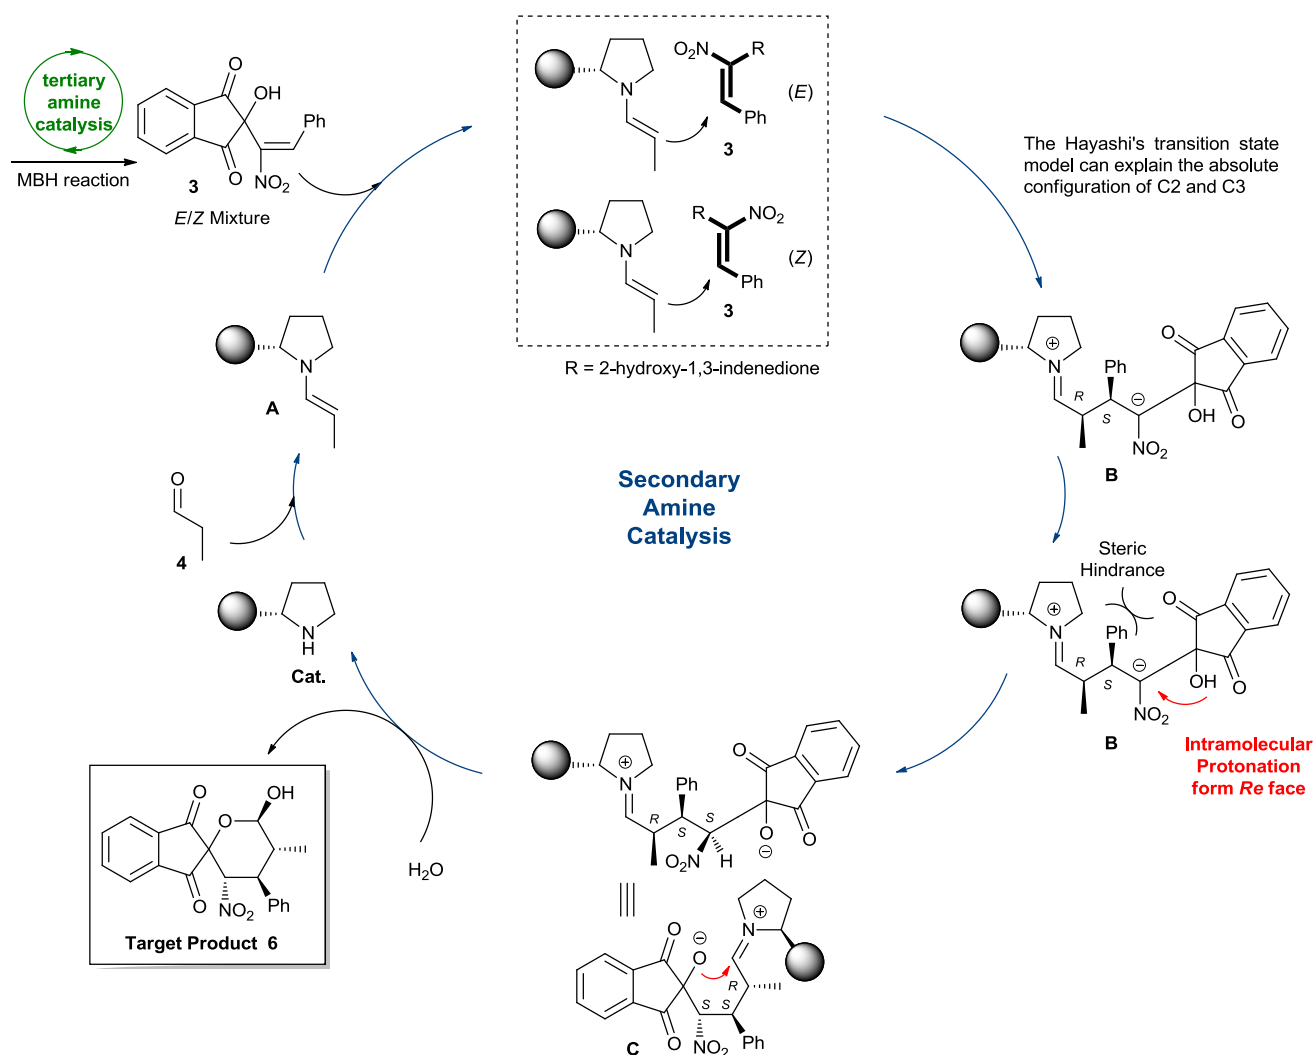

The plausible mechanism includes two catalytic cycles: tertiary amine catalysis and secondary amine catalysis. In the first catalytic cycle, the tertiary amine-catalyzed MBH reaction of conjugated nitroalkene with ninhydrin can provide tertiary alcohol intermediate **3** (E/Z mixtures), which then participates directly in the second catalytic cycle by serving as the receptor in an asymmetric Michael addition. The activated nucleophilic enamine specie **A** would be generated from aldehyde **4** and secondary amine catalyst. The transition state structure of asymmetric Michael addition between enamine **A** and nitroalkene derivative **3** is similar to Hyashi's model. Therefore, Zwitterion intermediate **B** could be obtained with good stereoselectivities at C2 ( $\alpha$ -position of CHO) and C3 ( $\beta$ -position of NO<sub>2</sub>). It is noteworthy that the E/Z configuration of MBH tertiary alcohol **3** will not affect the chirality of C4 ( $\alpha$ -position of NO<sub>2</sub>), owing to the generation of achiral carbanion at this position. Influenced by the steric hindrance effect of benzene ring at C3 position, intramolecular C4 protonation from *Re* face will afford Zwitterion intermediate **C** with high diastereoselectivity. Subsequent hydrolysis and hemi-acetalization provides the desired oxa-spirocyclic indanone **6** with excellent ee and good dr value, and the catalyst is regenerated.

## 7. NMR spectra and HPLC chromatograms

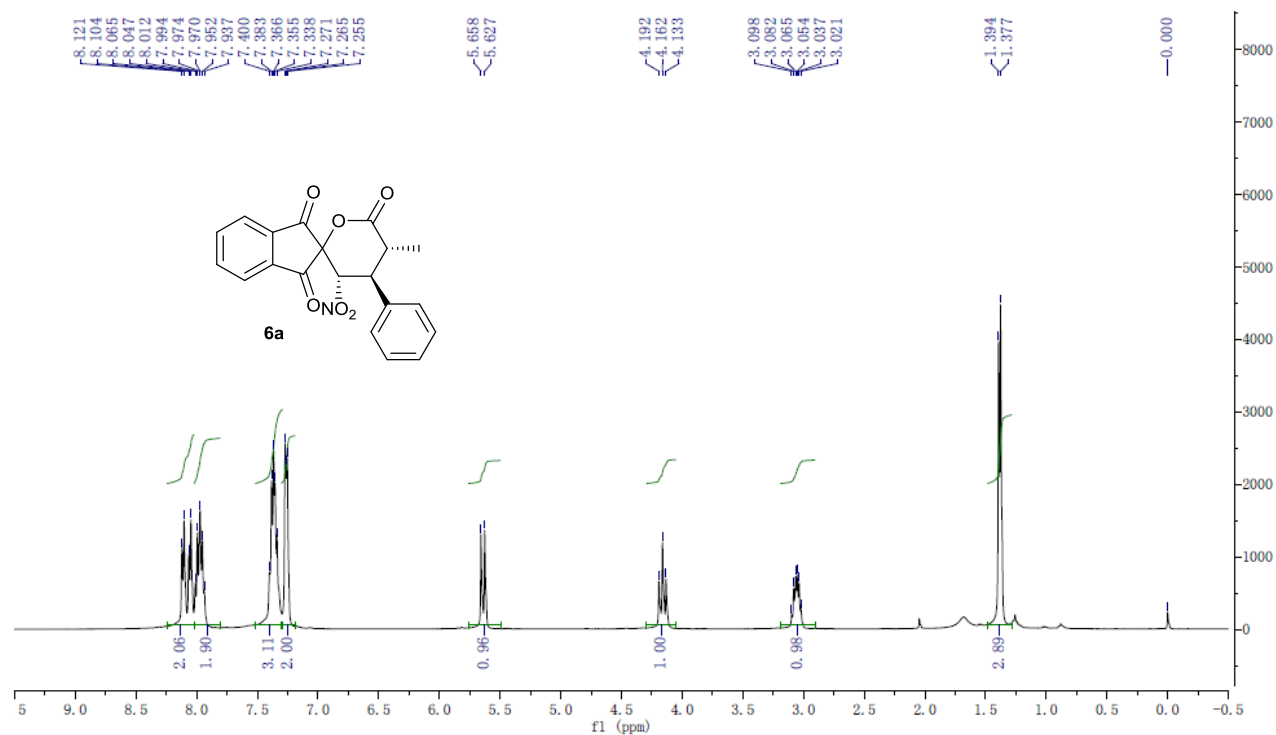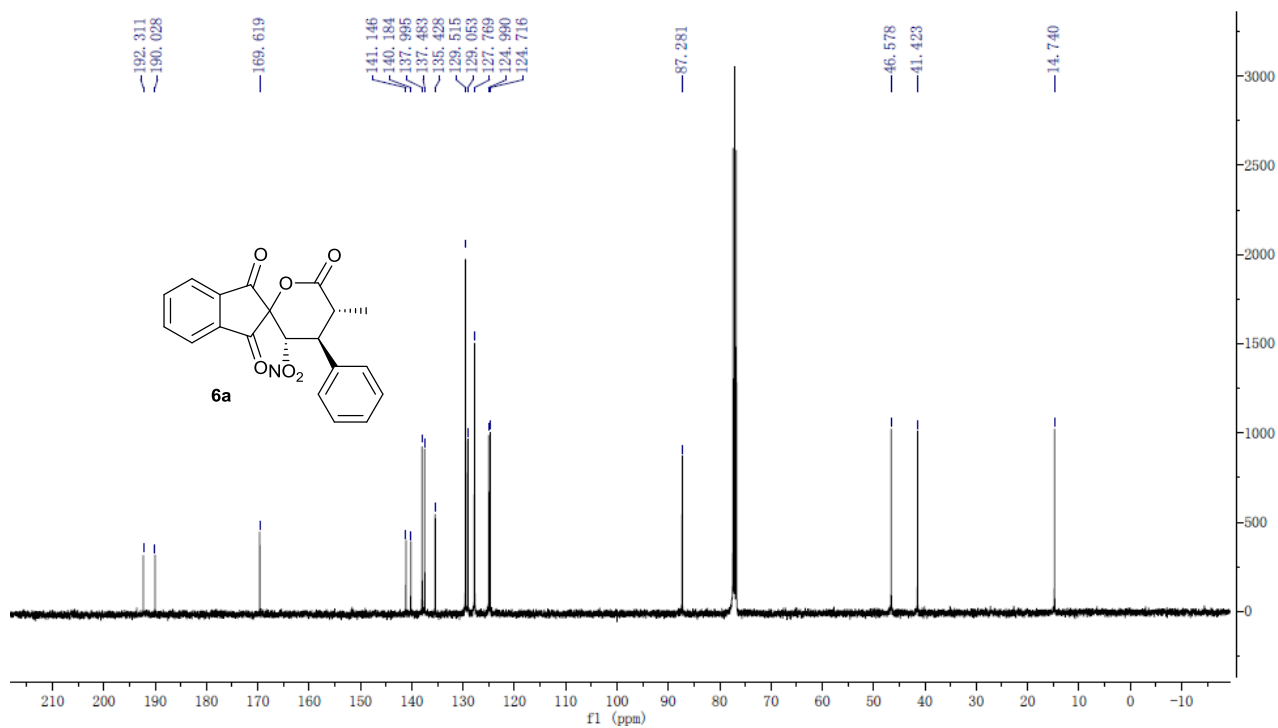

### Peak Analysis Report

| No. | Peak Name | Ret. Time (detected)<br>min | Area<br>mAU*min | Rel. Area<br>% | Height<br>mAU | Amount |
|-----|-----------|-----------------------------|-----------------|----------------|---------------|--------|
| 1   | n.a.      | 10.86                       | 100.687         | 50.30          | 250.073       | n.a.   |
| 2   | n.a.      | 12.03                       | 99.479          | 49.70          | 217.544       | n.a.   |

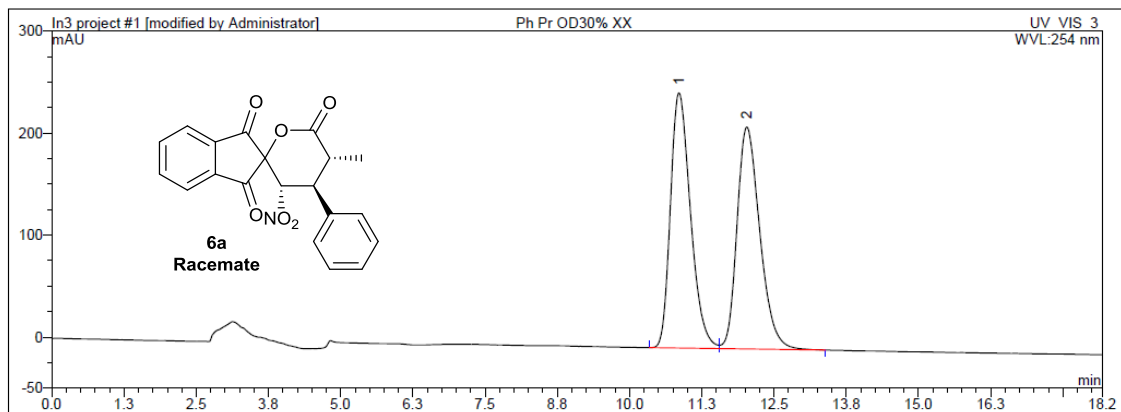

### Peak Analysis Report

| No. | Peak Name | Ret. Time (detected)<br>min | Area<br>mAU*min | Rel. Area<br>% | Height<br>mAU | Amount |
|-----|-----------|-----------------------------|-----------------|----------------|---------------|--------|
| 1   | n.a.      | 11.05                       | 5.913           | 3.66           | 16.395        | n.a.   |
| 2   | n.a.      | 12.11                       | 155.766         | 96.34          | 347.363       | n.a.   |

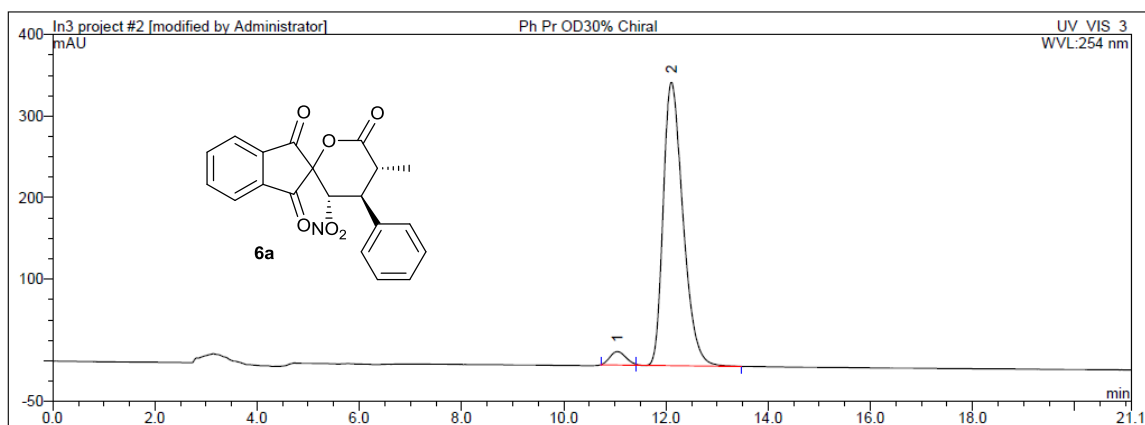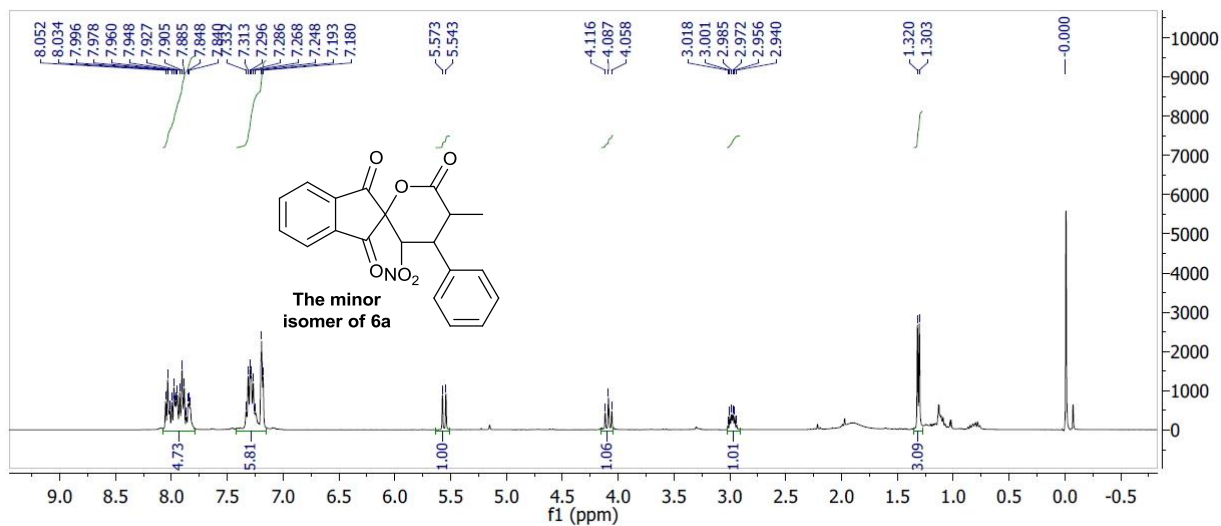

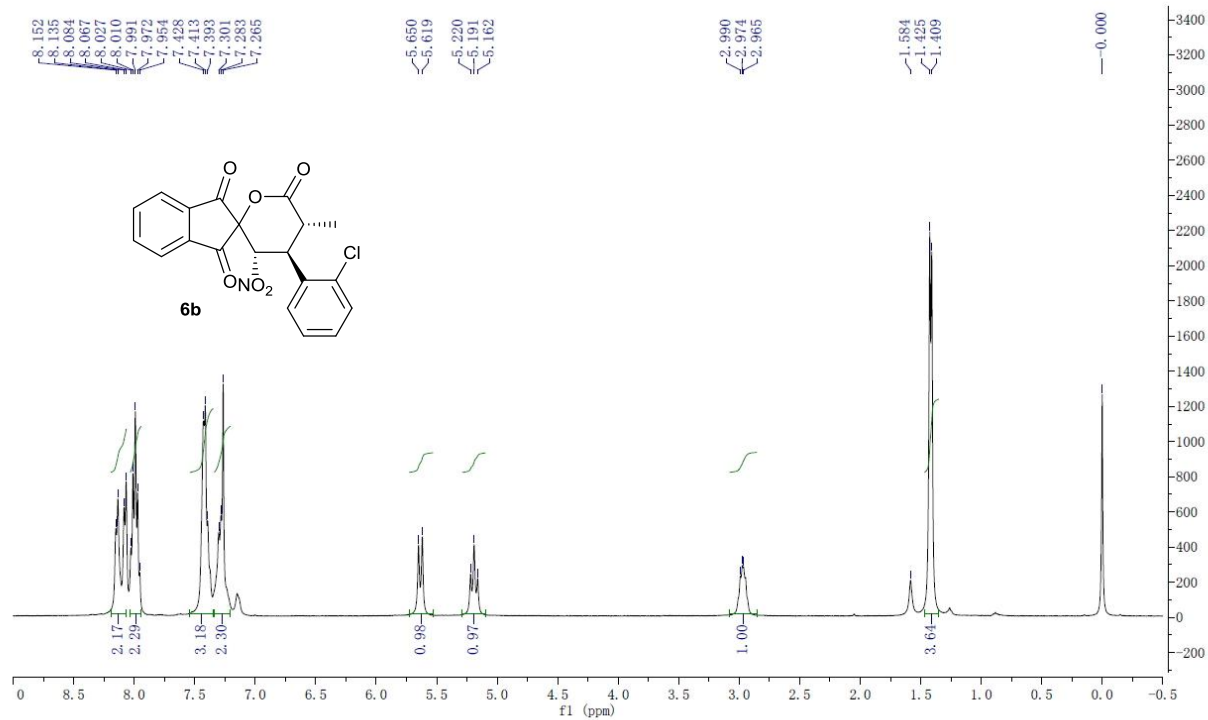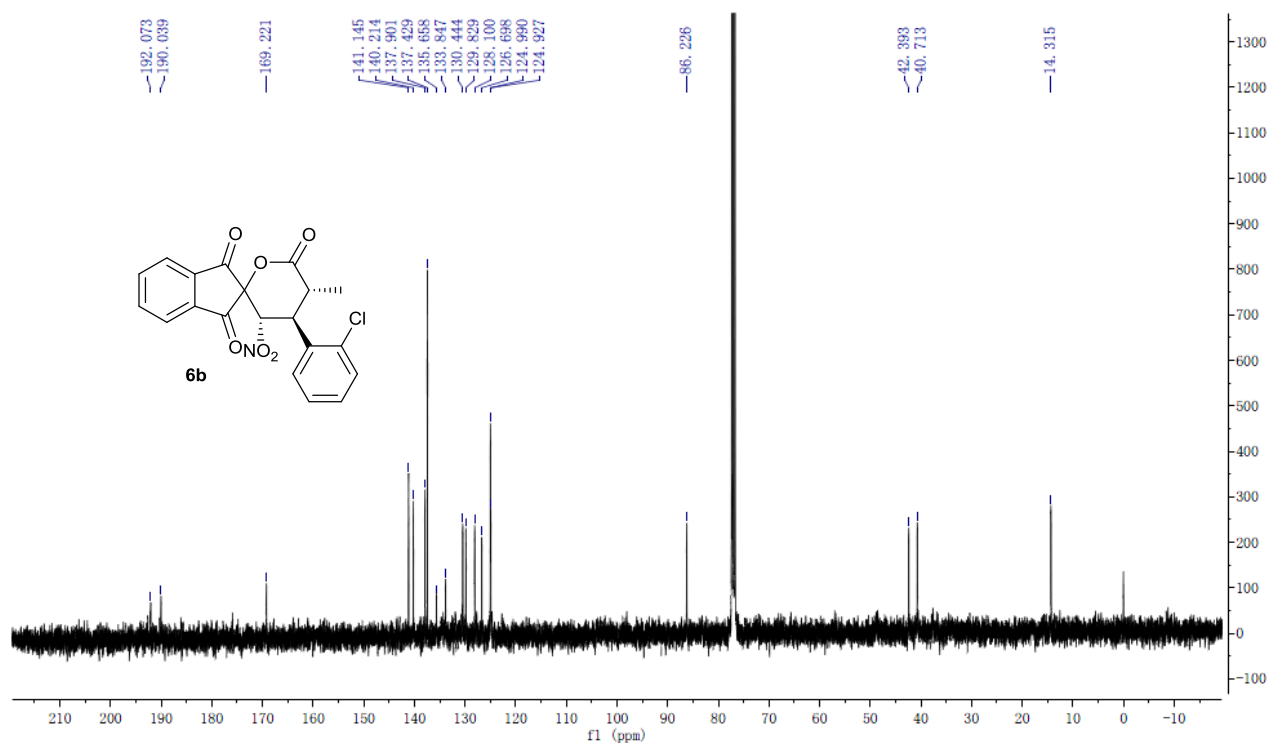



### Peak Analysis Report

| No. | Peak Name | Ret. Time (detected)<br>min | Area<br>mAU*min | Rel. Area<br>% | Height<br>mAU | Amount |
|-----|-----------|-----------------------------|-----------------|----------------|---------------|--------|
| 1   | n.a.      | 26.53                       | 376.848         | 49.53          | 301.463       | n.a.   |
| 2   | n.a.      | 28.82                       | 383.954         | 50.47          | 269.928       | n.a.   |

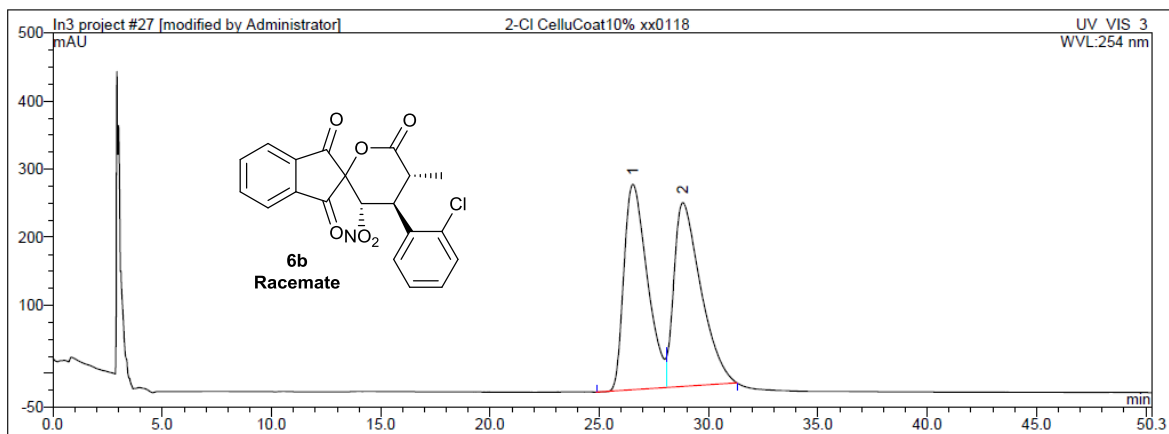

### Peak Analysis Report

| No. | Peak Name | Ret. Time (detected)<br>min | Area<br>mAU*min | Rel. Area<br>% | Height<br>mAU | Amount |
|-----|-----------|-----------------------------|-----------------|----------------|---------------|--------|
| 1   | n.a.      | 26.42                       | 1.508           | 0.17           | 2.785         | n.a.   |
| 2   | n.a.      | 28.33                       | 865.230         | 99.83          | 567.553       | n.a.   |

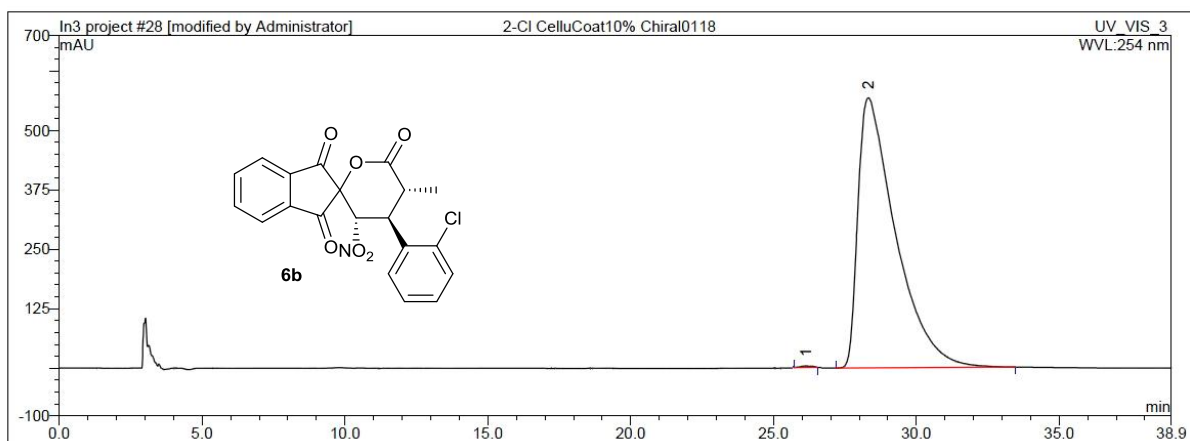

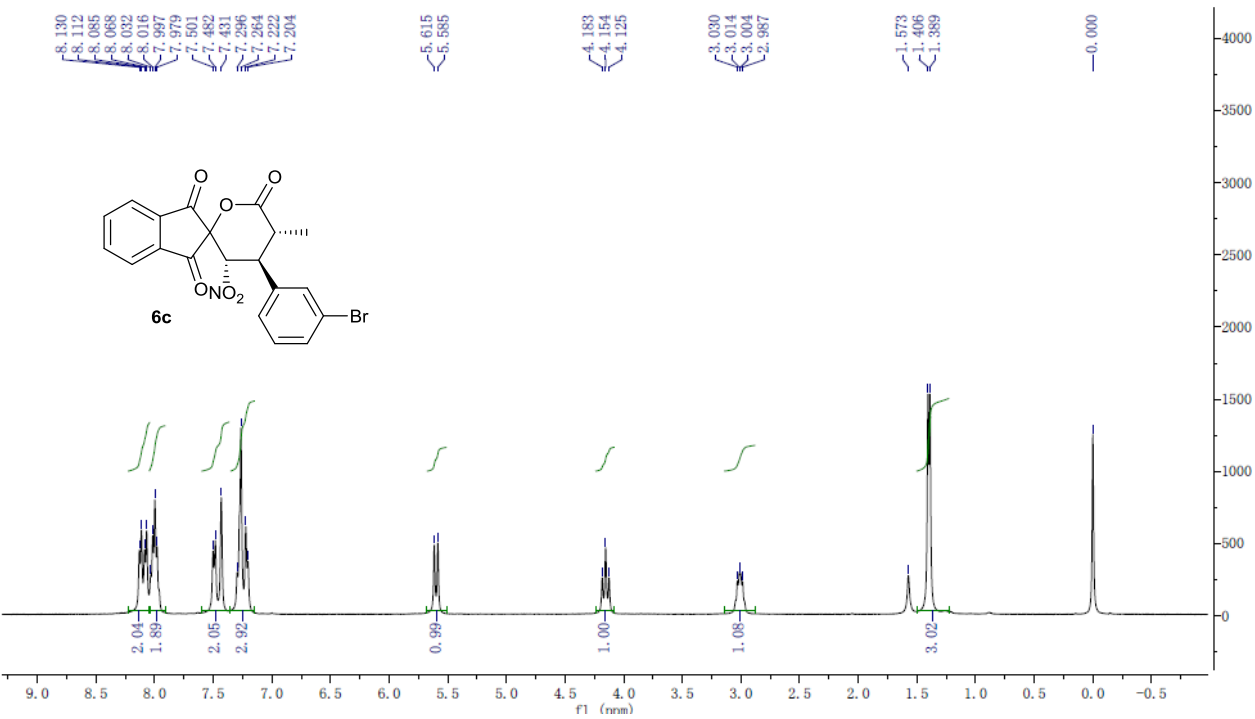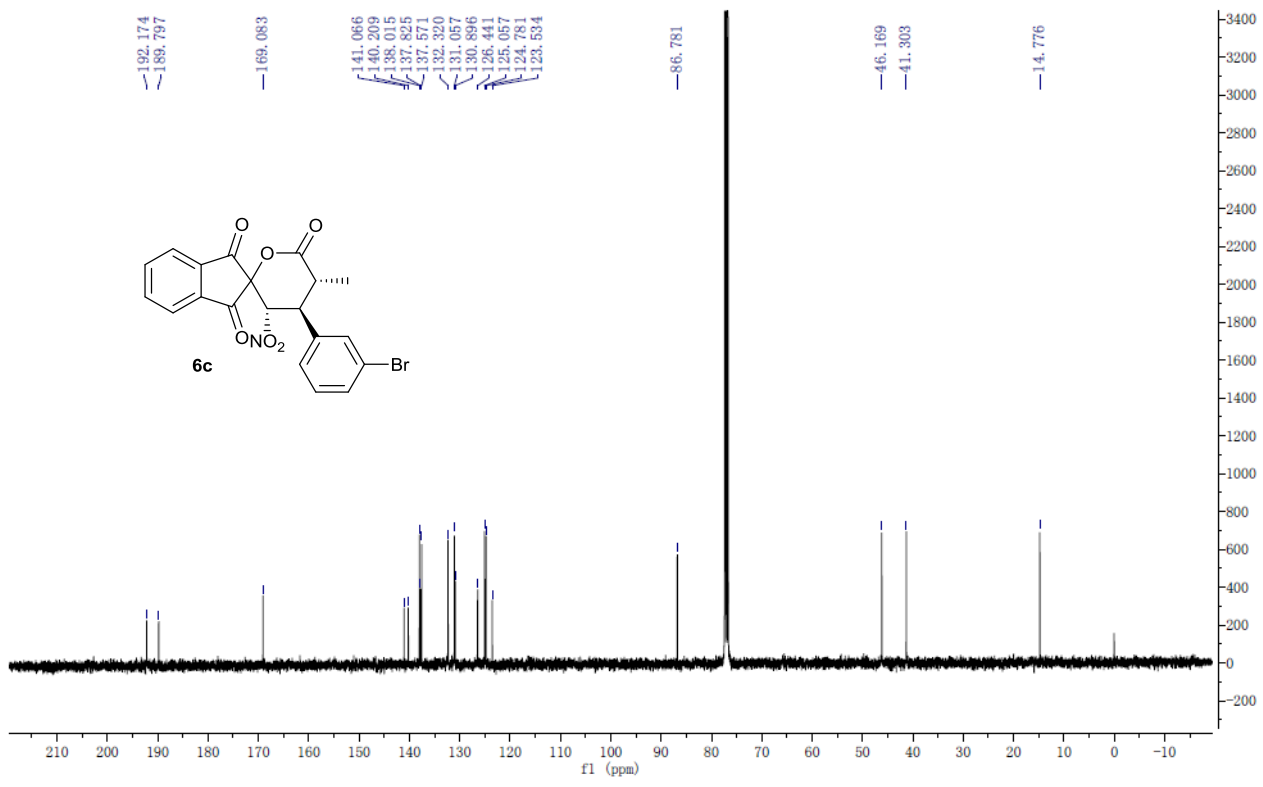

### Peak Analysis Report

| No. | Peak Name | Ret. Time (detected)<br>min | Area<br>mAU*min | Rel. Area<br>% | Height<br>mAU | Amount |
|-----|-----------|-----------------------------|-----------------|----------------|---------------|--------|
| 1   | n.a.      | 13.66                       | 41.322          | 49.80          | 81.882        | n.a.   |
| 2   | n.a.      | 14.79                       | 41.654          | 50.20          | 66.969        | n.a.   |

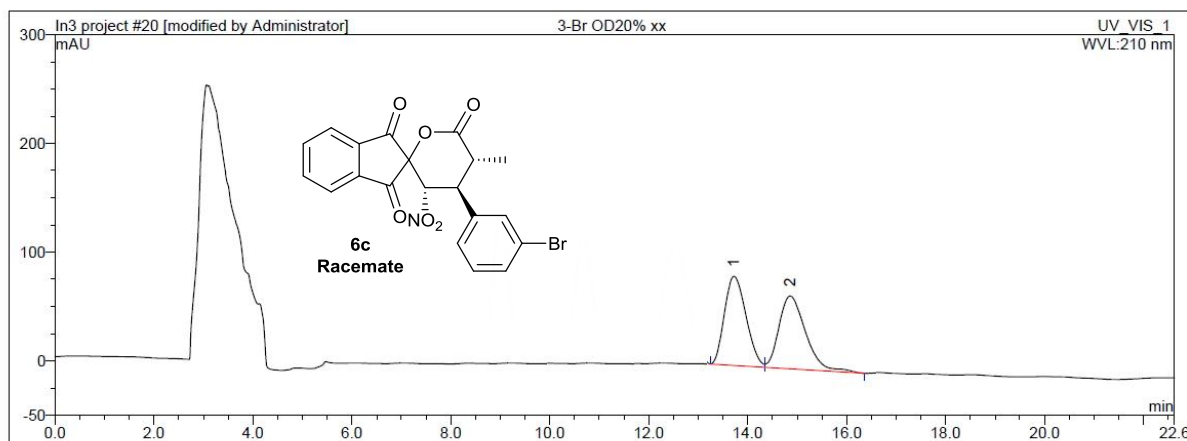

### Peak Analysis Report

| No. | Peak Name | Ret. Time (detected)<br>min | Area<br>mAU*min | Rel. Area<br>% | Height<br>mAU | Amount |
|-----|-----------|-----------------------------|-----------------|----------------|---------------|--------|
| 1   | n.a.      | 13.62                       | 1.383           | 0.71           | 2.471         | n.a.   |
| 2   | n.a.      | 14.97                       | 193.164         | 99.29          | 325.816       | n.a.   |

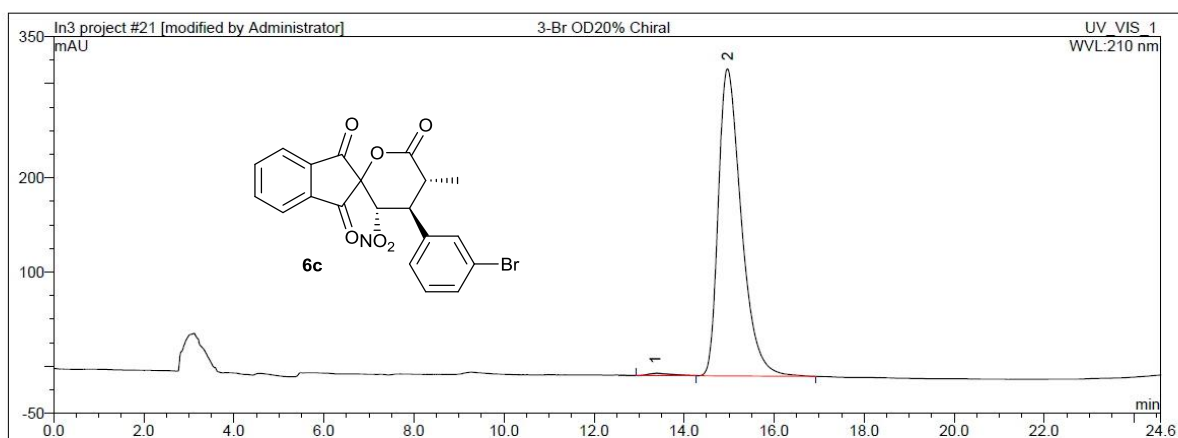

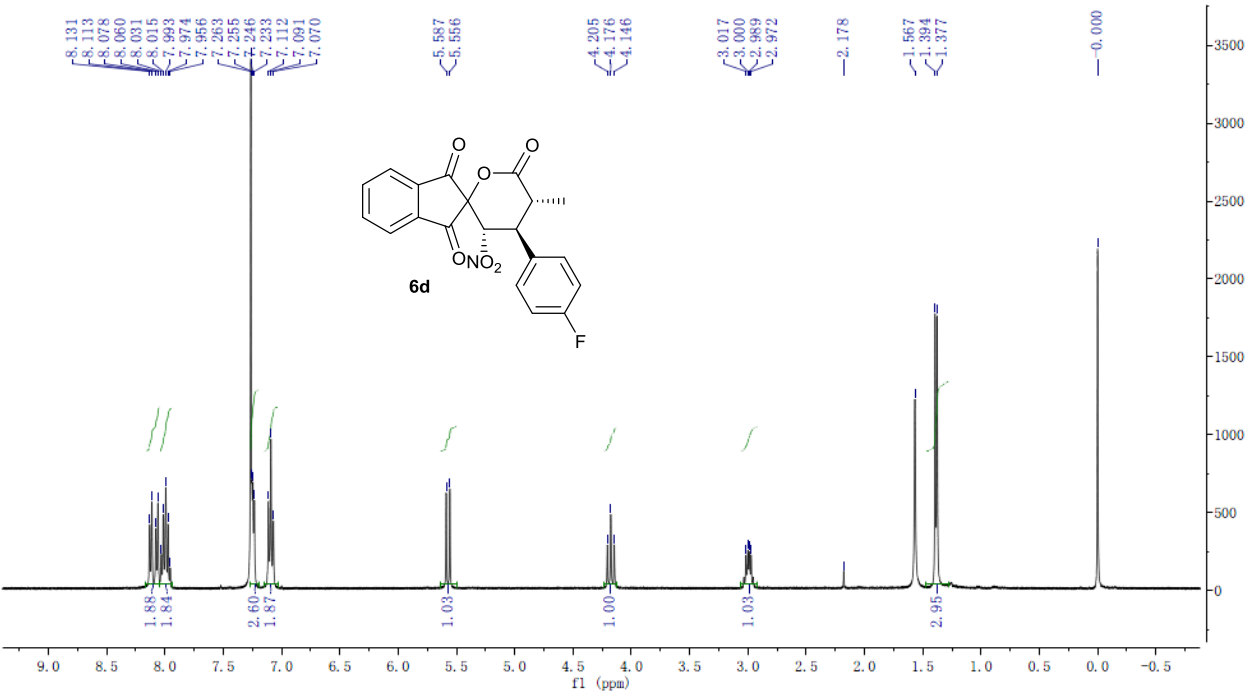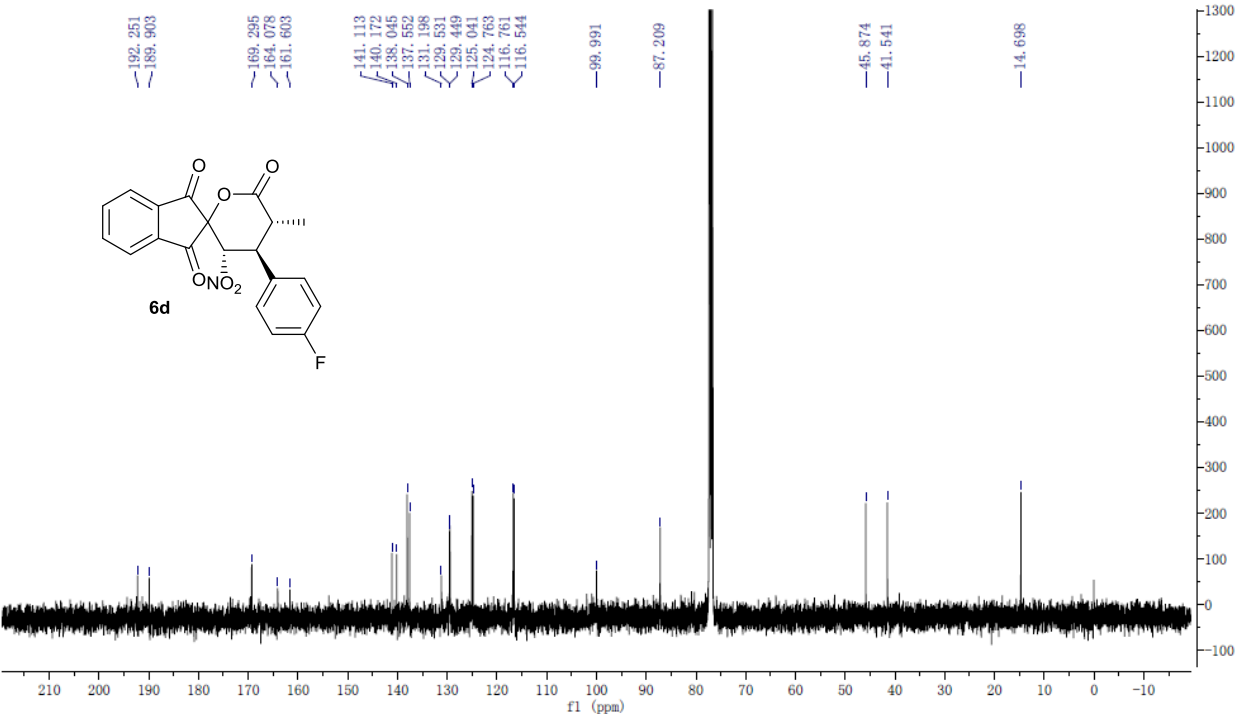

### Peak Analysis Report

| No. | Peak Name | Ret. Time (detected)<br>min | Area<br>mAU*min | Rel. Area<br>% | Height<br>mAU | Amount |
|-----|-----------|-----------------------------|-----------------|----------------|---------------|--------|
| 1   | n.a.      | 11.63                       | 42.711          | 50.47          | 103.008       | n.a.   |
| 2   | n.a.      | 13.27                       | 41.908          | 49.53          | 87.620        | n.a.   |

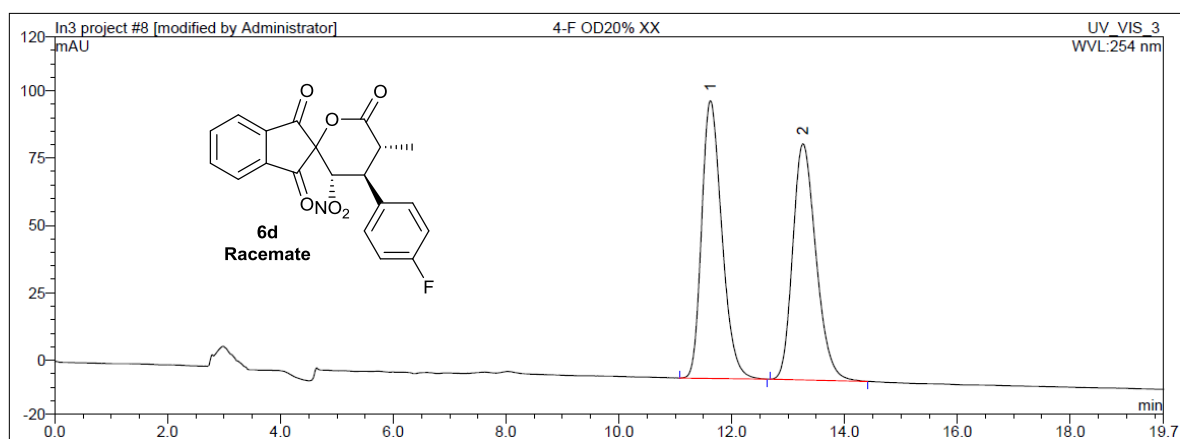

### Peak Analysis Report

| No. | Peak Name | Ret. Time (detected)<br>min | Area<br>mAU*min | Rel. Area<br>% | Height<br>mAU | Amount |
|-----|-----------|-----------------------------|-----------------|----------------|---------------|--------|
| 1   | n.a.      | 11.74                       | 5.833           | 1.40           | 12.197        | n.a.   |
| 2   | n.a.      | 13.13                       | 412.027         | 98.60          | 823.225       | n.a.   |

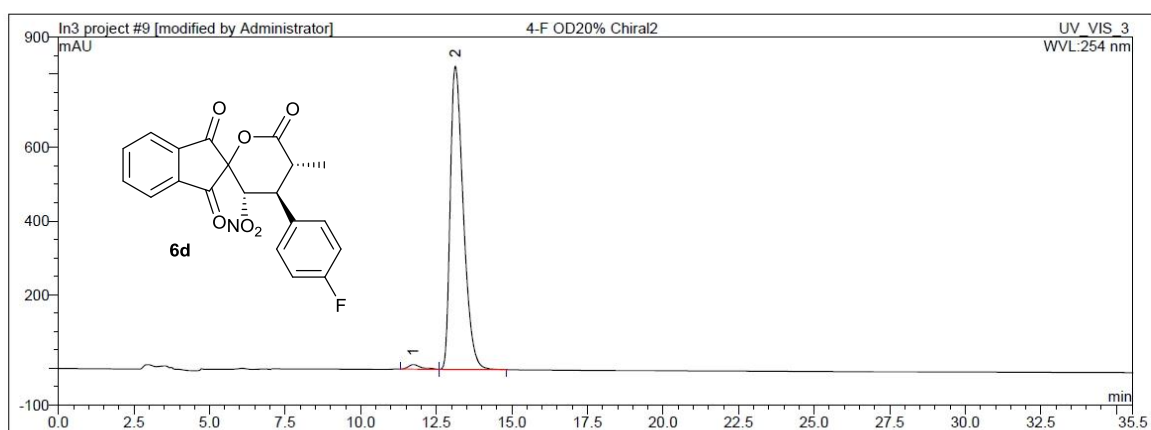

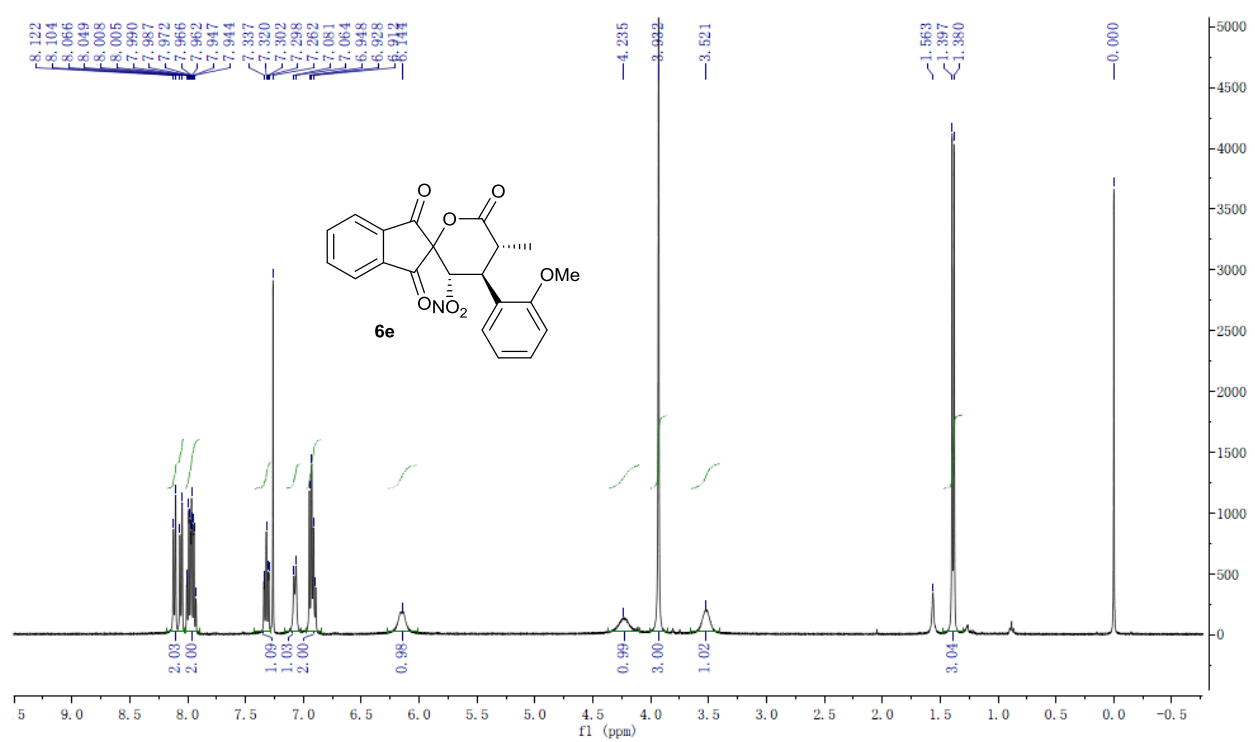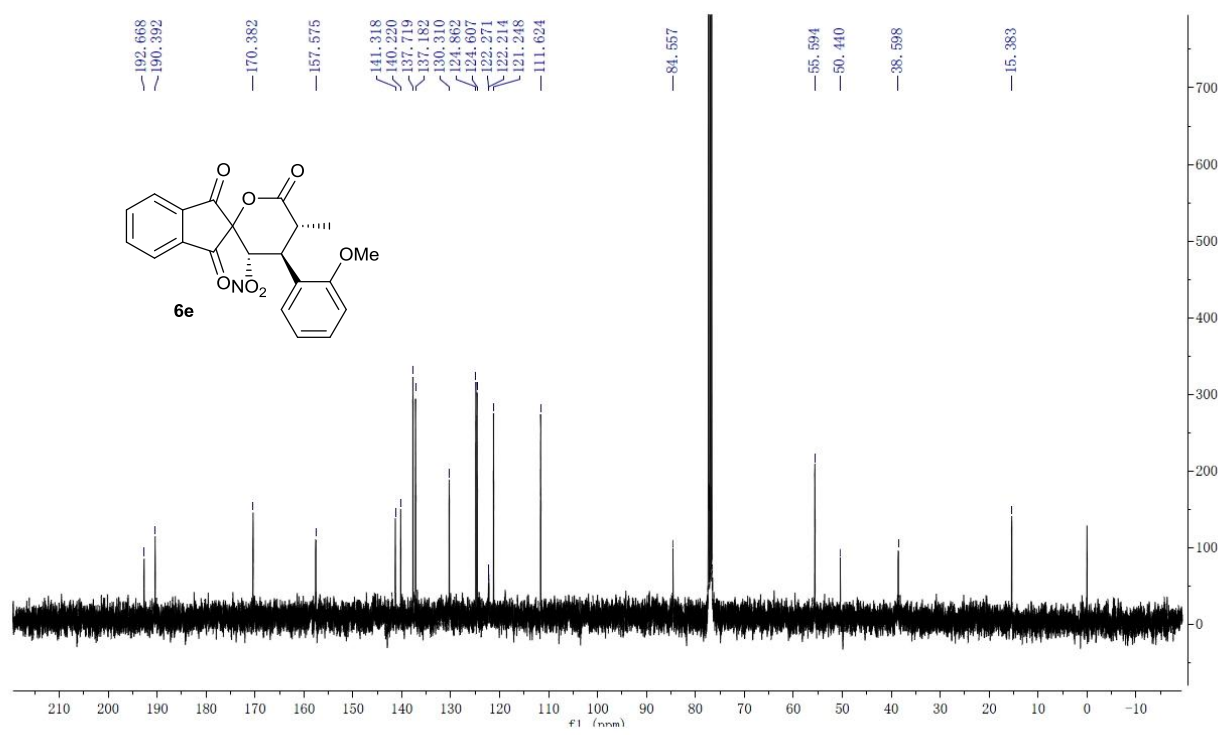

### Peak Analysis Report

| No. | Peak Name | Ret. Time (detected)<br>min | Area<br>mAU*min | Rel. Area<br>% | Height<br>mAU | Amount |
|-----|-----------|-----------------------------|-----------------|----------------|---------------|--------|
| 1   | n.a.      | 15.62                       | 39.256          | 50.28          | 84.166        | n.a.   |
| 2   | n.a.      | 17.55                       | 38.824          | 49.72          | 56.744        | n.a.   |

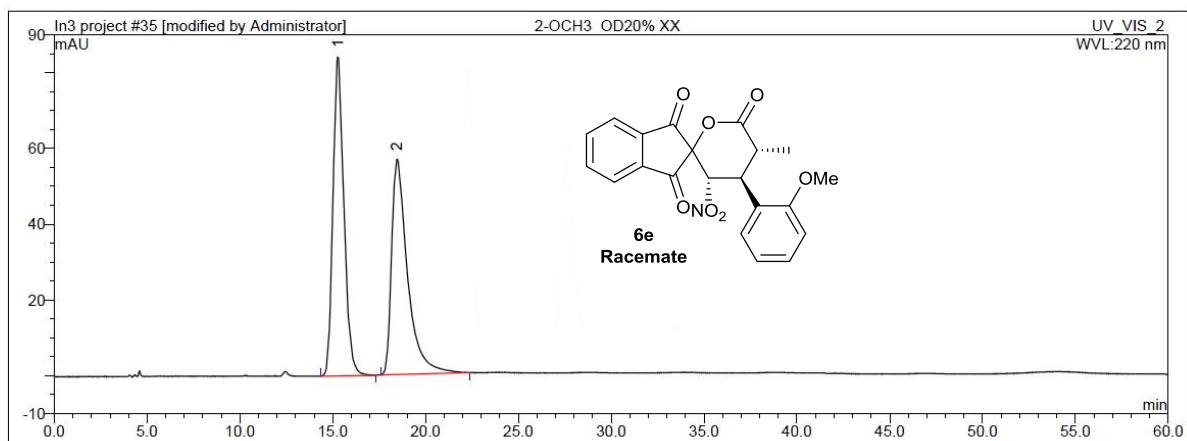

### Peak Analysis Report

| No. | Peak Name | Ret. Time (detected)<br>min | Area<br>mAU*min | Rel. Area<br>% | Height<br>mAU | Amount |
|-----|-----------|-----------------------------|-----------------|----------------|---------------|--------|
| 1   | n.a.      | 15.64                       | 1.939           | 0.48           | 2.615         | n.a.   |
| 2   | n.a.      | 17.68                       | 400.824         | 99.52          | 578.678       | n.a.   |

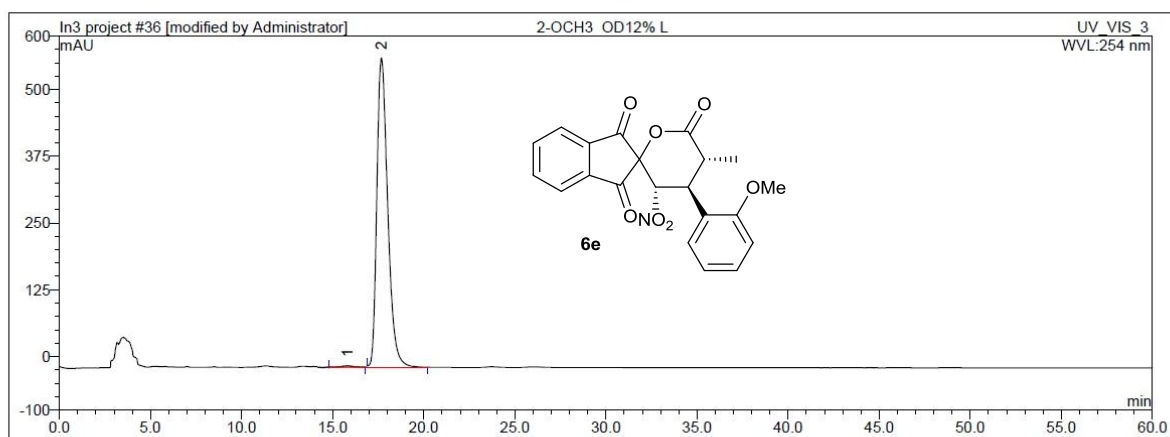

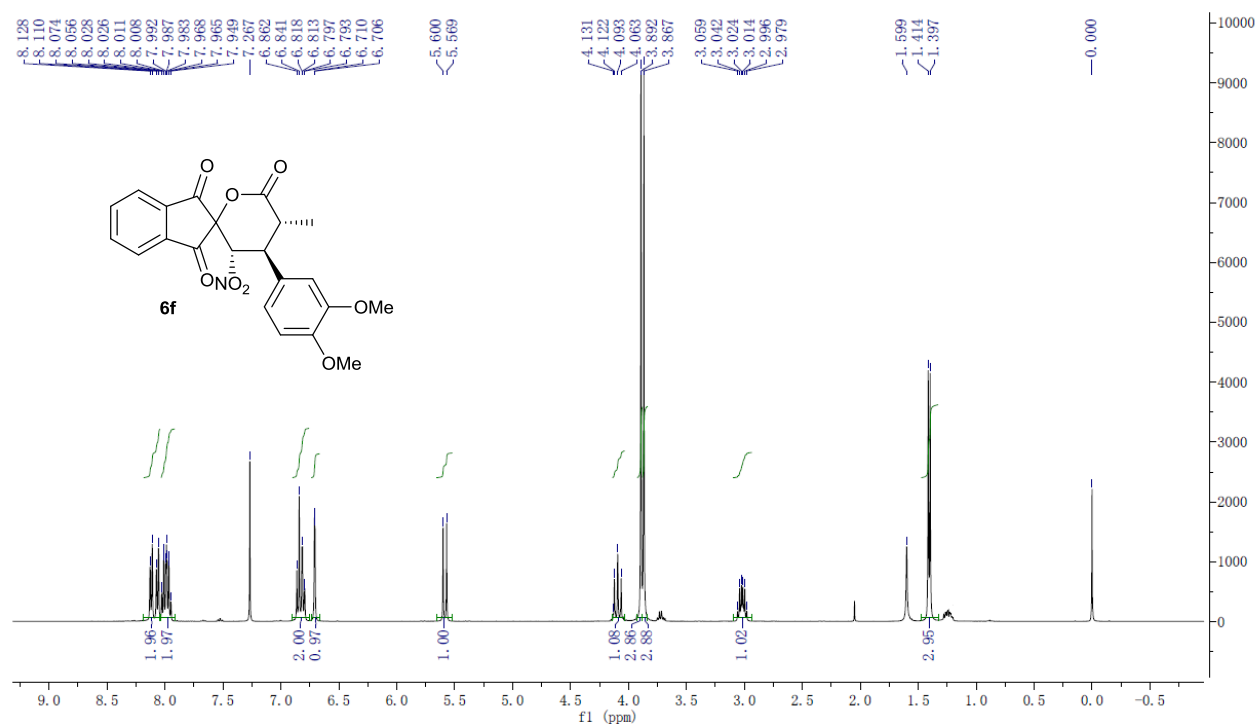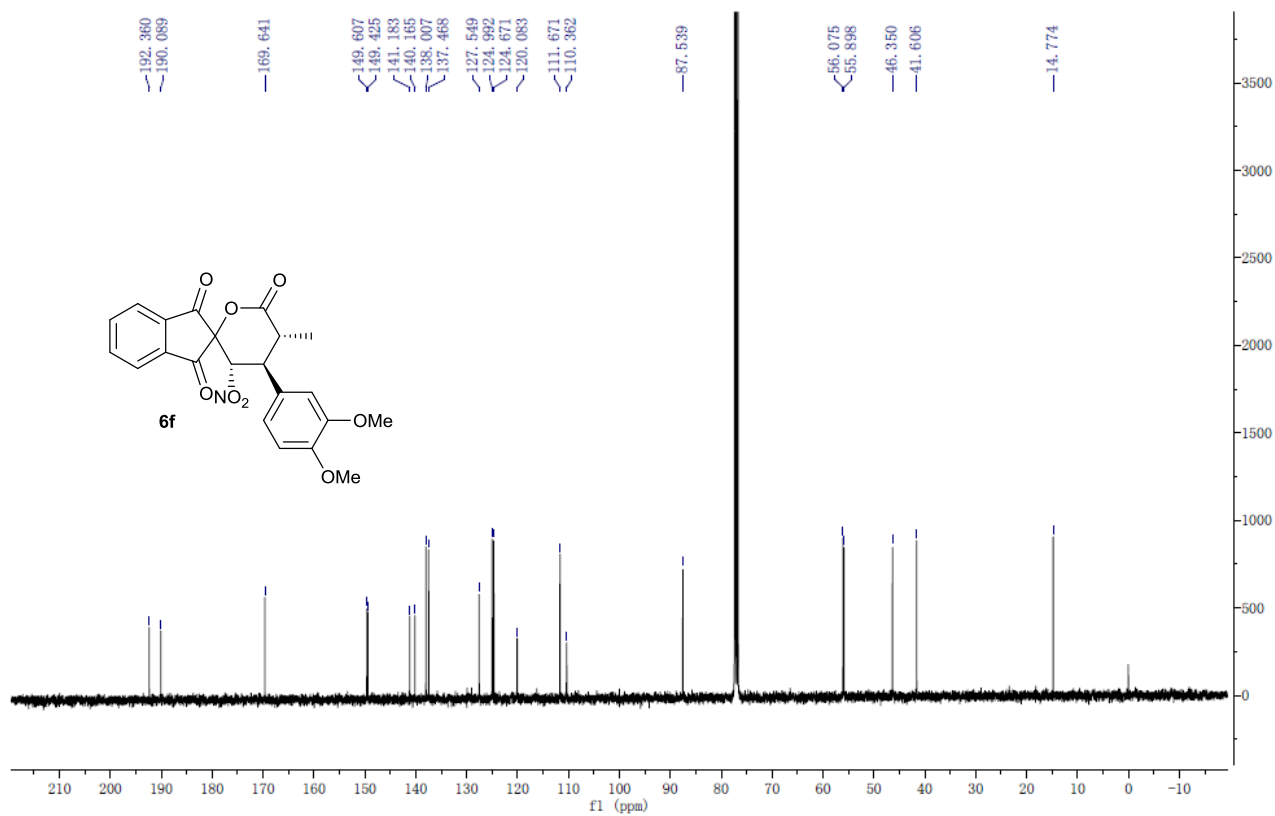



### Peak Analysis Report

| No. | Peak Name | Ret. Time (detected) | Area    | Rel. Area | Height  | Amount |
|-----|-----------|----------------------|---------|-----------|---------|--------|
|     |           | min                  | mAU*min | %         | mAU     |        |
| 1   | n.a.      | 26.31                | 295.694 | 50.12     | 206.502 | n.a.   |
| 2   | n.a.      | 36.88                | 294.240 | 49.88     | 147.219 | n.a.   |

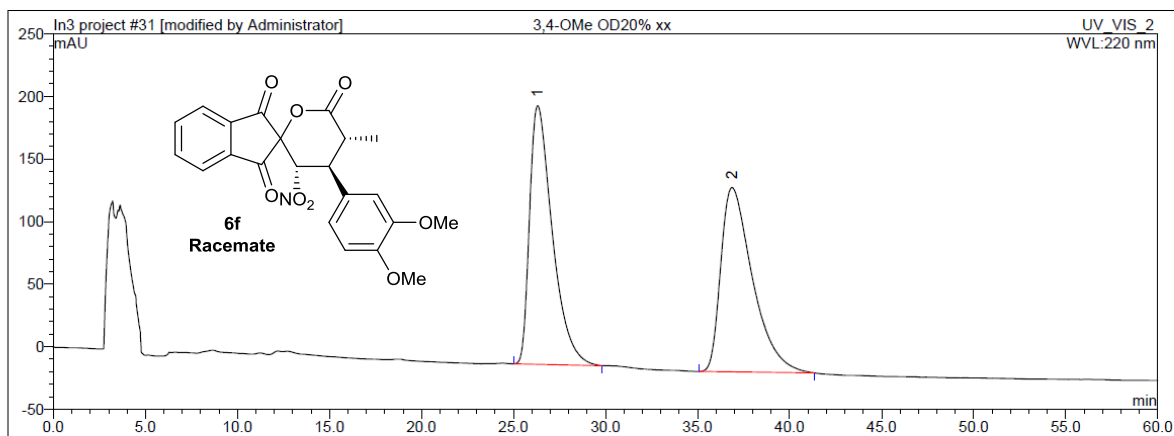

### Peak Analysis Report

| No. | Peak Name | Ret. Time (detected) | Area     | Rel. Area | Height  | Amount |
|-----|-----------|----------------------|----------|-----------|---------|--------|
|     |           | min                  | mAU*min  | %         | mAU     |        |
| 1   | n.a.      | 27.63                | 28.594   | 1.70      | 23.184  | n.a.   |
| 2   | n.a.      | 36.53                | 1655.628 | 98.30     | 856.754 | n.a.   |

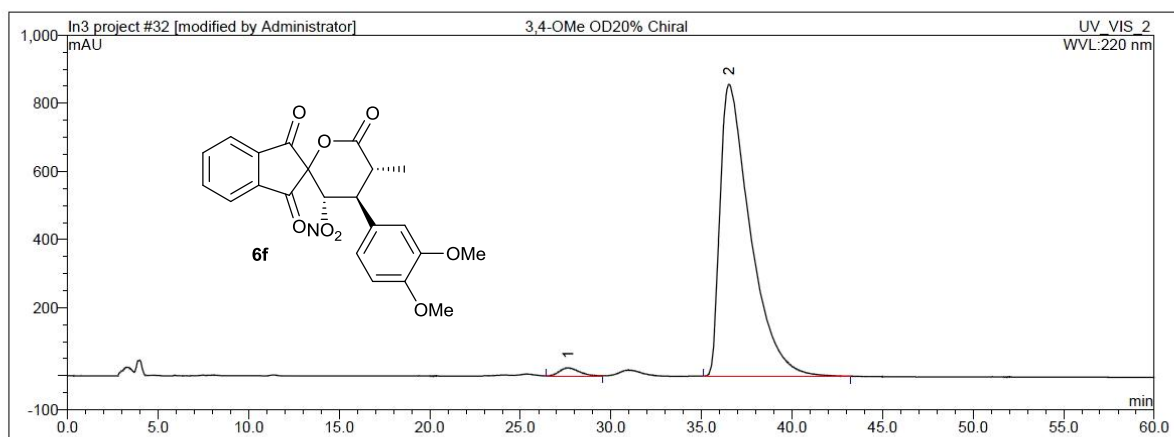

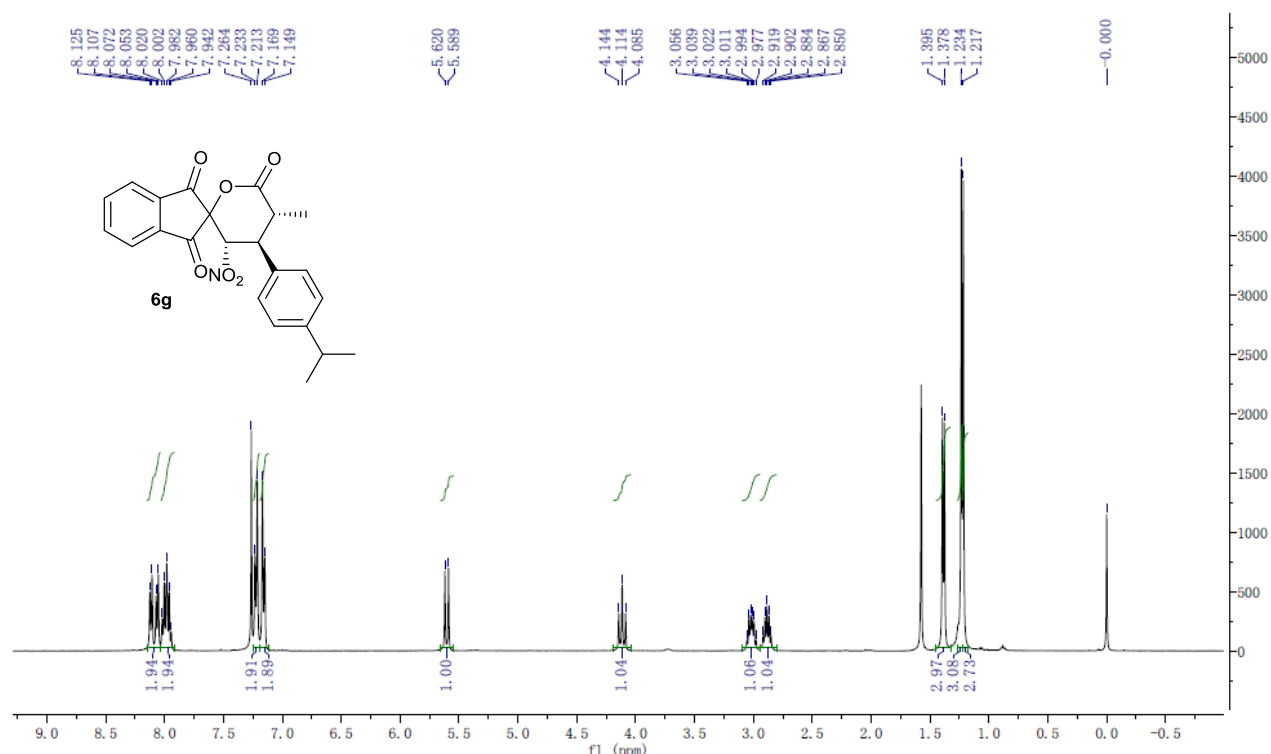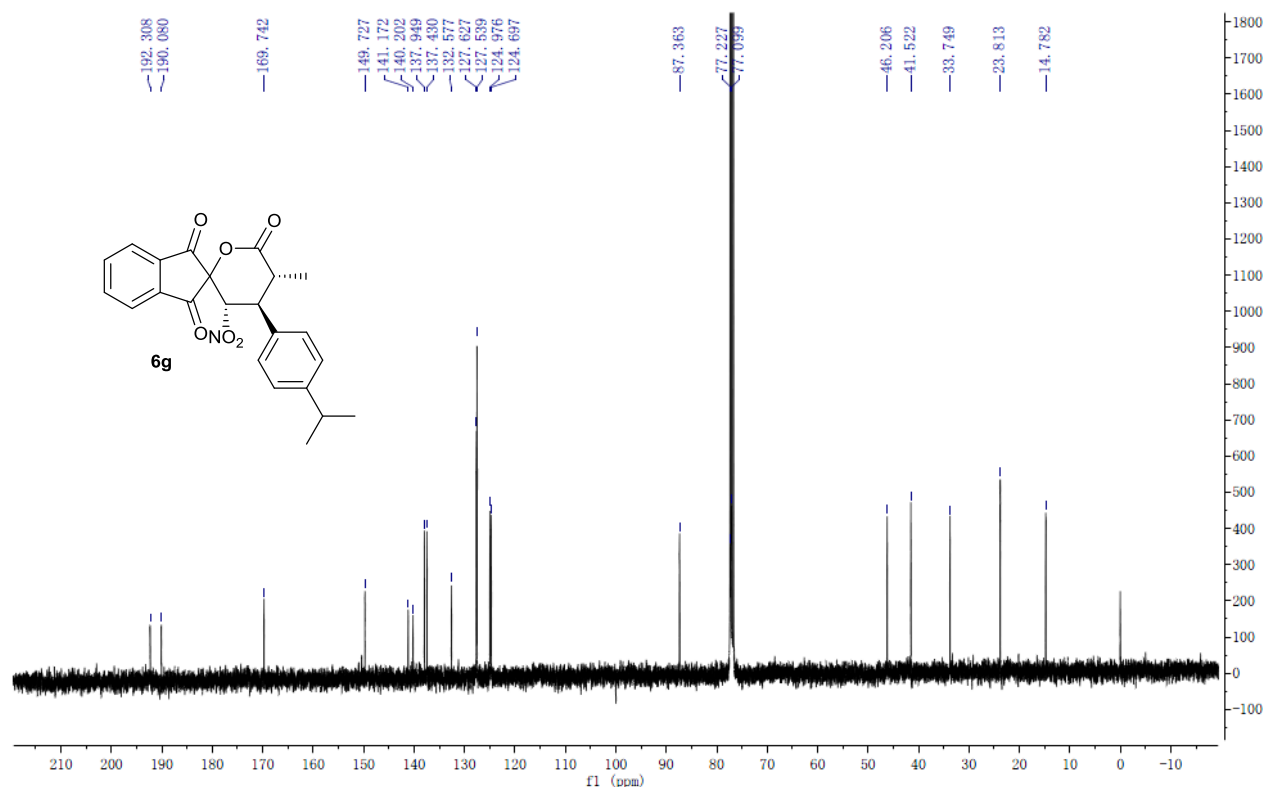

### Peak Analysis Report

| No. | Peak Name | Ret Time (detected) | Area    | Rel Area | Height  | Amount |
|-----|-----------|---------------------|---------|----------|---------|--------|
|     |           | min                 | mAU*min | %        | mAU     |        |
| 1   | n.a.      | 16.38               | 342.639 | 49.63    | 517.674 | n.a.   |
| 2   | n.a.      | 18.02               | 347.684 | 50.37    | 438.691 | n.a.   |

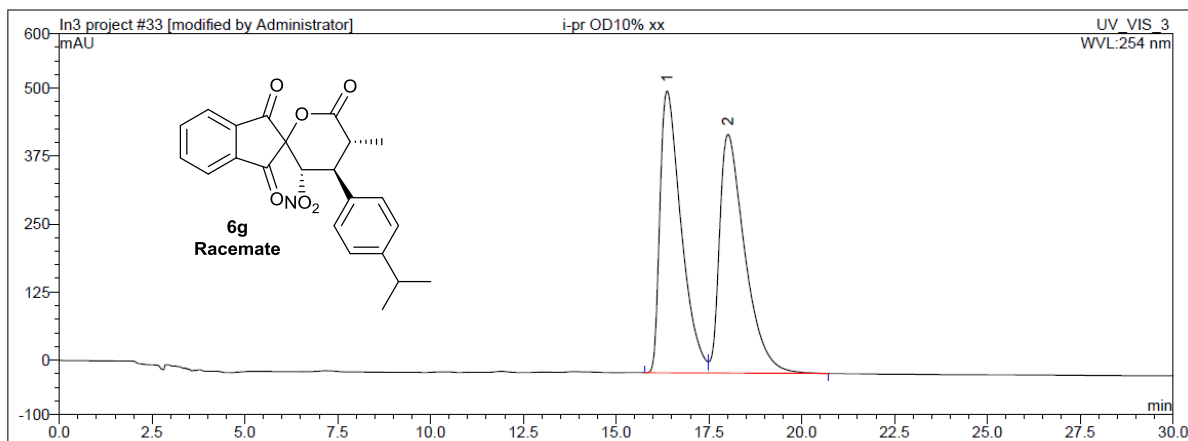

### Peak Analysis Report

| No. | Peak Name | Ret Time (detected) | Area    | Rel Area | Height  | Amount |
|-----|-----------|---------------------|---------|----------|---------|--------|
|     |           | min                 | mAU*min | %        | mAU     |        |
| 1   | n.a.      | 16.32               | 6.123   | 1.18     | 15.217  | n.a.   |
| 2   | n.a.      | 18.03               | 512.026 | 98.82    | 602.632 | n.a.   |

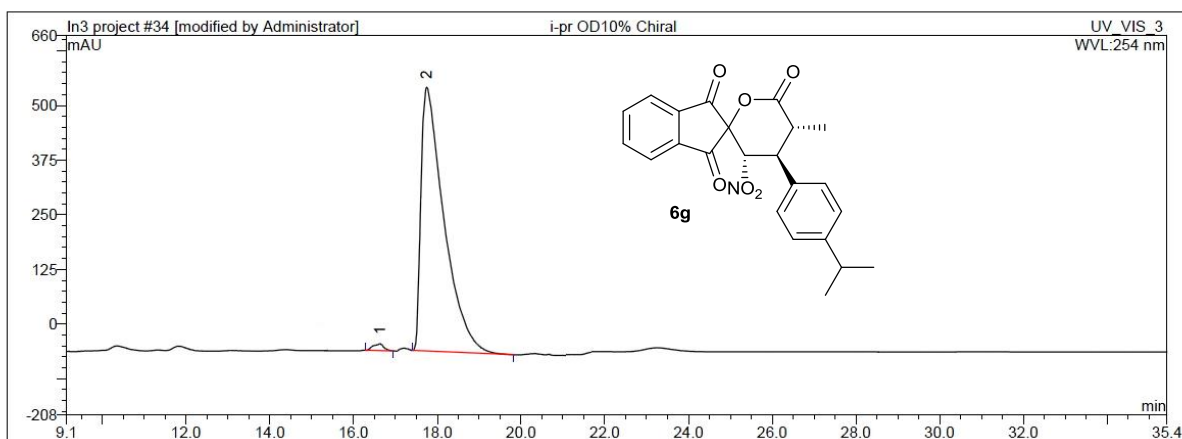

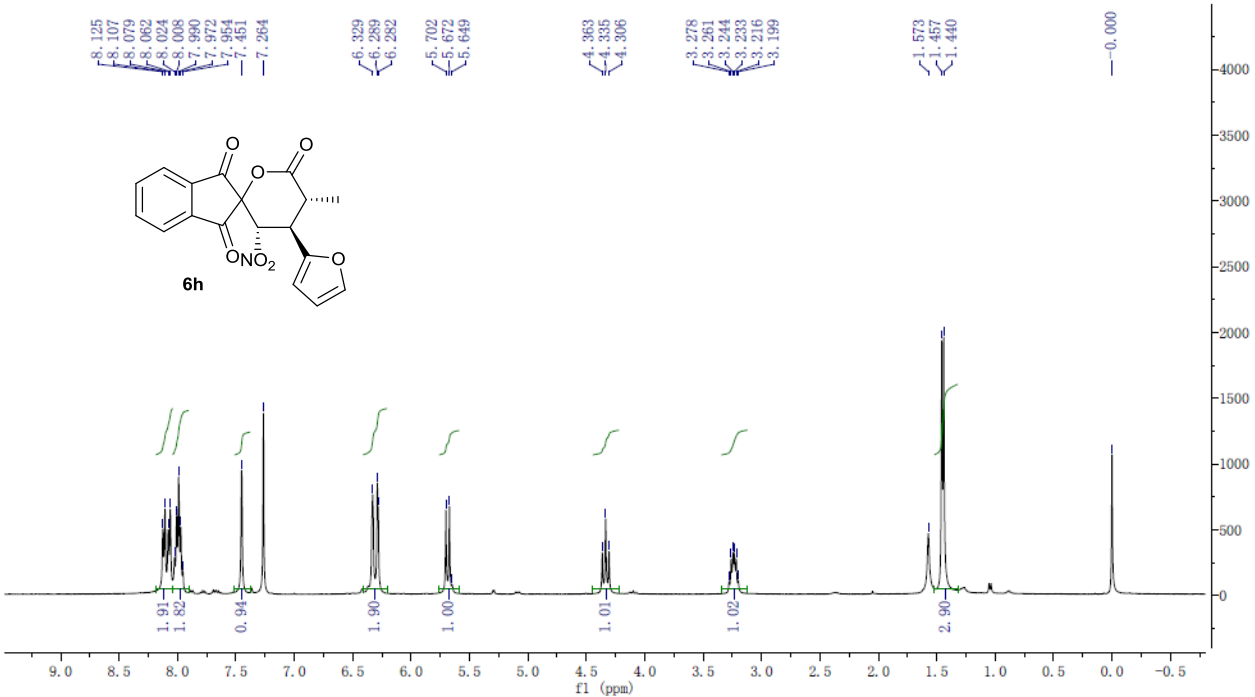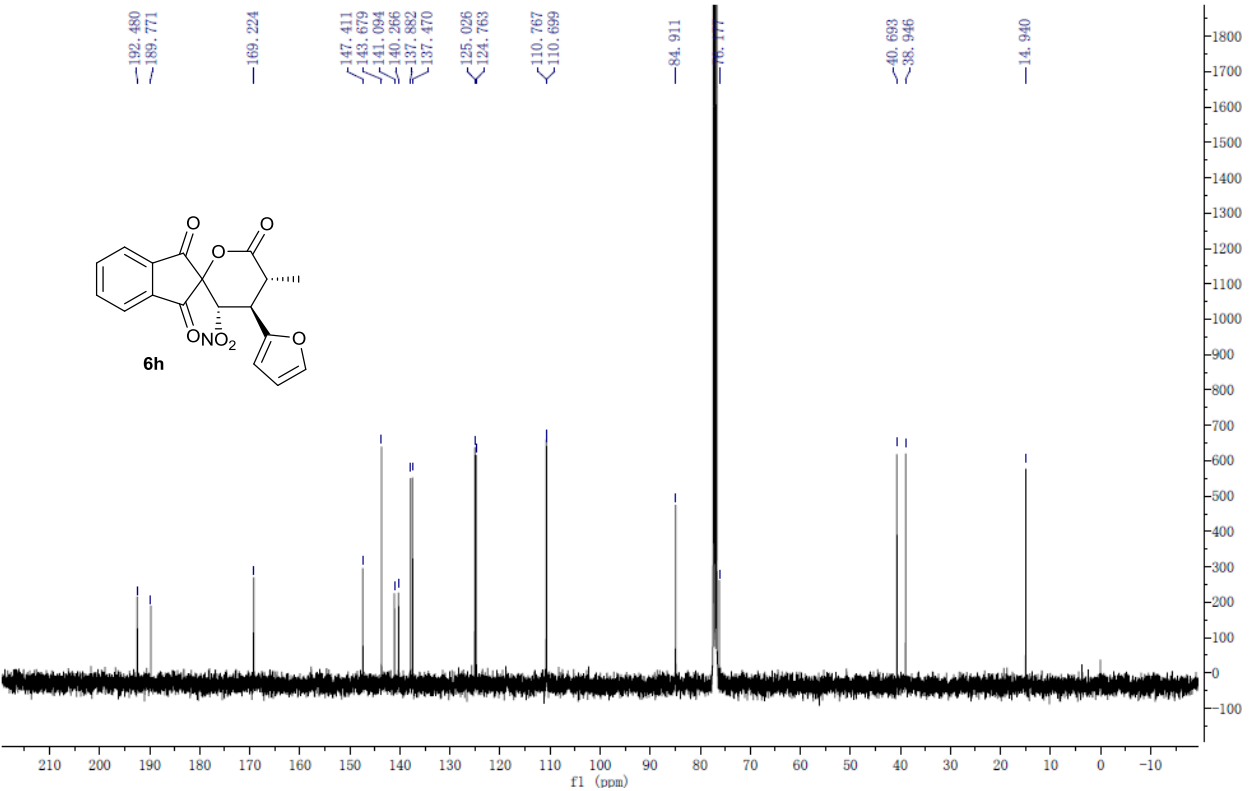

### Peak Analysis Report

| No. | Peak Name | Ret. Time (detected) | Area    | Rel. Area | Height  | Amount |
|-----|-----------|----------------------|---------|-----------|---------|--------|
|     |           | min                  | mAU*min | %         | mAU     |        |
| 1   | n.a.      | 8.79                 | 77.142  | 50.91     | 231.274 | n.a.   |
| 2   | n.a.      | 18.03                | 74.372  | 49.09     | 97.405  | n.a.   |

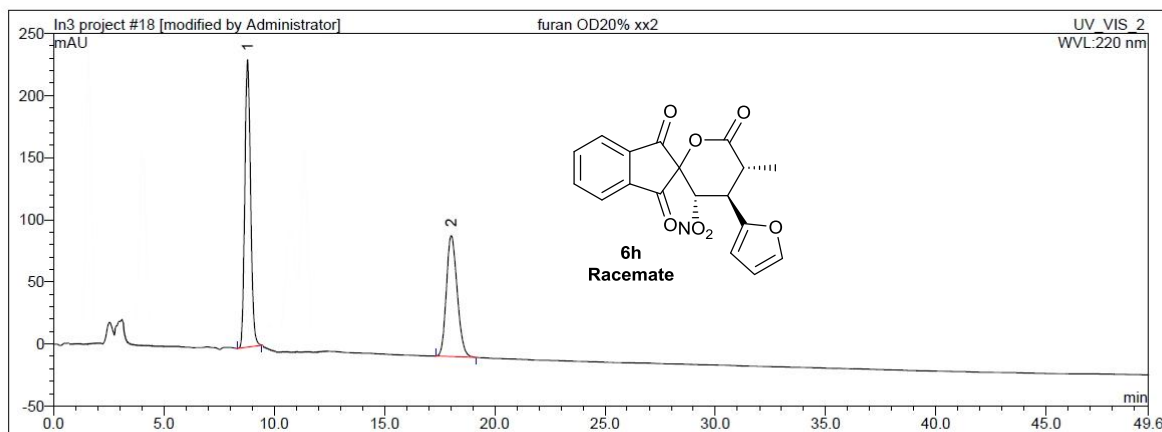

### Peak Analysis Report

| No. | Peak Name | Ret. Time (detected) | Area    | Rel. Area | Height | Amount |
|-----|-----------|----------------------|---------|-----------|--------|--------|
|     |           | min                  | mAU*min | %         | mAU    |        |
| 1   | n.a.      | 8.85                 | 11.711  | 97.50     | 42.418 | n.a.   |
| 2   | n.a.      | 18.05                | 0.301   | 2.50      | 0.716  | n.a.   |

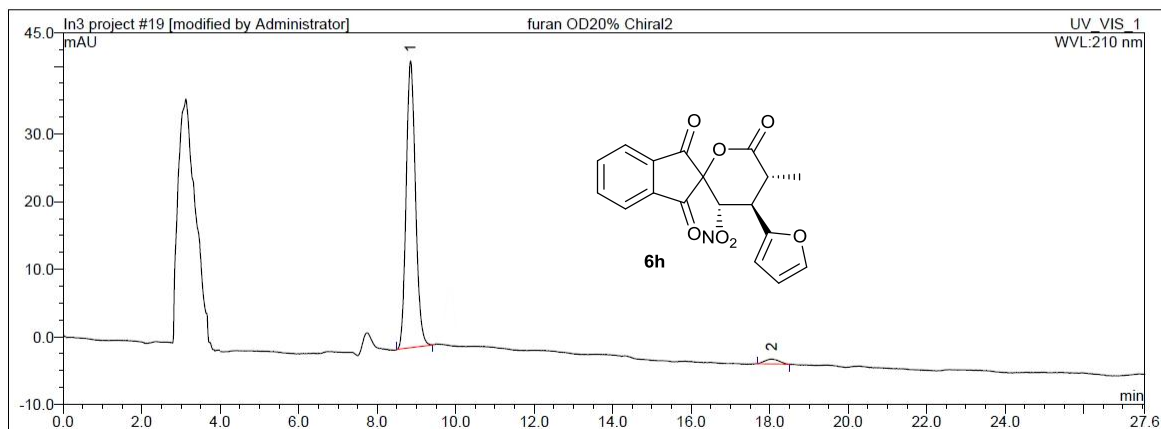

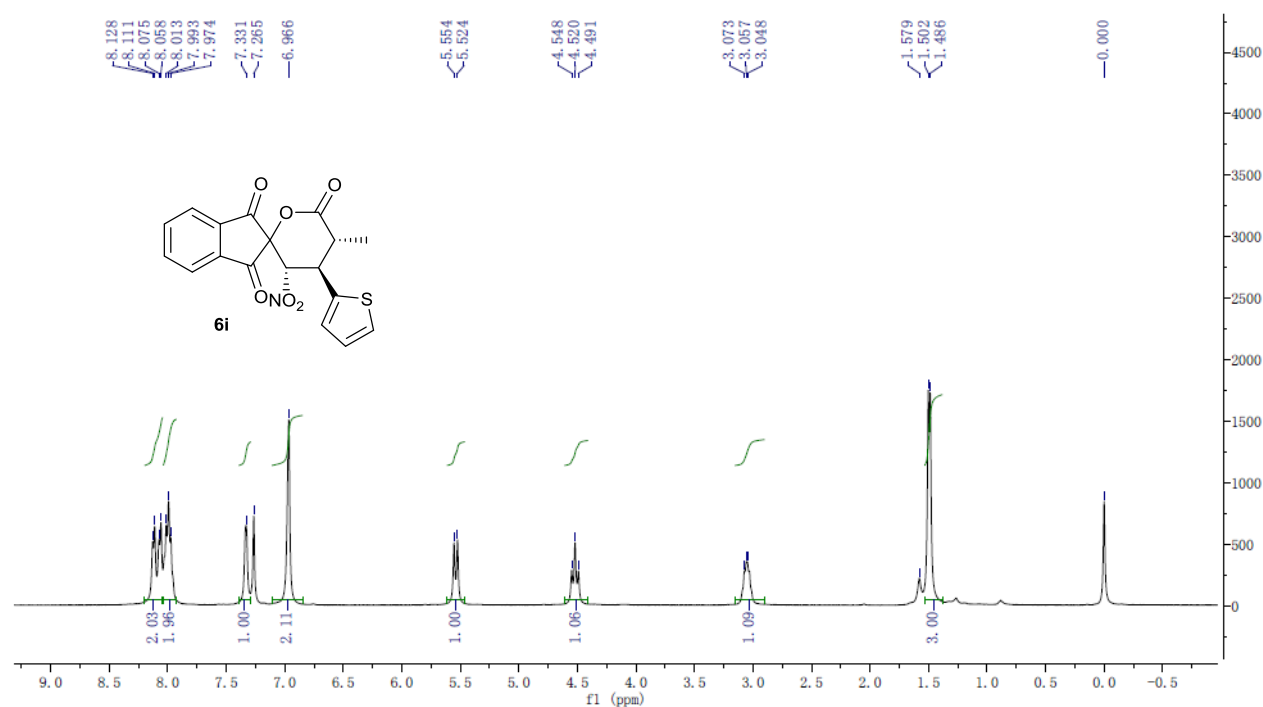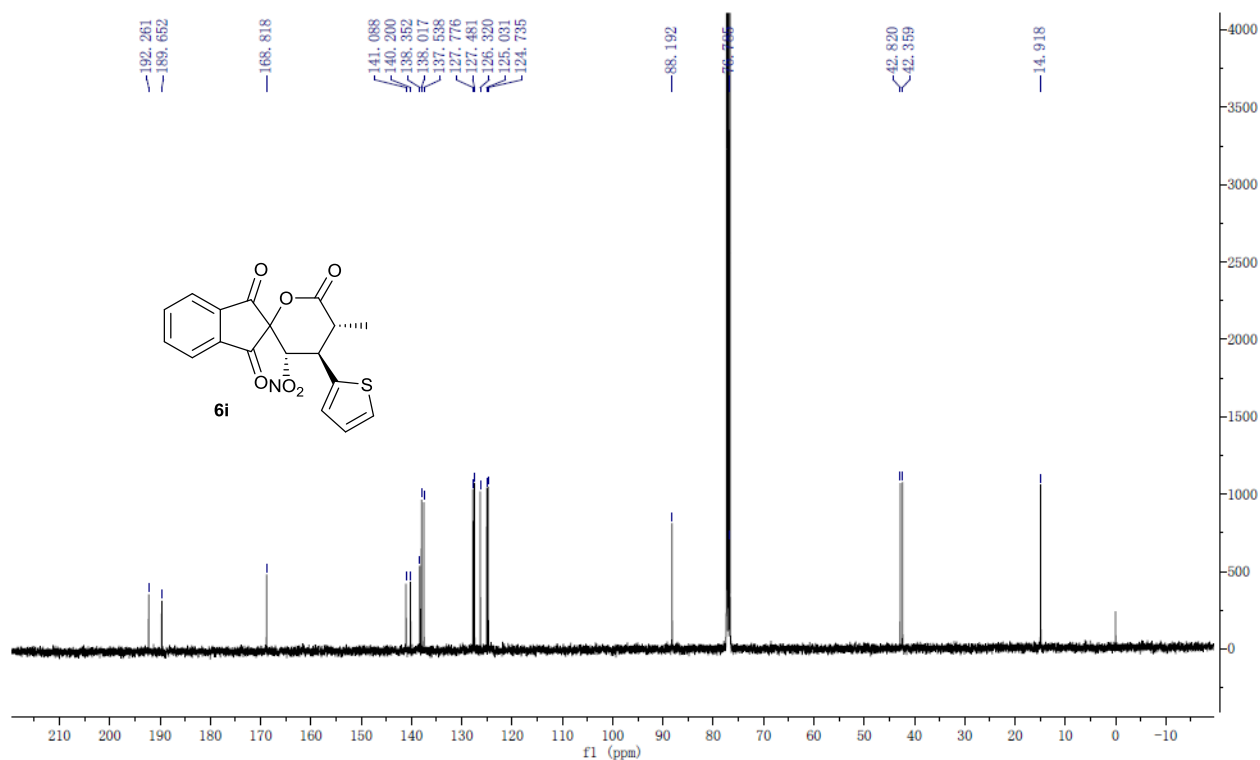



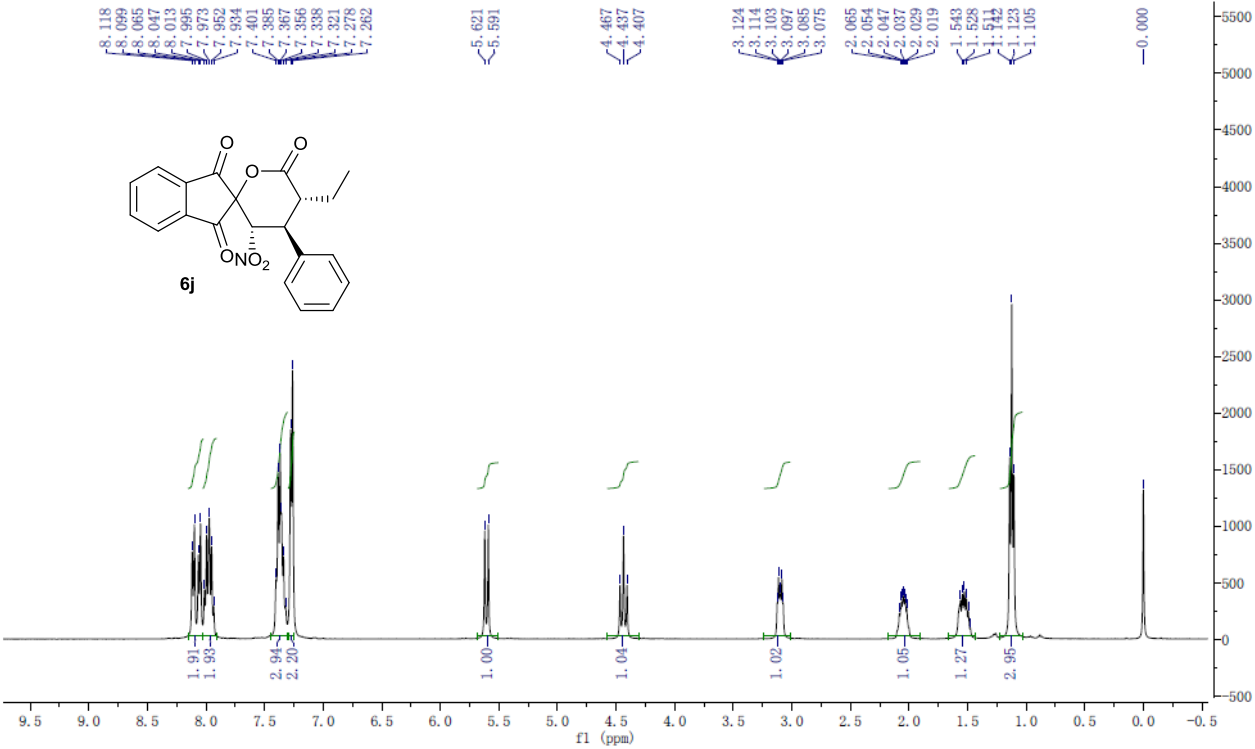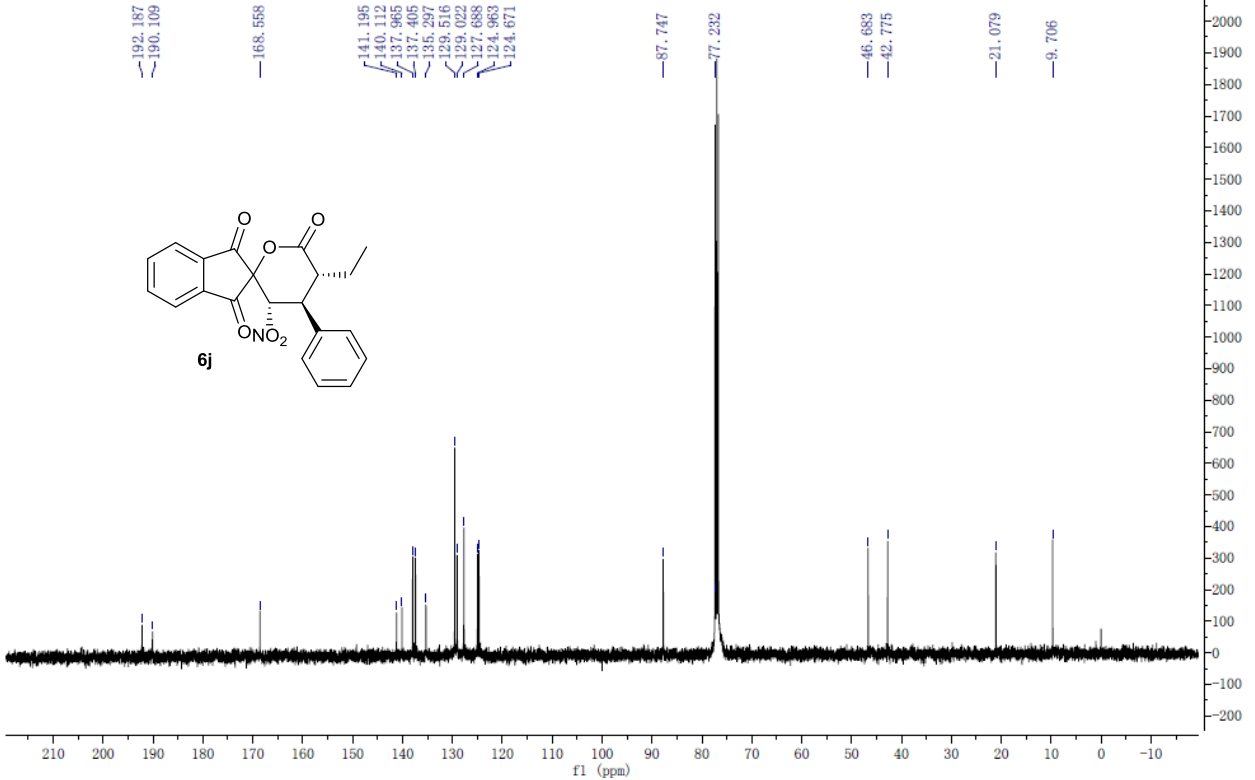



### Peak Analysis Report

| No. | Peak Name | Ret. Time (detected)<br>min | Area<br>mAU*min | Rel. Area<br>% | Height<br>mAU | Amount |
|-----|-----------|-----------------------------|-----------------|----------------|---------------|--------|
| 1   | n.a.      | 8.17                        | 1380.660        | 51.10          | 1407.284      | n.a.   |
| 2   | n.a.      | 13.42                       | 1321.286        | 48.90          | 1359.002      | n.a.   |

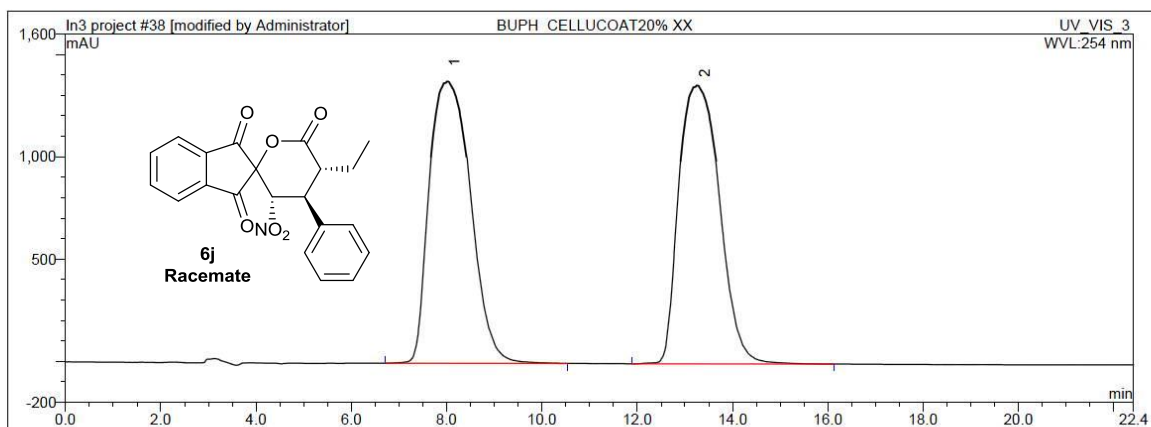

### Peak Analysis Report

| No. | Peak Name | Ret. Time (detected)<br>min | Area<br>mAU*min | Rel. Area<br>% | Height<br>mAU | Amount |
|-----|-----------|-----------------------------|-----------------|----------------|---------------|--------|
| 1   | n.a.      | 8.15                        | 10.085          | 0.69           | 55.658        | n.a.   |
| 2   | n.a.      | 13.39                       | 1462.010        | 99.31          | 2176.358      | n.a.   |

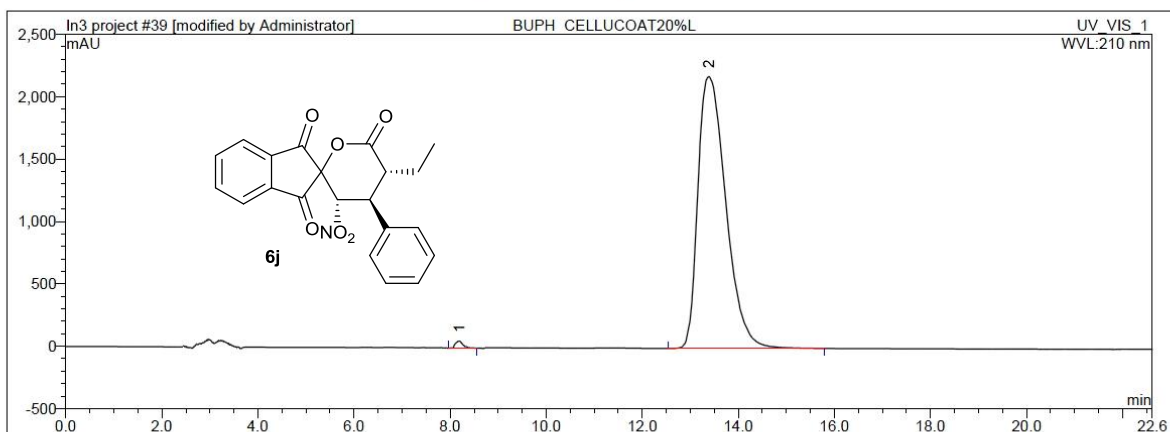

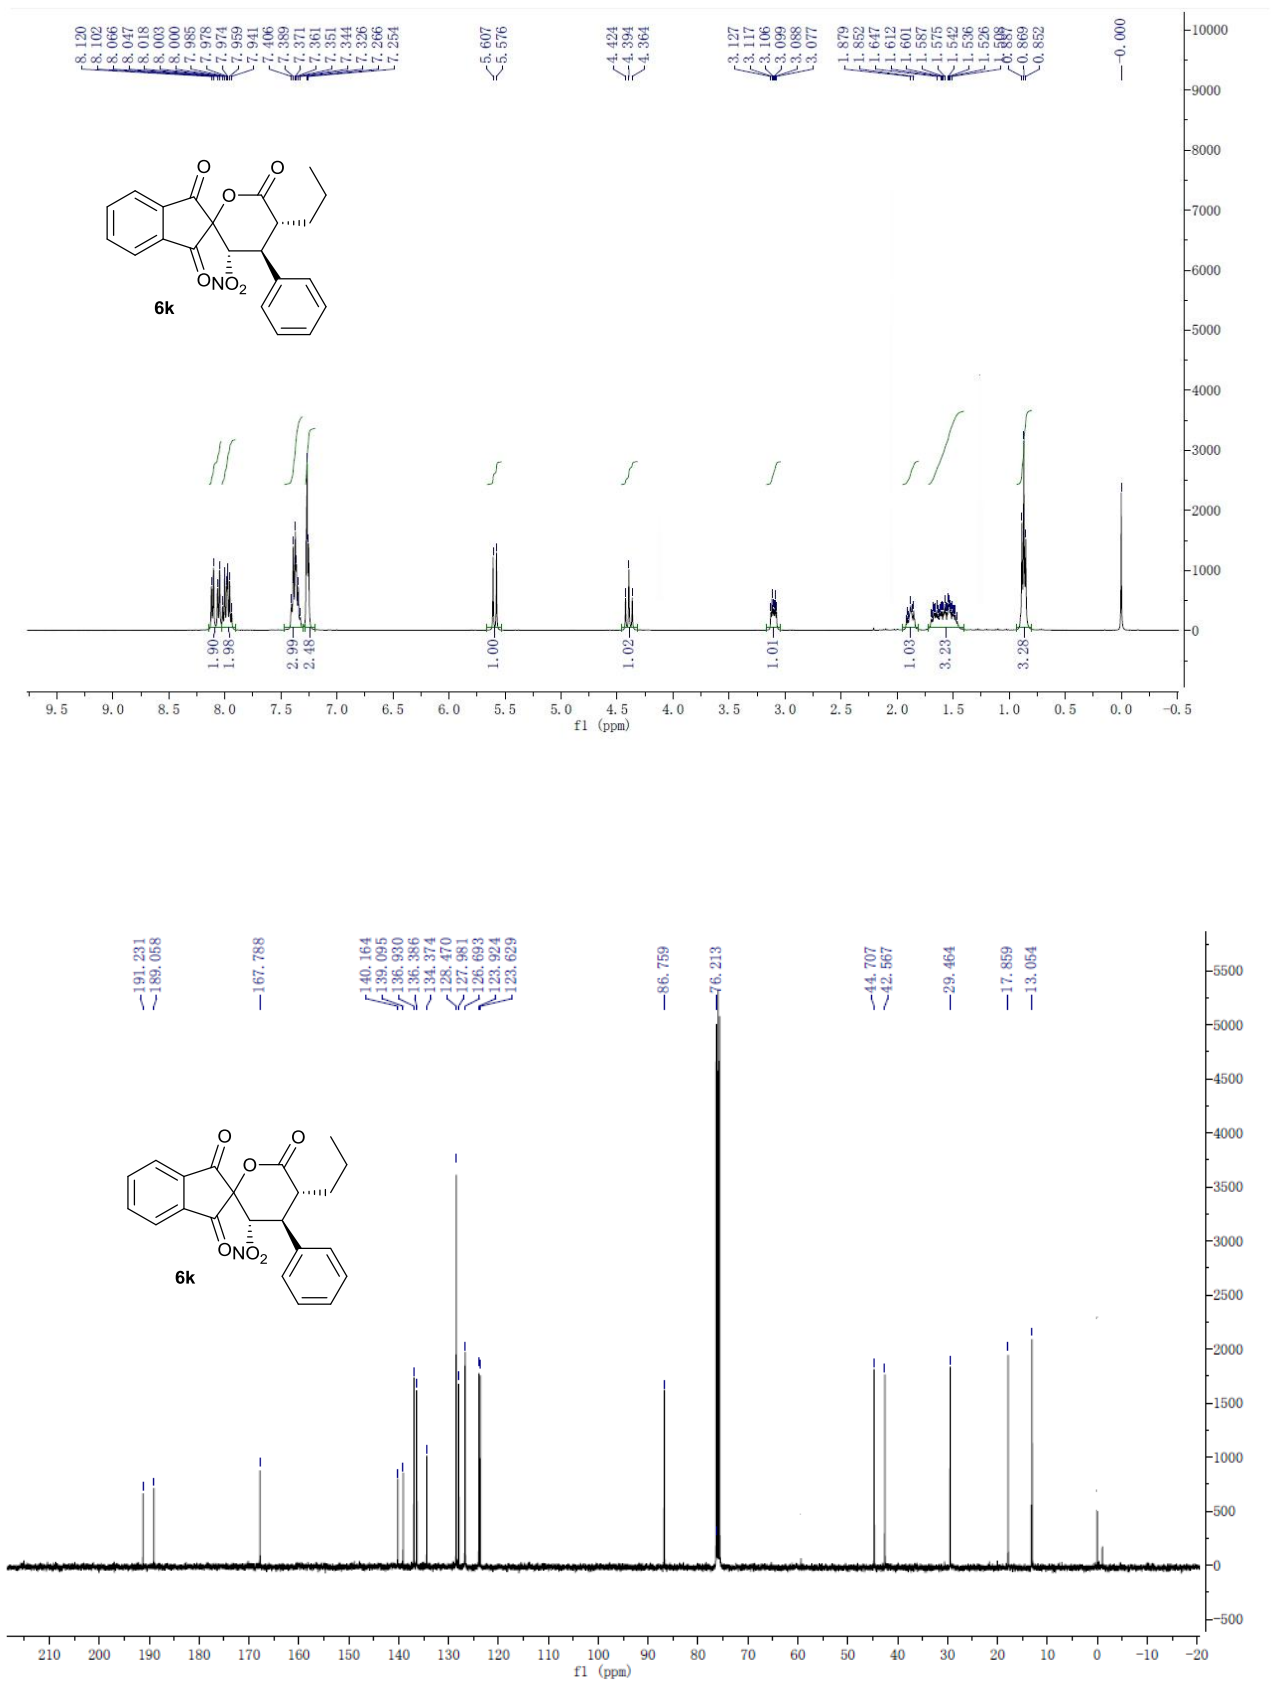

### Peak Analysis Report

| No. | Peak Name | Ret.Time (detected) | Area    | Rel.Area | Height | Amount |
|-----|-----------|---------------------|---------|----------|--------|--------|
|     |           | min                 | mAU*min | %        | mAU    |        |
| 1   | n.a.      | 11.17               | 18.054  | 49.04    | 33.008 | n.a.   |
| 2   | n.a.      | 12.92               | 18.759  | 50.96    | 29.807 | n.a.   |

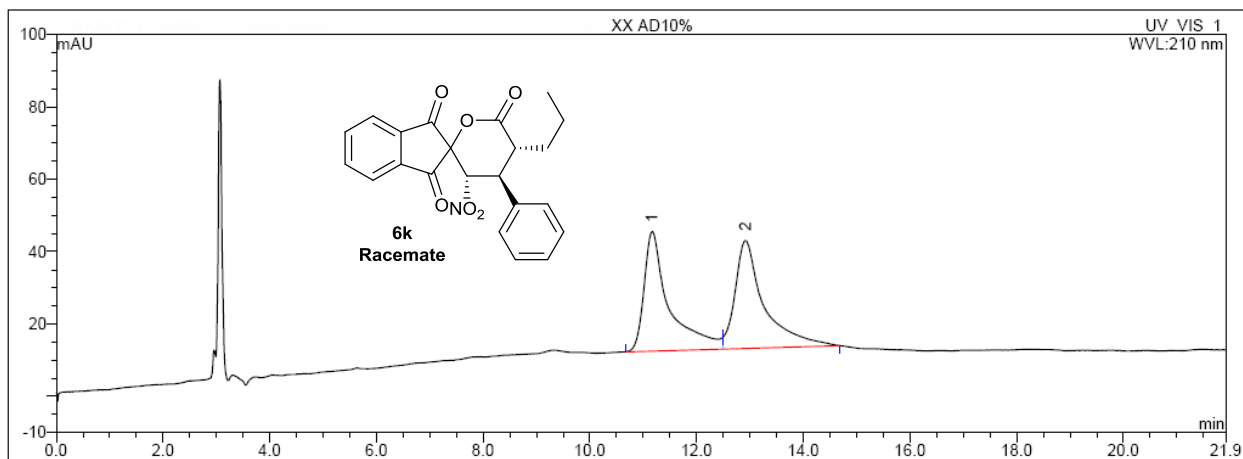

### Peak Analysis Report

| No. | Peak Name | Ret.Time (detected) | Area    | Rel.Area | Height  | Amount |
|-----|-----------|---------------------|---------|----------|---------|--------|
|     |           | min                 | mAU*min | %        | mAU     |        |
| 1   | n.a.      | 11.22               | 76.891  | 99.37    | 124.374 | n.a.   |
| 2   | n.a.      | 12.98               | 0.485   | 0.63     | 1.403   | n.a.   |

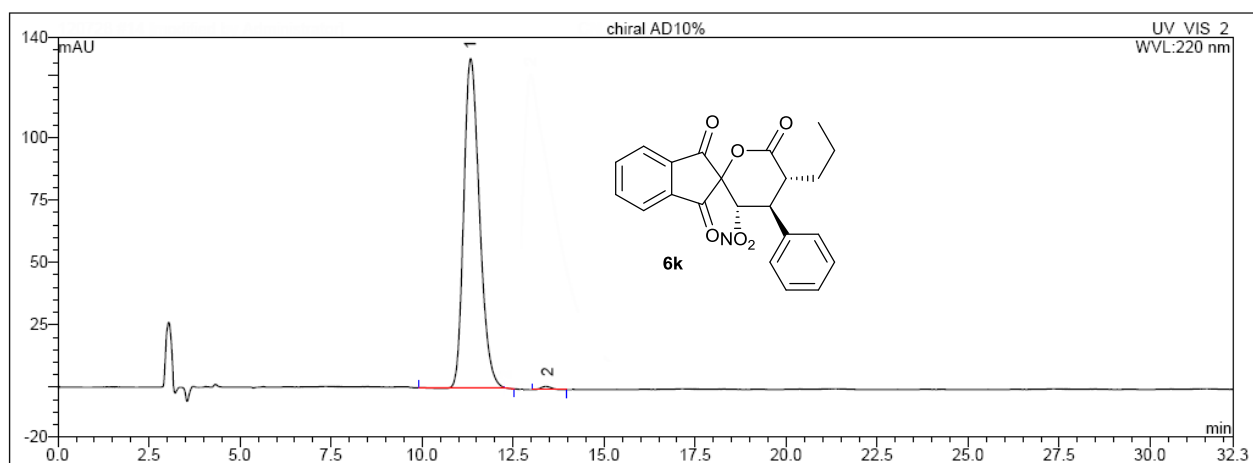

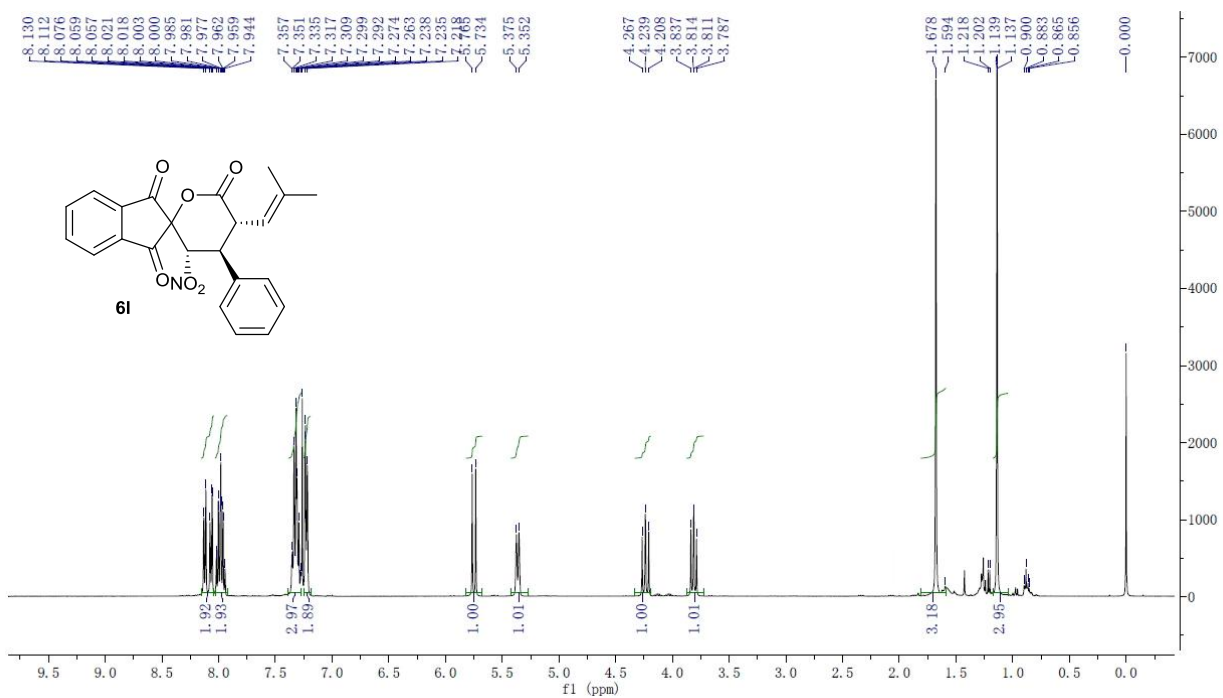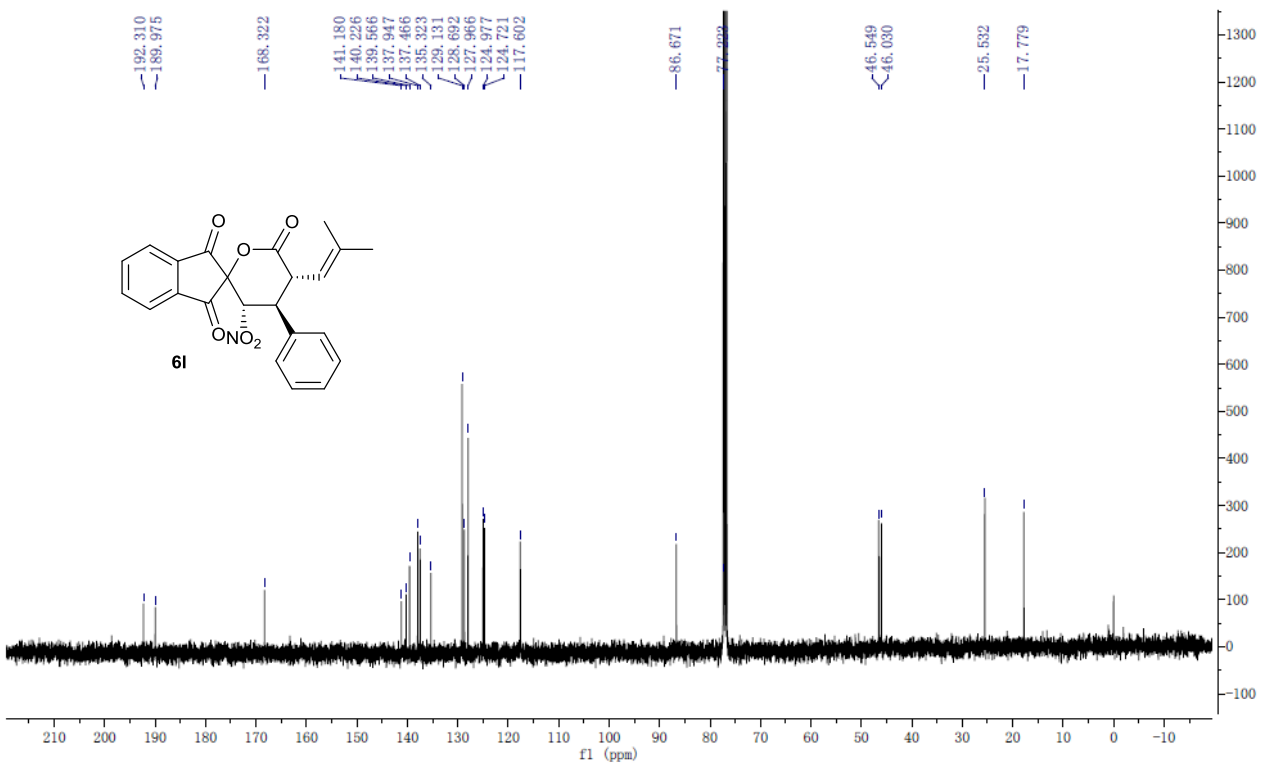

### Peak Analysis Report

| No. | Peak Name | Ret. Time (detected) | Area    | Rel. Area | Height | Amount |
|-----|-----------|----------------------|---------|-----------|--------|--------|
|     |           | min                  | mAU*min | %         | mAU    |        |
| 1   | n.a.      | 14.78                | 16.762  | 49.06     | 30.809 | n.a.   |
| 2   | n.a.      | 15.95                | 17.403  | 50.94     | 28.831 | n.a.   |

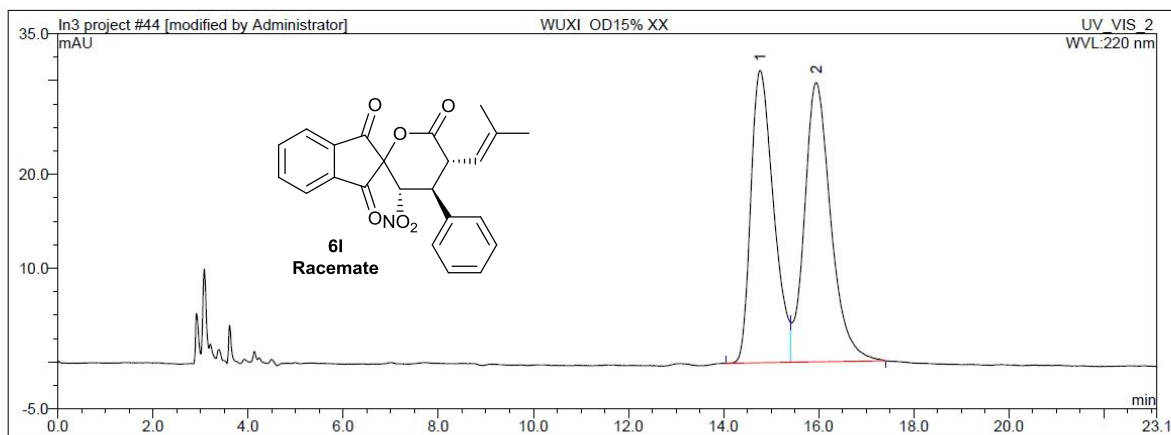

### Peak Analysis Report

| No. | Peak Name | Ret. Time (detected) | Area    | Rel. Area | Height  | Amount |
|-----|-----------|----------------------|---------|-----------|---------|--------|
|     |           | min                  | mAU*min | %         | mAU     |        |
| 1   | n.a.      | 14.76                | 0.570   | 0.70      | 1.620   | n.a.   |
| 2   | n.a.      | 15.86                | 81.387  | 99.30     | 136.373 | n.a.   |

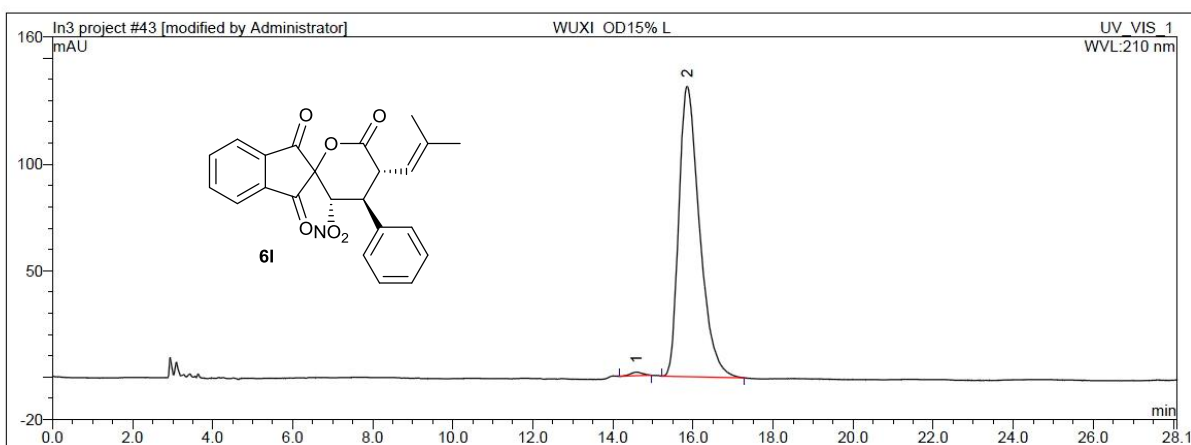

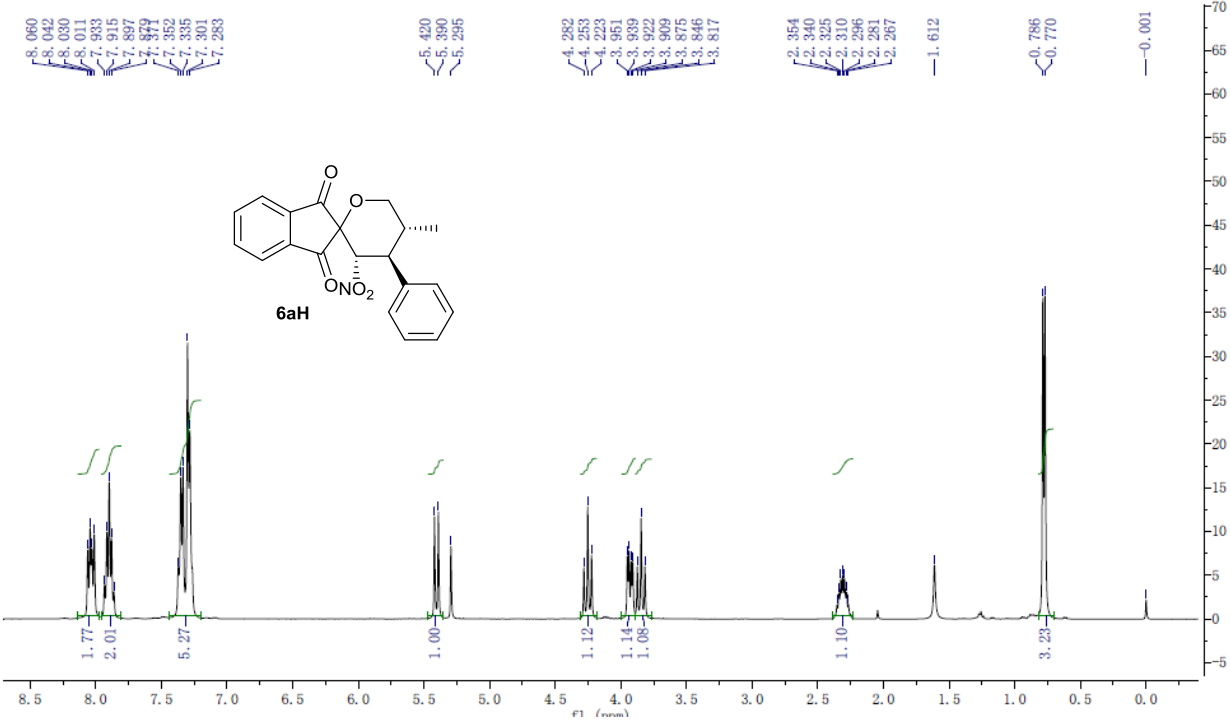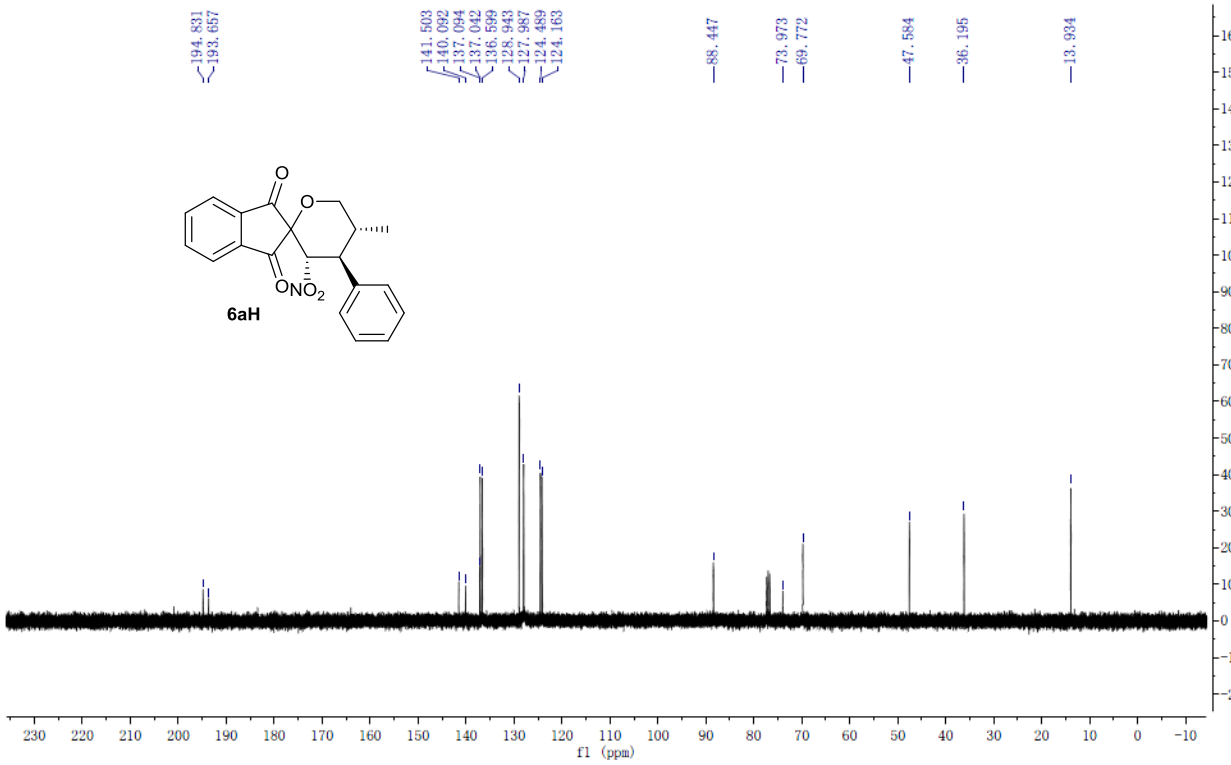

### Peak Analysis Report

| No. | Peak Name | Ret. Time (detected)<br>min | Area<br>mAU*min | Rel. Area<br>% | Height<br>mAU | Amount |
|-----|-----------|-----------------------------|-----------------|----------------|---------------|--------|
| 1   | n.a.      | 12.68                       | 92.147          | 50.87          | 275.469       | n.a.   |
| 2   | n.a.      | 22.87                       | 89.002          | 49.13          | 151.869       | n.a.   |

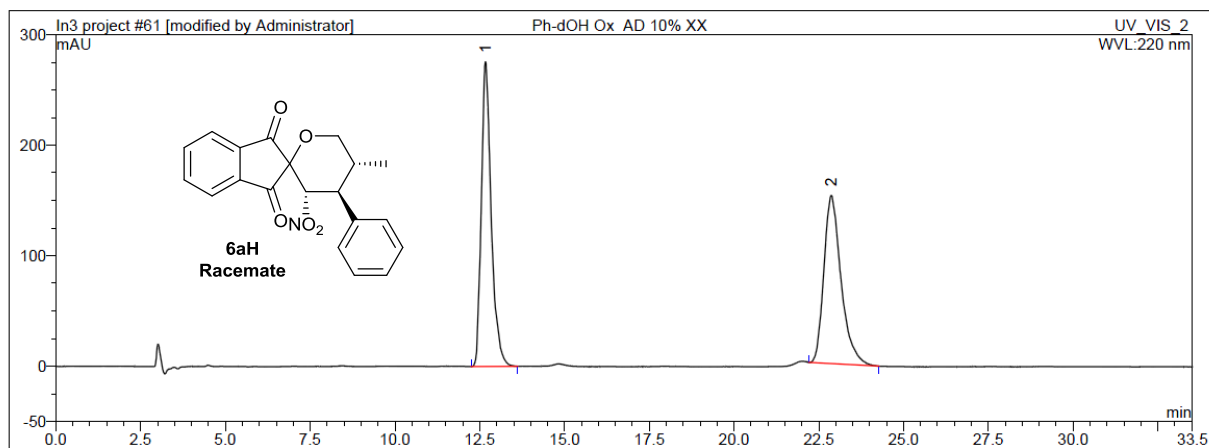

### Peak Analysis Report

| No. | Peak Name | Ret. Time (detected)<br>min | Area<br>mAU*min | Rel. Area<br>% | Height<br>mAU | Amount |
|-----|-----------|-----------------------------|-----------------|----------------|---------------|--------|
| 1   | n.a.      | 12.75                       | 326.697         | 98.55          | 938.310       | n.a.   |
| 2   | n.a.      | 23.03                       | 4.814           | 1.45           | 9.684         | n.a.   |

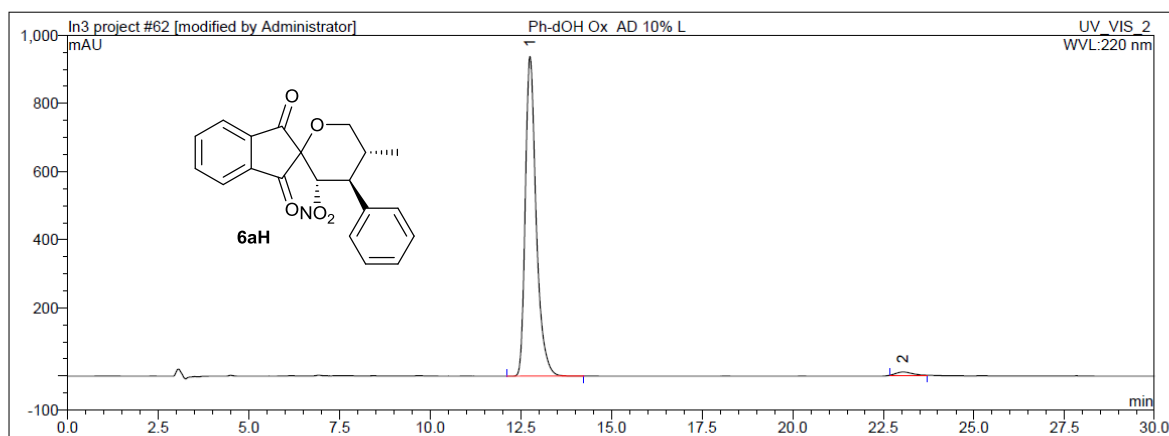

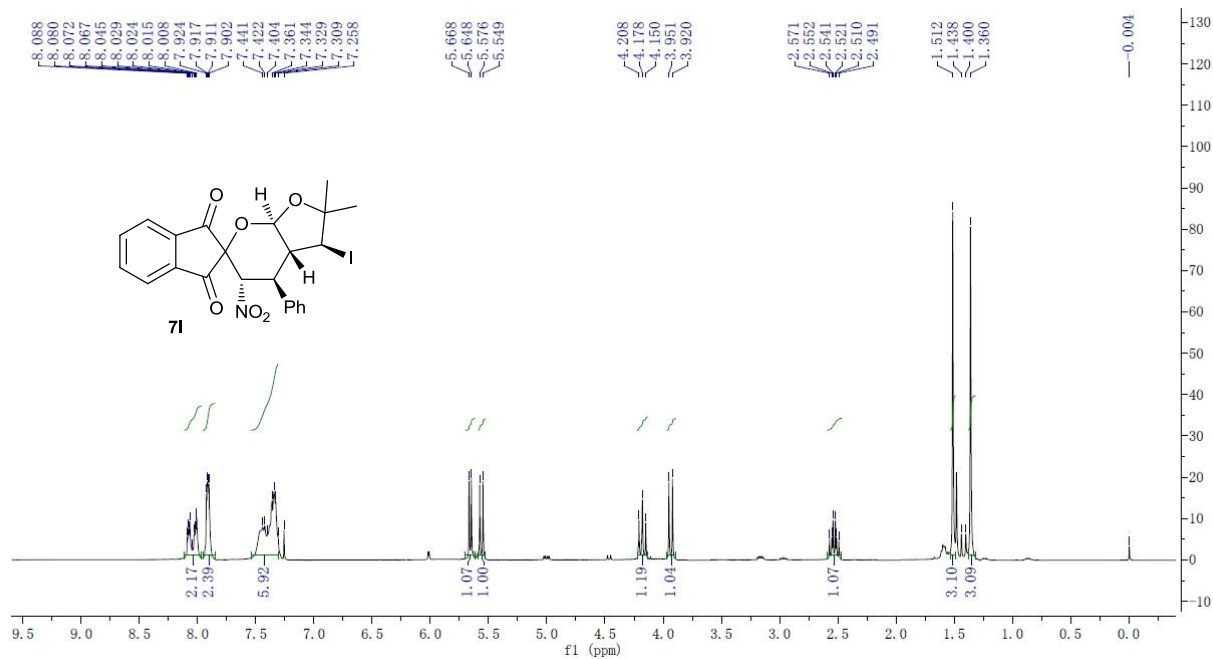

YL-0321-ph-CDCl<sub>3</sub>-C13-2013-3-30  
Pulse Sequence: s2pu1

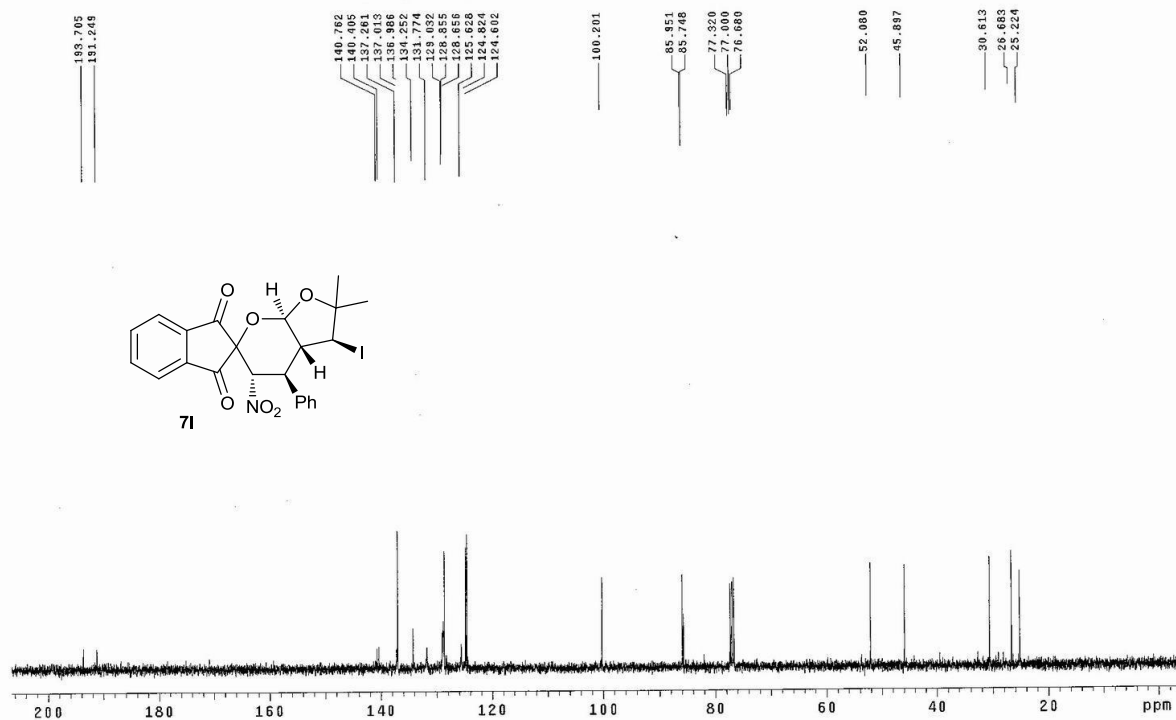



### Peak Analysis Report

| No. | Peak Name | Ret. Time (detected)<br>min | Area<br>mAU*min | Rel. Area<br>% | Height<br>mAU | Amount |
|-----|-----------|-----------------------------|-----------------|----------------|---------------|--------|
| 1   | n.a.      | 10.28                       | 34.496          | 45.46          | 105.150       | n.a.   |
| 2   | n.a.      | 11.62                       | 3.930           | 5.18           | 13.560        | n.a.   |
| 3   | n.a.      | 12.33                       | 33.259          | 43.83          | 87.219        | n.a.   |
| 4   | n.a.      | 14.03                       | 4.202           | 5.54           | 10.503        | n.a.   |

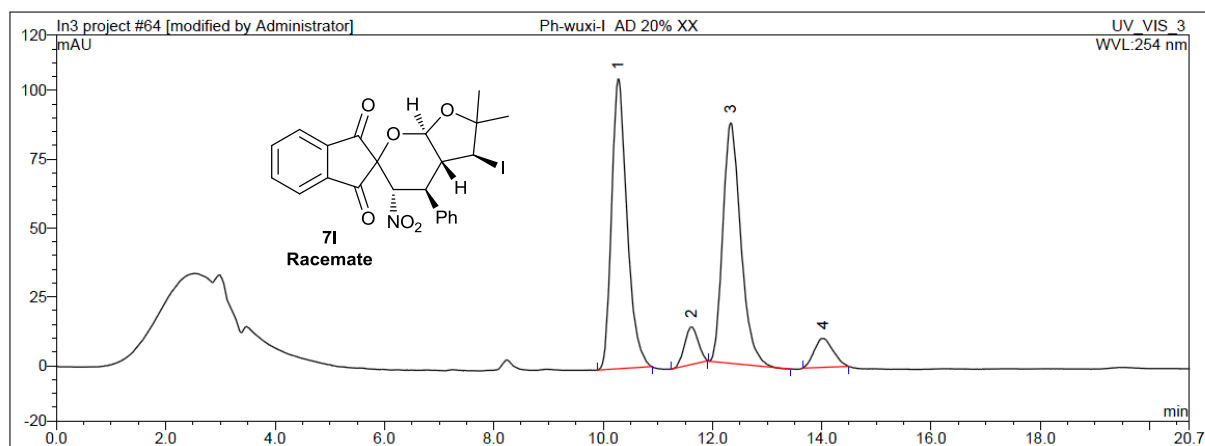

### Peak Analysis Report

| No. | Peak Name | Ret. Time (detected)<br>min | Area<br>mAU*min | Rel. Area<br>% | Height<br>mAU | Amount |
|-----|-----------|-----------------------------|-----------------|----------------|---------------|--------|
| 1   | n.a.      | 10.09                       | 99.440          | 98.59          | 299.955       | n.a.   |
| 2   | n.a.      | 12.14                       | 1.425           | 1.41           | 5.103         | n.a.   |

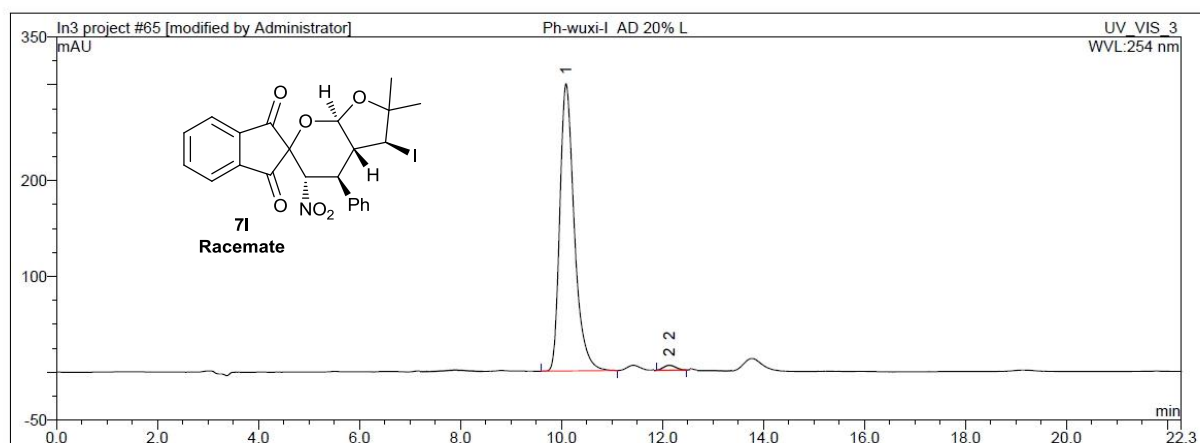

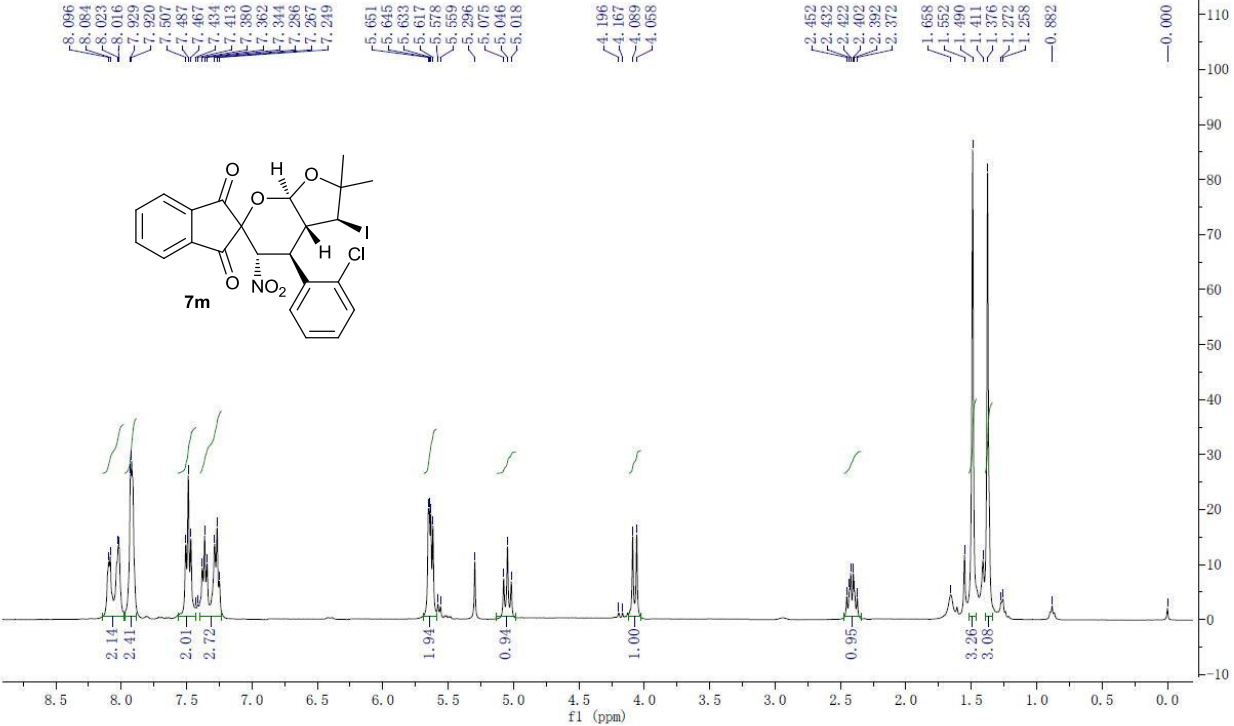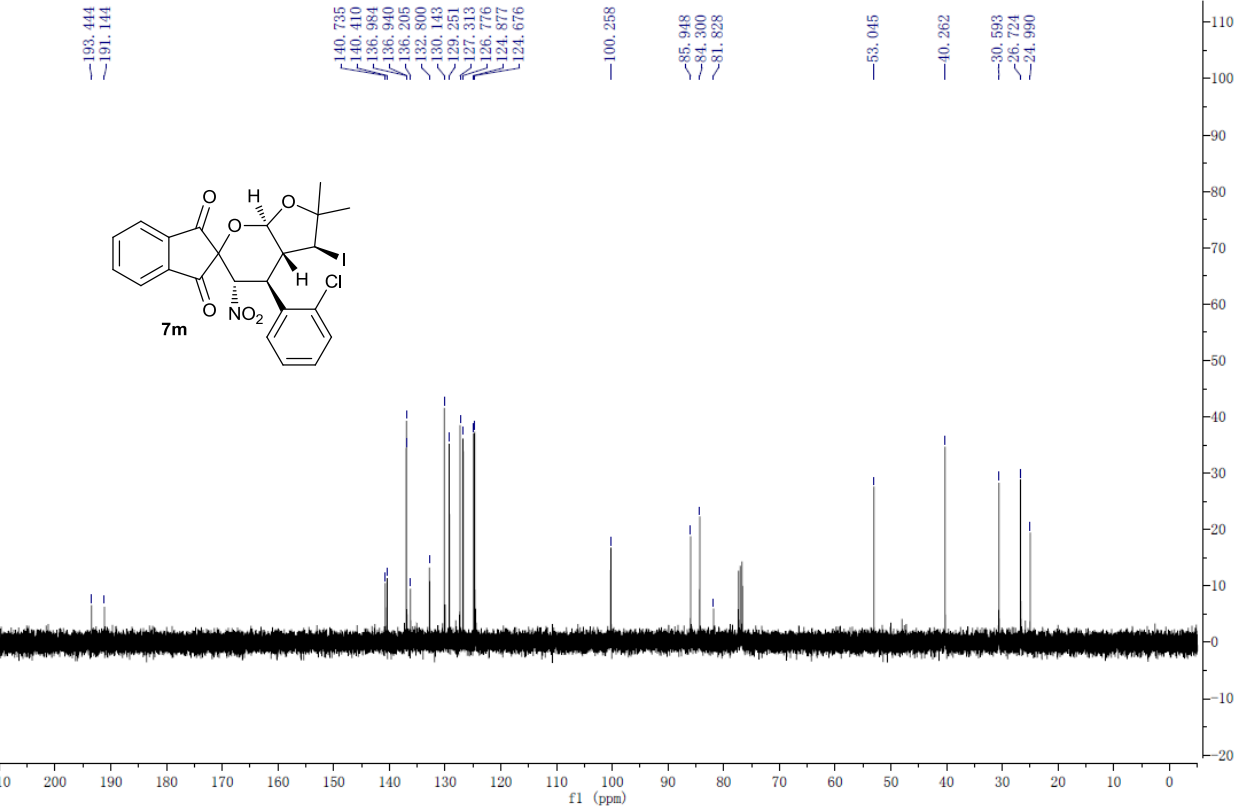

### Peak Analysis Report

| No. | Peak Name | Ret. Time (detected)<br>min | Area<br>mAU*min | Rel. Area<br>% | Height<br>mAU | Amount |
|-----|-----------|-----------------------------|-----------------|----------------|---------------|--------|
| 1   | n.a.      | 6.57                        | 23.919          | 43.89          | 100.246       | n.a.   |
| 2   | n.a.      | 7.93                        | 3.326           | 6.10           | 11.981        | n.a.   |
| 3   | n.a.      | 9.51                        | 3.285           | 6.03           | 11.763        | n.a.   |
| 4   | n.a.      | 12.41                       | 23.971          | 43.98          | 51.902        | n.a.   |

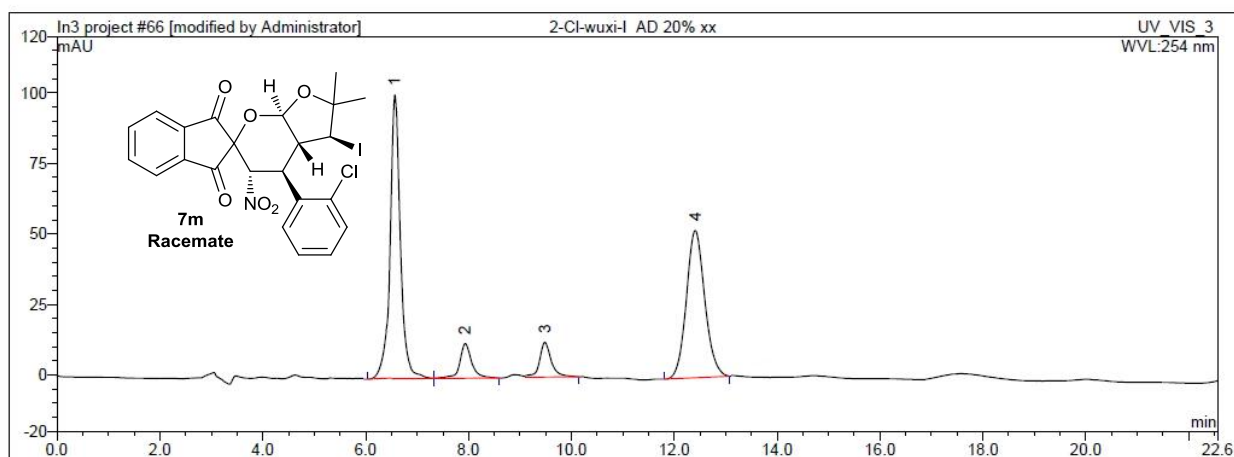

### Peak Analysis Report

| No. | Peak Name | Ret. Time (detected)<br>min | Area<br>mAU*min | Rel. Area<br>% | Height<br>mAU | Amount |
|-----|-----------|-----------------------------|-----------------|----------------|---------------|--------|
| 1   | n.a.      | 6.56                        | 108.420         | 96.92          | 482.328       | n.a.   |
| 2   | n.a.      | 12.24                       | 3.450           | 3.08           | 10.118        | n.a.   |

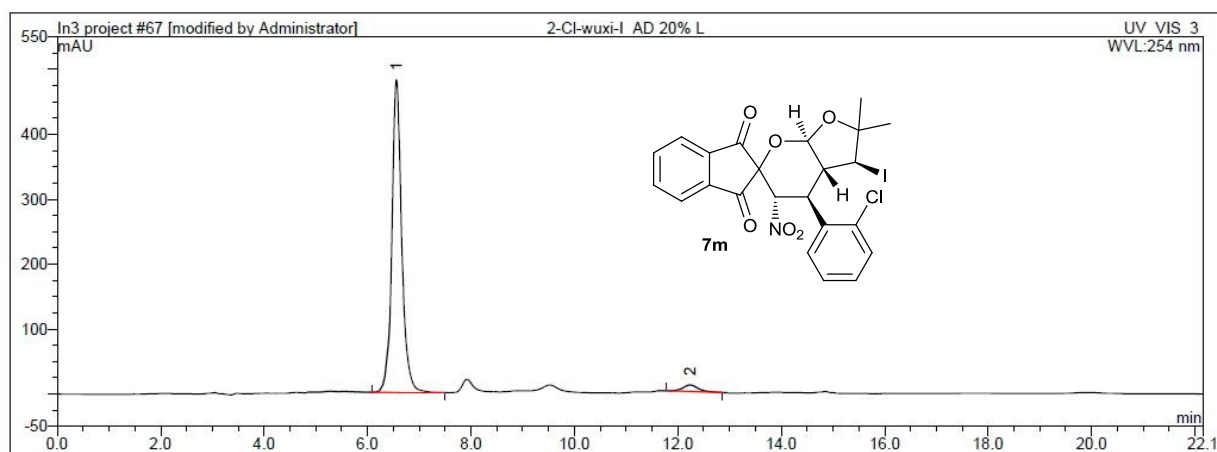

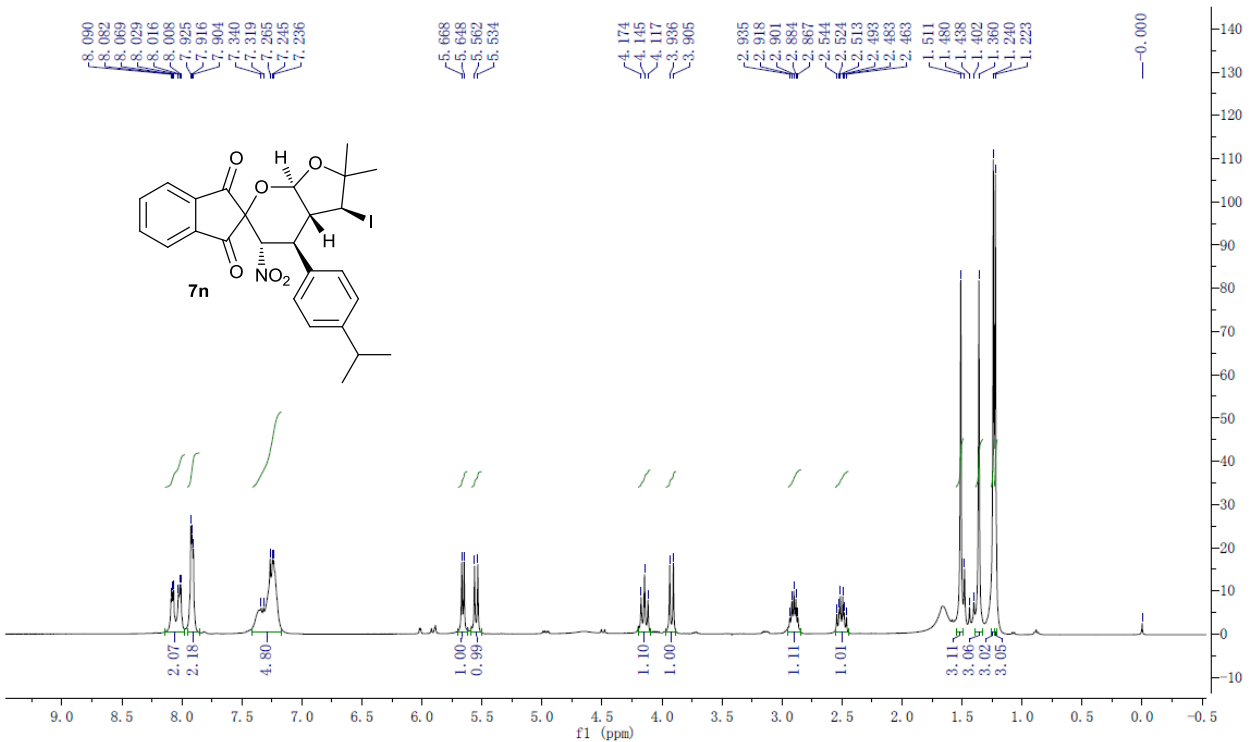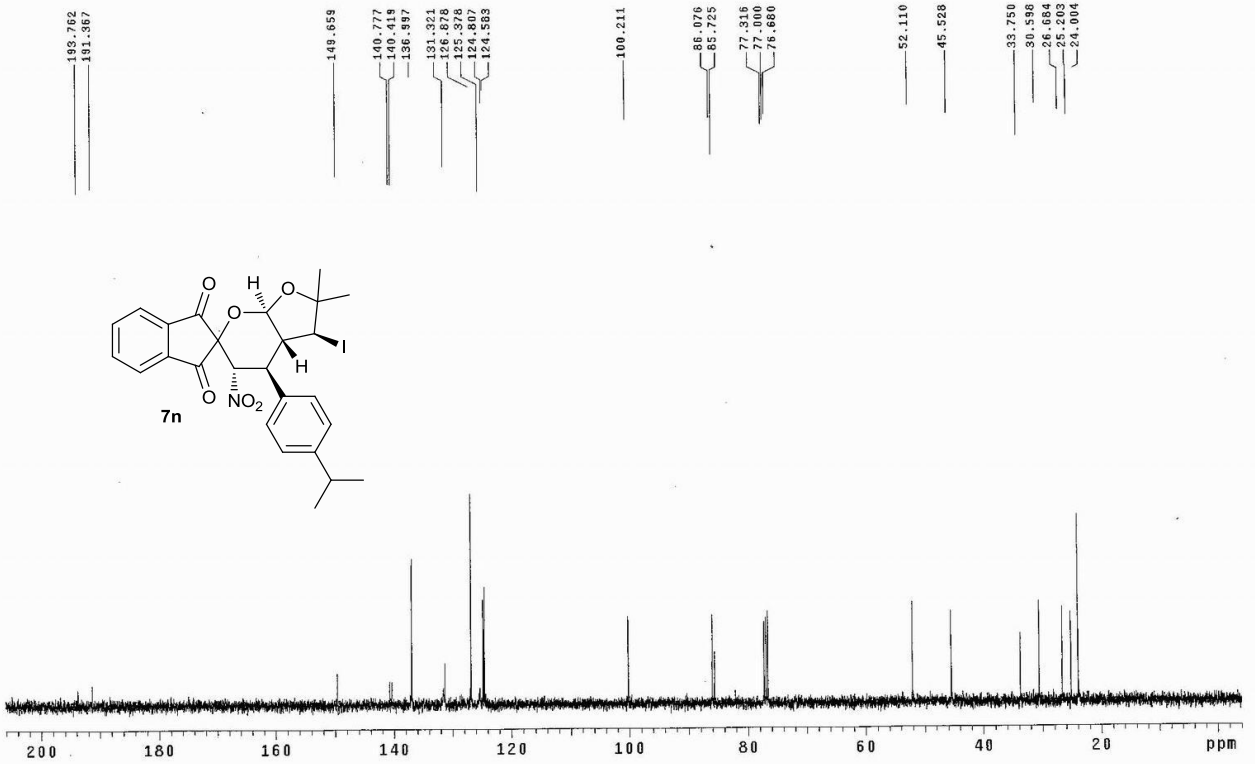

### Peak Analysis Report

| No. | Peak Name | Ret.Time (detected) | Area    | Rel.Area | Height  | Amount |
|-----|-----------|---------------------|---------|----------|---------|--------|
|     |           | min                 | mAU*min | %        | mAU     |        |
| 1   | n.a.      | 8.94                | 86.329  | 46.41    | 210.160 | n.a.   |
| 2   | n.a.      | 9.83                | 83.154  | 44.70    | 175.807 | n.a.   |
| 3   | n.a.      | 11.27               | 7.444   | 4.00     | 11.983  | n.a.   |
| 4   | n.a.      | 13.07               | 9.092   | 4.89     | 10.634  | n.a.   |

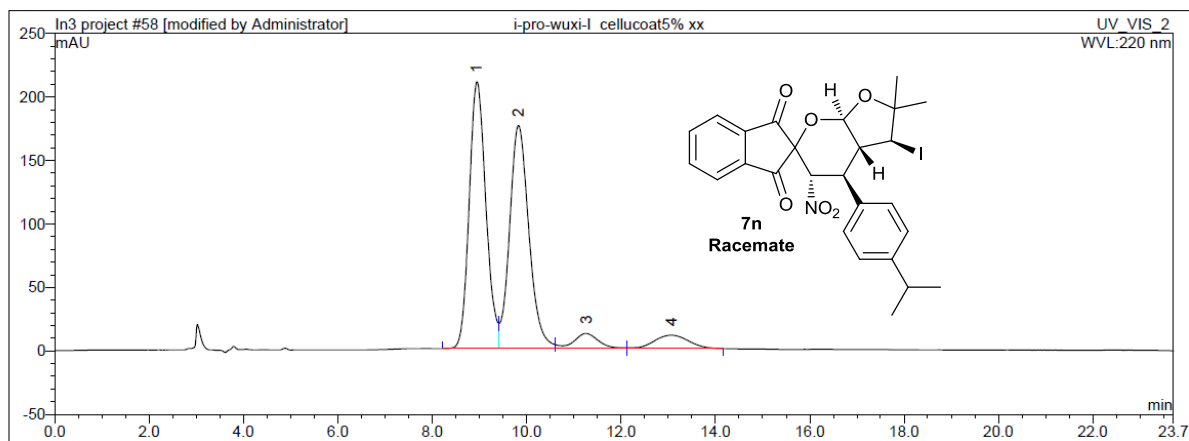

### Peak Analysis Report

| No. | Peak Name | Ret.Time (detected) | Area    | Rel.Area | Height  | Amount |
|-----|-----------|---------------------|---------|----------|---------|--------|
|     |           | min                 | mAU*min | %        | mAU     |        |
| 1   | n.a.      | 9.09                | 1.761   | 1.22     | 16.901  | n.a.   |
| 2   | n.a.      | 10.13               | 142.786 | 98.78    | 303.280 | n.a.   |

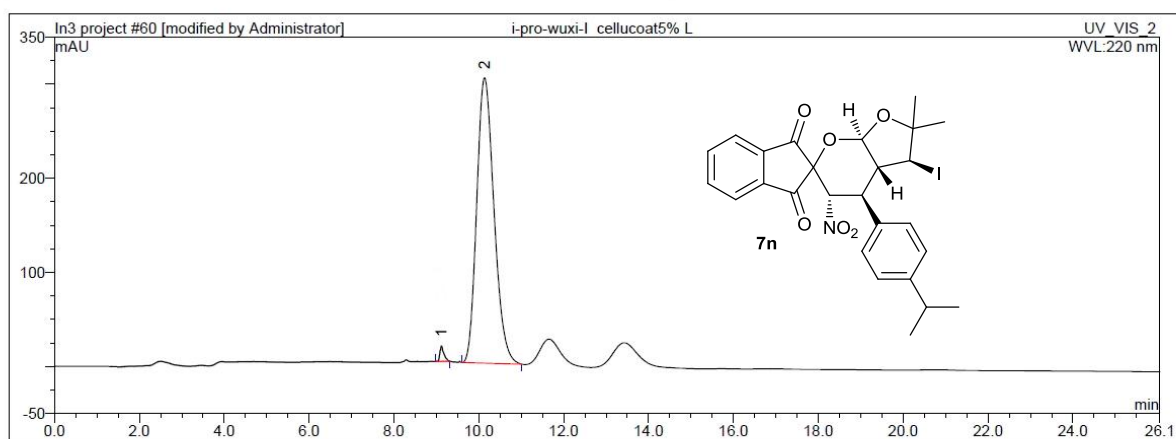

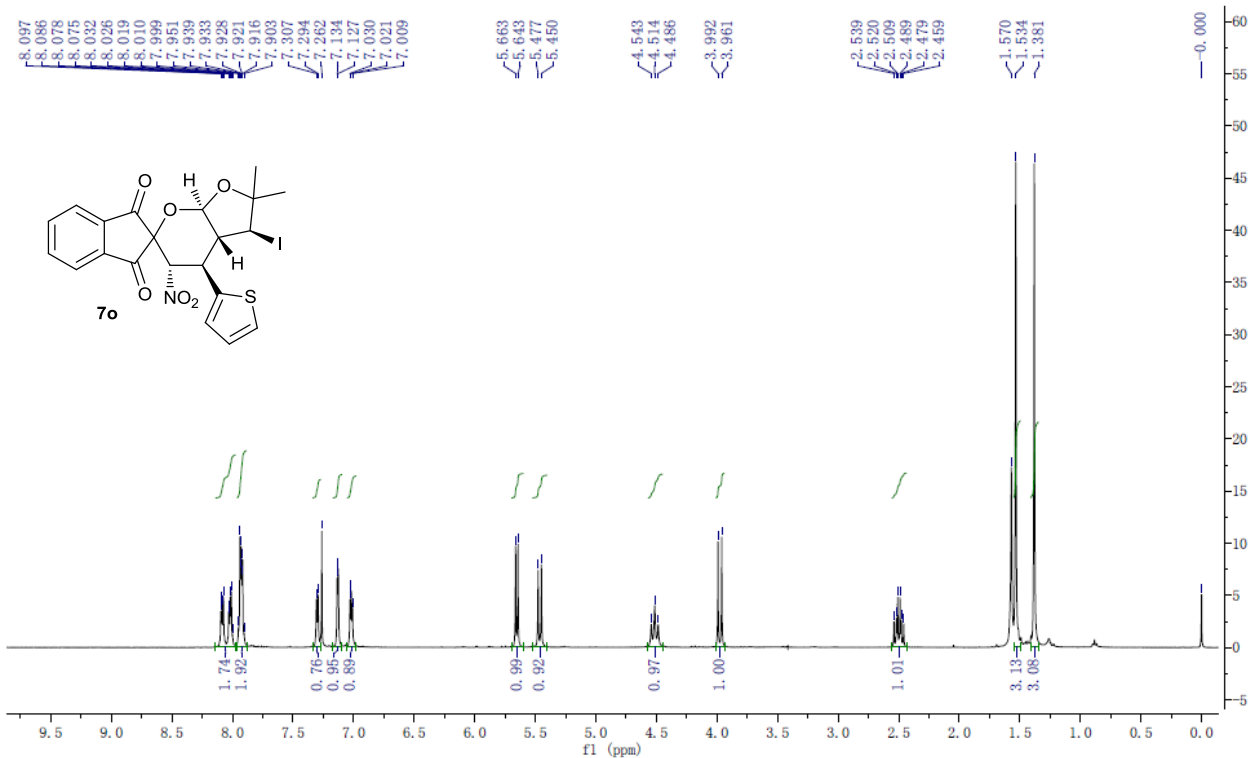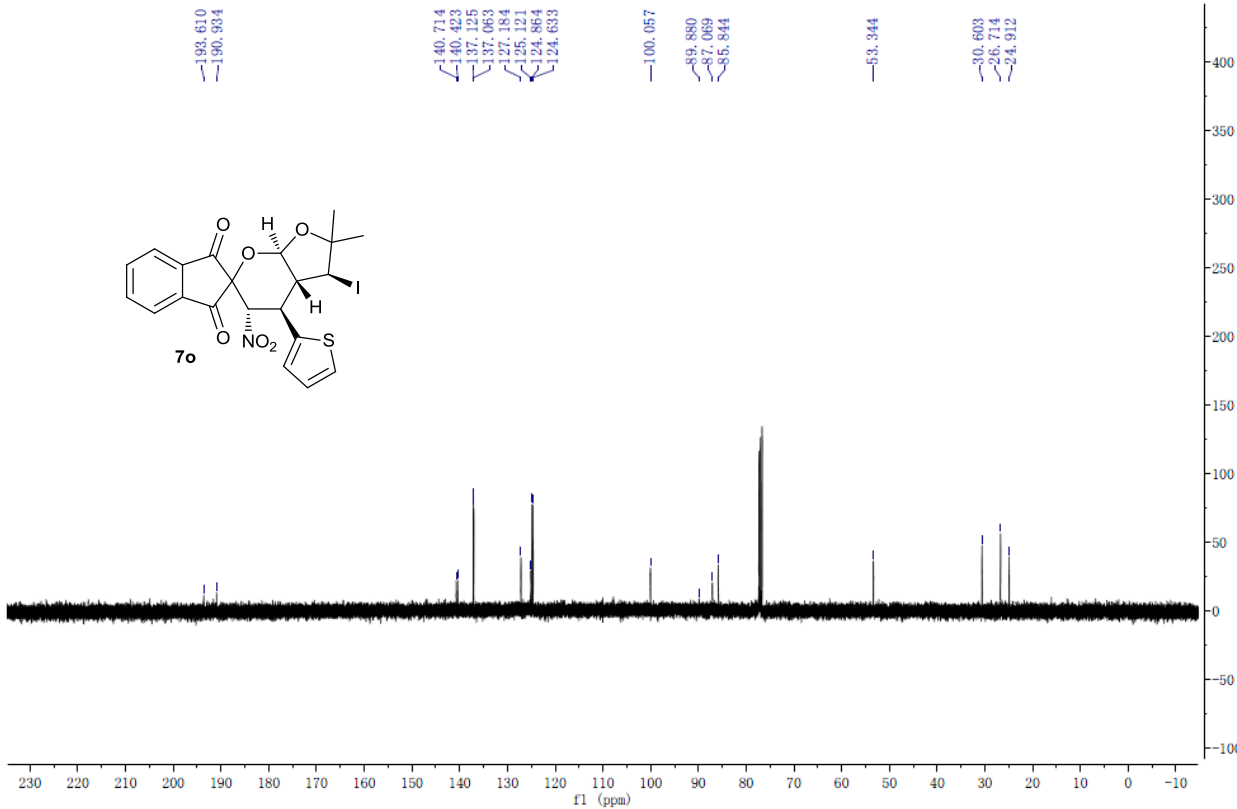

### Peak Analysis Report

| No. | Peak Name | Ret. Time (detected) | Area    | Rel. Area | Height | Amount |
|-----|-----------|----------------------|---------|-----------|--------|--------|
|     |           | min                  | mAU*min | %         | mAU    |        |
| 1   | n.a.      | 14.13                | 13.453  | 46.07     | 46.062 | n.a.   |
| 2   | n.a.      | 16.41                | 1.187   | 4.06      | 1.972  | n.a.   |
| 3   | n.a.      | 18.32                | 1.206   | 4.13      | 1.787  | n.a.   |
| 4   | n.a.      | 28.32                | 13.353  | 45.73     | 48.365 | n.a.   |

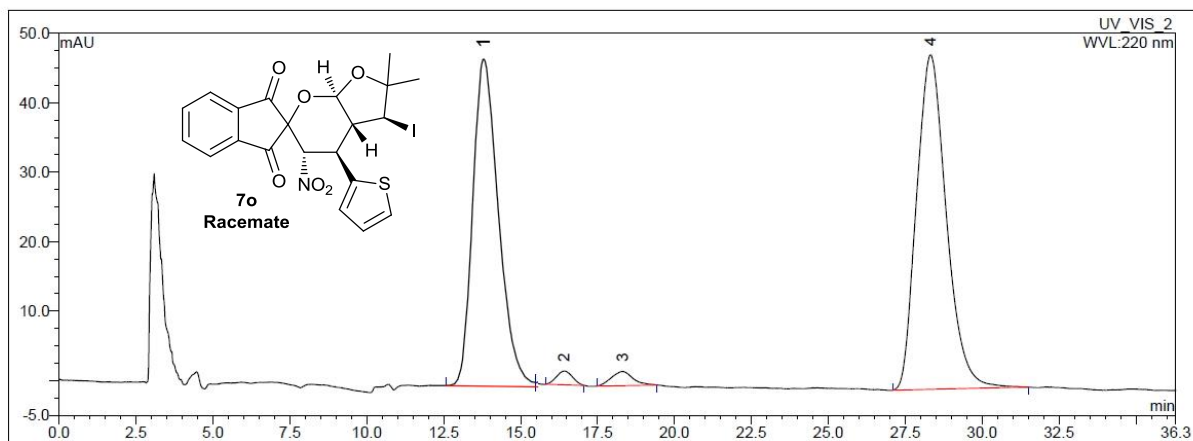

### Peak Analysis Report

| No. | Peak Name | Ret. Time (detected) | Area    | Rel. Area | Height | Amount |
|-----|-----------|----------------------|---------|-----------|--------|--------|
|     |           | min                  | mAU*min | %         | mAU    |        |
| 1   | n.a.      | 14.13                | 0.514   | 1.56      | 0.894  | n.a.   |
| 2   | n.a.      | 28.33                | 32.543  | 98.44     | 29.291 | n.a.   |

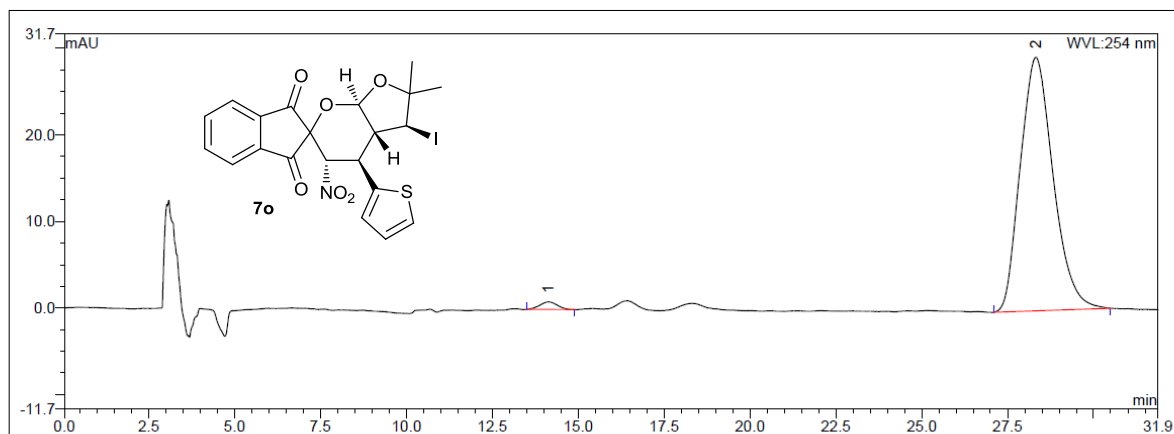

## 8. The confirmation of the absolute configuration of **7l**

The absolute configuration of **7l** was determined by selected NOESY spectra and the products **7m-7o** were assigned by analogy.

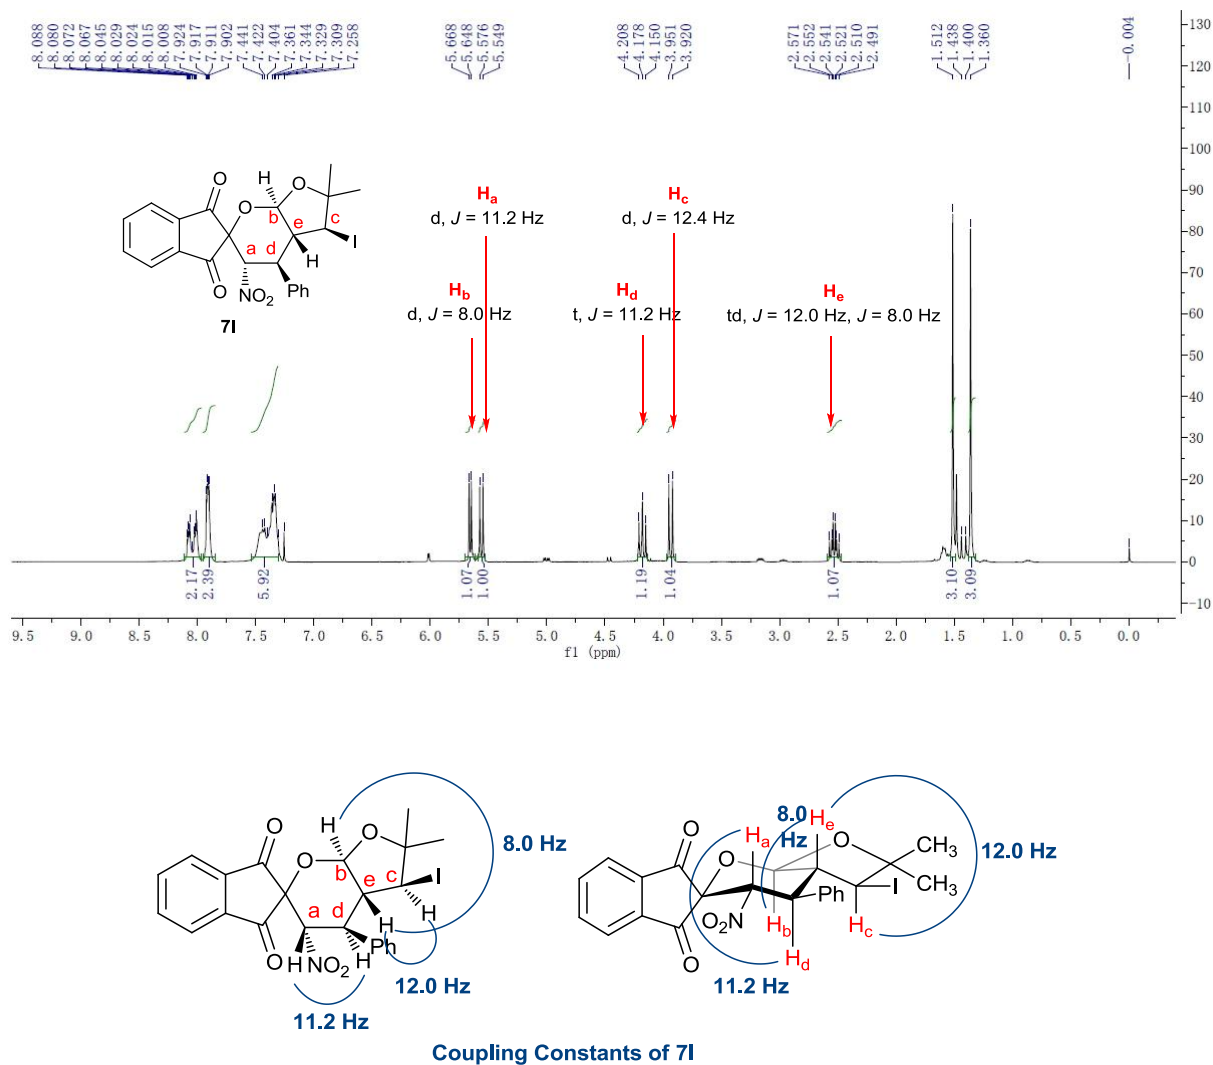

◇ The <sup>1</sup>H NMR spectrum of **7l** exhibited five proton signals ascribable to **H<sub>a</sub>**, **H<sub>b</sub>**, **H<sub>c</sub>**, **H<sub>d</sub>** and **H<sub>e</sub>** on the hexahydrofuro[2,3-*b*]pyran framework. Other signals observed in the <sup>1</sup>H NMR spectrum included nine aromatic protons and two methyl singlets (δ 1.51, 1.36 ppm).

◇ Three doublets could be assigned as **H<sub>a</sub>**, **H<sub>b</sub>** and **H<sub>c</sub>** by chemical shifts and coupling constants. **H<sub>d</sub>** appeared as a triplet at δ 4.18 (t, *J* = 11.2 Hz, 1H) and **H<sub>e</sub>** appeared as a triple doublet at δ 2.53 (td, *J* = 12.0, 8.0 Hz, 1H).



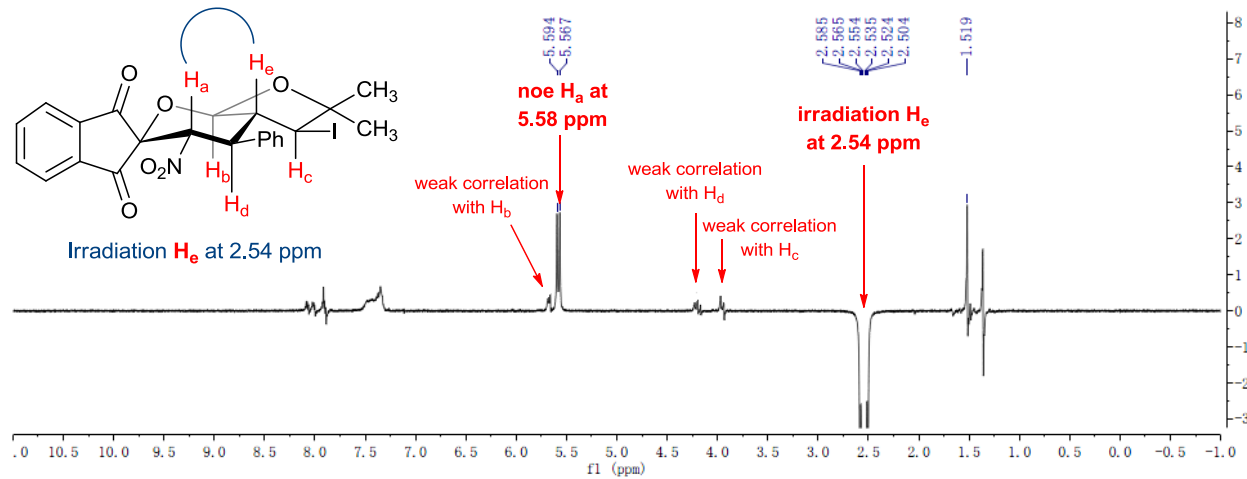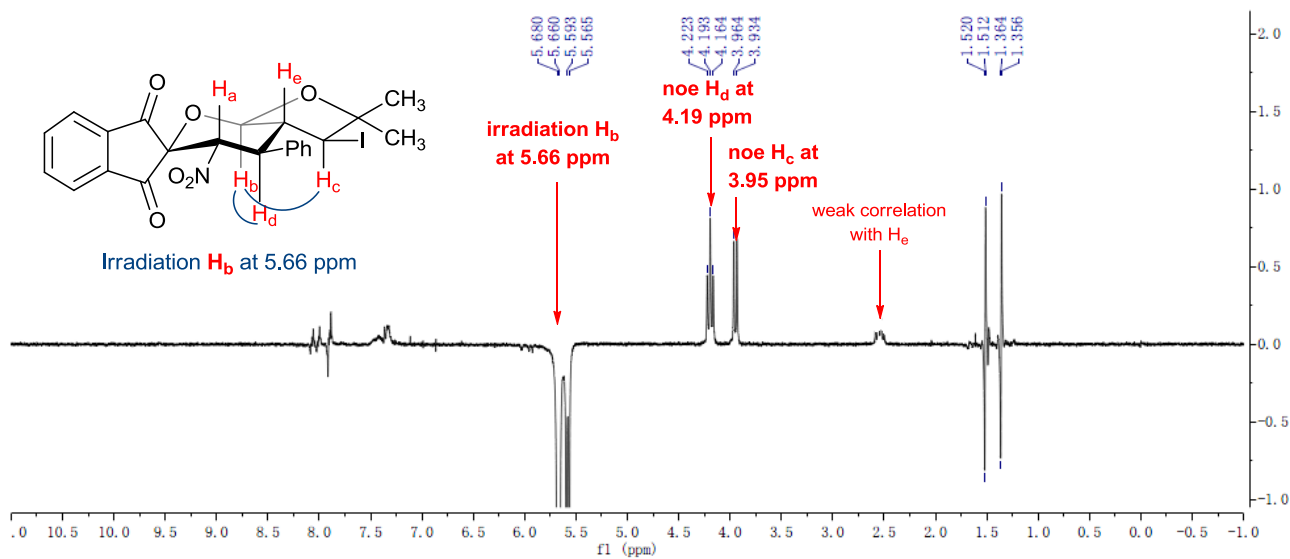

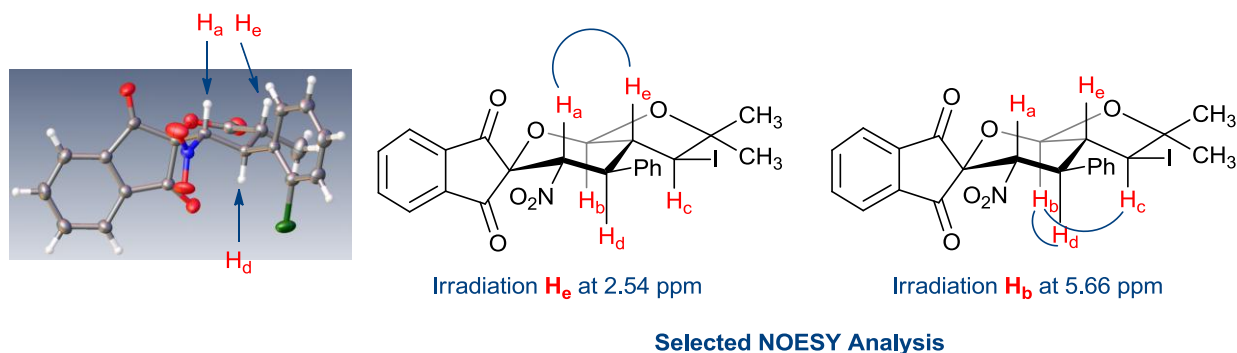

- ◇ The absolute configuration of  $H_a$ ,  $H_d$  and  $H_e$  could be confirmed by analogy from X-ray crystal structure of **6b** and the conformation of the three C-H bonds could be determined as axial.
- ◇ Irradiation  **$H_e$**  at 2.54 ppm: The strong NOESY correlation between  $H_e$  and  $H_a$  indicated that  $H_e$  and  $H_a$  were on the same side of the ring which was consistent with the X-ray crystal structure.
- ◇ Irradiation  **$H_b$**  at 5.66 ppm: The strong NOESY correlations of  $H_b$  with  $H_d$  and  $H_c$  indicated that  $H_b$ ,  $H_d$  and  $H_c$  were on the same side of the ring.
